# Supplementary material
Source: publisher figshare collection journal article supplement (https://acs.figshare.com/ndownloader/files/3712330)
Supplement: Supplementary file 1 [file 3712330]

# start Validation Reply Form
_vrf_PLAT924_I
;
PROBLEM: The Reported and Calculated Rho(min) Differ by . 5.41 eA-3
RESPONSE: For Fourier synthesis calculations, the correction of F(obs) for twinning was made according 
to the Fraction method as implemented in Jana2006. This correction is not included in the Checkcif routine.
;
_vrf_PLAT925_I
;
PROBLEM: The Reported and Calculated Rho(max) Differ by . 5.36 eA-3
RESPONSE: see previous answer
;
_vrf_PLAT971_I
;
PROBLEM: Check Calcd Residual Density 0.47A From Nd1 10.69 eA-3
RESPONSE: see previous answer
;
_vrf_PLAT972_I
;
PROBLEM: Check Calcd Residual Density 0.38A From Nd1 -9.46 eA-3
RESPONSE: see previous answer
;
# end Validation Reply Form
#=======================================================================
data_global
#=======================================================================

_audit_creation_method                   'Jana2006 Version : 17/11/2015'


# 1. PROCESSING SUMMARY (IUCr Office Use Only)

_journal_date_recd_electronic            ?
_journal_date_to_coeditor                ?
_journal_date_from_coeditor              ?
_journal_date_accepted                   ?
_journal_date_printers_first             ?
_journal_date_printers_final             ?
_journal_date_proofs_out                 ?
_journal_date_proofs_in                  ?
_journal_coeditor_name                   ?
_journal_coeditor_code                   ?
_journal_coeditor_notes
; ?
;
_journal_techeditor_code                 ?
_journal_paper_category                  ?
_journal_techeditor_notes
; ?
;
_journal_coden_ASTM                      ?
_journal_name_full                       'Acta Crystallographica Section C'
_journal_year                            ?
_journal_volume                          ?
_journal_issue                           ?
_journal_page_first                      ?
_journal_page_last                       ?
_journal_suppl_publ_number               ?
_journal_suppl_publ_pages                ?

#=======================================================================

# 2. SUBMISSION DETAILS

_publ_contact_author_name                ?
_publ_contact_author_address
; ?
;
_publ_contact_author_email               ?
_publ_contact_author_fax                 ?
_publ_contact_author_phone               ?

_publ_requested_journal                  'Acta Crystallographica Section C'
_publ_requested_category                 ?

_publ_contact_letter
; ?
;

#=======================================================================

# 3. TITLE AND AUTHOR LIST

_publ_section_title
; ?
;
_publ_section_title_footnote
; ?
;
loop_
 _publ_author_name
 _publ_author_footnote
 _publ_author_address
 ?       # name
; ?      # footnote
;
; ?      # address
;

#=======================================================================

# 4. TEXT

_publ_section_synopsis
; ?
;
_publ_section_abstract
; ?
;
_publ_section_comment
; ?
;
_publ_section_introduction
; ?
;
_publ_section_experimental
; ?
;
_publ_section_exptl_prep
; ?
;
_publ_section_exptl_refinement
; ?
;
_publ_section_exptl_solution
; ?
;
_publ_section_discussion
; ?
;
_publ_section_acknowledgements
; ?
;
_publ_section_references
;
Petricek, V., Dusek, M. & Palatinus L. (2006). Jana2006.
Structure Determination Software Programs.
Institute of Physics, Praha, Czech Republic.

Palatinus L. & Chapuis G. (2007). J. Appl. Cryst. 40, 786-790.

# enable this reference if Diamond ver. 2 was used for visualization
#Brandenburg, K. (1999). DIAMOND. Version. 2.1c.
#Crystal Impact GbR, Bonn, Germany.

# enable this reference if Diamond ver. 3 was used for visualization
#Brandenburg, K. & Putz, H. (2005). DIAMOND Version 3.
#Crystal Impact GbR, Postfach 1251, D-53002 Bonn, Germany.

# enable this reference if SIR97 was used for solving of the structure
#Altomare, A., Burla, M. C., Camalli, M., Cascarano, G., Giacovazzo, C.,
#Guagliardi, A., Moliterni, A. G. G., Polidori, G., Spagna, R. (1997).
#SIR97. A Package for Crystal Structure Solution by Direct Methods
#and Refinement, Bari, Rome, Italy.

# use this reference if SIR2002 was used for solving of the structure
#Burla, M.C., Camalli, M., Carrozzini, B., Cascarano, G., Giacovazzo, C.,
#Polidori, G., Spagna, R.
#SIR2002: the program, J. Appl. Cryst, (2003). 36, 1103

# enable this reference if bond valences were calculated
#Brown, I. D. (1996). J. Appl. Cryst. 29, 479-480.

# enable this reference if Xshape wase used for crystal shape refinement
#Stoe & Cie (1998). X-SHAPE. Stoe & Cie, Darmstadt, Germany.


# enable this reference if Flack coefficient was refined
#Flack, H. D. (1983). Acta Cryst. A39, 876-881.
;
_publ_section_figure_captions
; ?
;
_publ_section_table_legends
; ?
;

#=======================================================================
data_I
#=======================================================================

# 5. CHEMICAL DATA

_chemical_name_systematic
; ?
;
_chemical_name_common                    ?
_chemical_formula_moiety                 ?
_chemical_formula_structural             ?
_chemical_formula_analytical             ?
_chemical_formula_iupac                  ?
_chemical_formula_sum                    'C15 H37 B2 Nd1 O3'
_chemical_formula_weight                 431.3
_chemical_melting_point                  ?
_chemical_compound_source                ?
_chemical_absolute_configuration         .

#=======================================================================

# 6. CRYSTAL DATA

_symmetry_cell_setting                   monoclinic
_symmetry_space_group_name_H-M           'P 1 21/n 1'
_symmetry_space_group_name_Hall          '-P 2yabc'
_symmetry_Int_Tables_number              14

loop_
 _space_group_symop_id
 _space_group_symop_operation_xyz
 1   x,y,z
 2   -x+1/2,y+1/2,-z+1/2
 3   -x,-y,-z
 4   x+1/2,-y+1/2,z+1/2

_cell_length_a                           9.7322(4)
_cell_length_b                           13.8301(5)
_cell_length_c                           14.8354(6)
_cell_angle_alpha                        90
_cell_angle_beta                         90.720(2)
_cell_angle_gamma                        90
_cell_volume                             1996.65(14)

loop_
 _twin_individual_id
 _twin_individual_mass_fraction_refined
 _twin_individual_twin_matrix_11
 _twin_individual_twin_matrix_12
 _twin_individual_twin_matrix_13
 _twin_individual_twin_matrix_21
 _twin_individual_twin_matrix_22
 _twin_individual_twin_matrix_23
 _twin_individual_twin_matrix_31
 _twin_individual_twin_matrix_32
 _twin_individual_twin_matrix_33
1 0.302(3)
1 0 0
0 1 0
0 0 1
2 0.698(3)
-1 0 0
0 -1 0
-0.0165 0 1

_cell_formula_units_Z                    4

_cell_measurement_reflns_used            9177
_cell_measurement_theta_min              2.49
_cell_measurement_theta_max              30.1
_cell_measurement_temperature            100
_cell_special_details
; ?
;

_exptl_crystal_density_diffrn            1.4348
_exptl_crystal_density_meas              ?
_exptl_crystal_density_method            ?
_exptl_crystal_F_000                     884

_exptl_absorpt_coefficient_mu            2.606
_exptl_crystal_description               'irregular platelet'
_exptl_crystal_size_max                  0.310
_exptl_crystal_size_mid                  0.220
_exptl_crystal_size_min                  0.150
_exptl_crystal_size_rad                  ?
_exptl_crystal_colour                    'green'
_exptl_absorpt_correction_type           multi-scan
_exptl_absorpt_process_details           'Sadabs'
_exptl_absorpt_correction_T_min          0.5567
_exptl_absorpt_correction_T_max          0.7465
loop_
 _exptl_crystal_face_index_h
 _exptl_crystal_face_index_k
 _exptl_crystal_face_index_l
 _exptl_crystal_face_perp_dist
 ? ? ? ?

#=======================================================================

# 7. EXPERIMENTAL DATA

_exptl_special_details                   ?

_diffrn_ambient_temperature              100
_diffrn_source                           ?
_diffrn_source_power                     ?
_diffrn_source_voltage                   ?
_diffrn_source_current                   ?
_diffrn_radiation_type                   'Mo K\a'
_diffrn_radiation_source                 'X-ray tube'
_diffrn_radiation_wavelength             0.71073
_diffrn_radiation_monochromator          ?
_diffrn_measurement_device               ?
_diffrn_measurement_device_type          'Bruker X8 Apex CCD'
_diffrn_detector                         ?
_diffrn_detector_area_resol_mean         ?
_diffrn_measurement_method               ?
_diffrn_measurement_specimen_support     ?

_diffrn_reflns_number                    76524
_diffrn_reflns_theta_min                 2.01
_diffrn_reflns_theta_max                 25.24
_diffrn_reflns_theta_full                25.24
_diffrn_measured_fraction_theta_max      1
_diffrn_measured_fraction_theta_full     1
_diffrn_reflns_av_R_equivalents          0.0643
_diffrn_reflns_av_unetI/netI             0.0416
_diffrn_reflns_limit_h_min               -15
_diffrn_reflns_limit_h_max               14
_diffrn_reflns_limit_k_min               -21
_diffrn_reflns_limit_k_max               21
_diffrn_reflns_limit_l_min               -22
_diffrn_reflns_limit_l_max               22
_diffrn_reflns_reduction_process         ?

_diffrn_standards_number                 ?
_diffrn_standards_interval_count         ?
_diffrn_standards_interval_time          ?
_diffrn_standards_decay_%                ?
loop_
_diffrn_standard_refln_index_h
_diffrn_standard_refln_index_k
_diffrn_standard_refln_index_l
  ? ? ?

_diffrn_radiation_probe                  X-ray

#=======================================================================

# 8. REFINEMENT DATA

_refine_special_details
; ?
;

_reflns_number_total                     3614
_reflns_number_gt                        3064
_reflns_threshold_expression             'I>3\s(I)'

_refine_ls_structure_factor_coef         F
_refine_ls_R_factor_gt                   0.0380
_refine_ls_wR_factor_gt                  0.0458
_refine_ls_R_factor_all                  0.0488
_refine_ls_wR_factor_ref                 0.0467
_refine_ls_goodness_of_fit_ref           2.52
_refine_ls_goodness_of_fit_gt            2.70
_refine_ls_restrained_S_gt               ?
_refine_ls_restrained_S_all              ?
_refine_ls_number_reflns                 3614
_refine_ls_number_parameters             207
_refine_ls_number_restraints             4
_refine_ls_number_constraints            160
_refine_ls_weighting_scheme              sigma
_refine_ls_weighting_details             'w=1/(\s^2^(F)+0.0001F^2^)'
_refine_ls_hydrogen_treatment            'mixed'
_refine_ls_shift/su_max                  0.0054
_refine_ls_shift/su_mean                 0.0002
_refine_diff_density_max                 5.33
_refine_diff_density_min                 -4.05
_refine_ls_extinction_method             'none'
_refine_ls_extinction_coef               ?
_refine_ls_abs_structure_details         ?
_refine_ls_abs_structure_Flack           ?
_refine_ls_abs_structure_Rogers          ?

loop_
 _atom_type_symbol
 _atom_type_scat_dispersion_real
 _atom_type_scat_dispersion_imag
 _atom_type_scat_source
 C    0.0033  0.0016
 'International Tables Vol C tables 4.2.6.8 and 6.1.1.1'
 H    0.0000  0.0000
 'International Tables Vol C tables 4.2.6.8 and 6.1.1.1'
 B    0.0013  0.0007
 'International Tables Vol C tables 4.2.6.8 and 6.1.1.1'
 Nd  -0.1943  3.0179
 'International Tables Vol C tables 4.2.6.8 and 6.1.1.1'
 O    0.0106  0.0060
 'International Tables Vol C tables 4.2.6.8 and 6.1.1.1'

_computing_data_collection               ?
_computing_cell_refinement               ?
_computing_data_reduction                ?
_computing_structure_solution            ?
_computing_structure_refinement          ?
_computing_molecular_graphics            ?
_computing_publication_material          ?

loop_
 _restr_distance_atom_site_label_1
 _restr_distance_site_symmetry_1
 _restr_distance_atom_site_label_2
 _restr_distance_site_symmetry_2
 _restr_distance_target
 _restr_distance_target_weight_param
B2 . H5 . 1 0.05
B2 . H6 . 1 0.05
B2 . H7 . 1 0.05
B2 . H8 . 1 0.05

loop_
 _restr_angle_atom_site_label_1
 _restr_angle_site_symmetry_1
 _restr_angle_atom_site_label_2
 _restr_angle_site_symmetry_2
 _restr_angle_atom_site_label_3
 _restr_angle_site_symmetry_3
 _restr_angle_target
 _restr_angle_target_weight_param
 ? ? ? ? ? ? ? ?

loop_
 _restr_torsion_atom_site_label_1
 _restr_torsion_site_symmetry_1
 _restr_torsion_atom_site_label_2
 _restr_torsion_site_symmetry_2
 _restr_torsion_atom_site_label_3
 _restr_torsion_site_symmetry_3
 _restr_torsion_atom_site_label_4
 _restr_torsion_site_symmetry_4
 _restr_torsion_angle_target
 _restr_torsion_weight_param
 ? ? ? ? ? ? ? ? ? ?

loop_
 _restr_equal_distance_atom_site_label_1
 _restr_equal_distance_site_symmetry_1
 _restr_equal_distance_atom_site_label_2
 _restr_equal_distance_site_symmetry_2
 _restr_equal_distance_class_class_id
 _restr_equal_distance_class_target_weight_param
 ? ? ? ? ? ?

loop_
 _restr_equal_angle_atom_site_label_1
 _restr_equal_angle_site_symmetry_1
 _restr_equal_angle_atom_site_label_2
 _restr_equal_angle_site_symmetry_2
 _restr_equal_angle_atom_site_label_3
 _restr_equal_angle_site_symmetry_3
 _restr_equal_angle_class_class_id
 _restr_equal_angle_class_target_weight_param
 ? ? ? ? ? ? ? ?

loop_
 _restr_equal_torsion_atom_site_label_1
 _restr_equal_torsion_site_symmetry_1
 _restr_equal_torsion_atom_site_label_2
 _restr_equal_torsion_site_symmetry_2
 _restr_equal_torsion_atom_site_label_3
 _restr_equal_torsion_site_symmetry_3
 _restr_equal_torsion_atom_site_label_4
 _restr_equal_torsion_site_symmetry_4
 _restr_equal_torsion_class_class_id
 _restr_equal_torsion_class_target_weight_param
 ? ? ? ? ? ? ? ? ? ?


#=======================================================================

# 9. ATOMIC COORDINATES AND DISPLACEMENT PARAMETERS

loop_
 _atom_site_label
 _atom_site_type_symbol
 _atom_site_fract_x
 _atom_site_fract_y
 _atom_site_fract_z
 _atom_site_adp_type
 _atom_site_U_iso_or_equiv
 _atom_site_site_symmetry_multiplicity
 _atom_site_occupancy
 _atom_site_calc_flag
 _atom_site_refinement_flags
 _atom_site_disorder_assembly
 _atom_site_disorder_group
  Nd1 Nd 0.49736(5) 0.244375(16) 0.343319(18) Uani 0.02165(10) 4 1 d . . .
  O3 O 0.4919(8) 0.2432(2) 0.5153(3) Uani 0.0309(13) 4 1 d . . .
  O2 O 0.2871(5) 0.1523(3) 0.3840(3) Uani 0.0235(13) 4 1 d . . .
  O1 O 0.6946(5) 0.3542(3) 0.3863(3) Uani 0.0318(16) 4 1 d . . .
  B1 B 0.6698(8) 0.0916(5) 0.3714(6) Uani 0.026(3) 4 1 d . . .
  B2 B 0.3331(8) 0.3992(5) 0.3413(6) Uani 0.026(2) 4 1 d . . .
  C2 C 0.4734(7) 0.2511(4) 0.1592(4) Uani 0.042(3) 4 1 d . . .
  C13 C 0.2625(7) 0.0495(4) 0.3677(5) Uani 0.034(2) 4 1 d . . .
  C5 C 0.4632(8) 0.1568(5) 0.5678(4) Uani 0.044(3) 4 1 d . . .
  C4 C 0.1637(7) 0.1935(5) 0.4248(5) Uani 0.033(2) 4 1 d . . .
  C3 C 0.6015(6) 0.2896(5) 0.1809(4) Uani 0.038(2) 4 1 d . . .
  C6 C 0.5199(9) 0.2834(5) 0.6697(5) Uani 0.049(3) 4 1 d . . .
  C7 C 0.5282(10) 0.1756(5) 0.6574(5) Uani 0.064(4) 4 1 d . . .
  C8 C 0.7054(15) 0.4555(9) 0.3594(10) Uiso 0.029(2) 4 0.5 d . . .
  C8' C 0.6846(15) 0.4607(9) 0.4022(10) Uiso 0.029(2) 4 0.5 d . . .
  C9 C 0.0769(6) 0.1083(4) 0.4502(5) Uani 0.034(2) 4 1 d . . .
  C10 C 0.1114(8) 0.0343(4) 0.3774(5) Uani 0.037(2) 4 1 d . . .
  C11 C 0.830(2) 0.3337(13) 0.3915(11) Uiso 0.036(3) 4 0.5 d . . .
  C11' C 0.835(2) 0.3198(13) 0.4166(11) Uiso 0.036(3) 4 0.5 d . . .
  C12 C 0.5344(9) 0.3180(5) 0.5742(5) Uani 0.056(3) 4 1 d . . .
  C1 C 0.4217(7) 0.1633(4) 0.1832(4) Uani 0.037(3) 4 1 d . . .
  C14 C 0.805(2) 0.4965(16) 0.4206(14) Uiso 0.045(3) 4 0.5 d . . .
  C14' C 0.834(2) 0.4878(16) 0.4353(13) Uiso 0.045(3) 4 0.5 d . . .
  C15 C 0.9081(17) 0.4287(10) 0.3853(11) Uiso 0.039(3) 4 0.5 d . . .
  C15' C 0.9188(17) 0.4065(10) 0.4288(10) Uiso 0.039(3) 4 0.5 d . . .
  H11 H 0.41173 0.292755 0.121369 Uiso 0.0504 4 1 d . . .
  H2a H 0.313008 0.010459 0.414128 Uiso 0.0406 4 1 d . . .
  H2b H 0.290044 0.03287 0.304877 Uiso 0.0406 4 1 d . . .
  H3a H 0.508226 0.09969 0.53919 Uiso 0.0525 4 1 d . . .
  H3b H 0.36164 0.149694 0.574862 Uiso 0.0525 4 1 d . . .
  H4a H 0.11333 0.233682 0.379149 Uiso 0.0398 4 1 d . . .
  H4b H 0.190304 0.230339 0.480374 Uiso 0.0398 4 1 d . . .
  H12 H 0.619553 0.360068 0.171486 Uiso 0.0461 4 1 d . . .
  H13 H 0.675604 0.246954 0.205998 Uiso 0.0461 4 1 d . . .
  H6a H 0.426833 0.301111 0.692227 Uiso 0.0588 4 1 d . . .
  H6b H 0.600469 0.306034 0.706542 Uiso 0.0588 4 1 d . . .
  H7a H 0.626827 0.155324 0.656233 Uiso 0.0768 4 1 d . . .
  H7b H 0.473987 0.142824 0.705315 Uiso 0.0768 4 1 d . . .
  H9a H -0.022447 0.126243 0.445157 Uiso 0.0405 4 1 d . . .
  H9b H 0.107606 0.083272 0.510433 Uiso 0.0405 4 1 d . . .
  H10a H 0.094109 -0.032368 0.400768 Uiso 0.045 4 1 d . . .
  H10b H 0.063275 0.052208 0.319844 Uiso 0.045 4 1 d . . .
  H12a H 0.475059 0.376134 0.564262 Uiso 0.0675 4 1 d . . .
  H12b H 0.632798 0.334284 0.562716 Uiso 0.0675 4 1 d . . .
  H9 H 0.321913 0.148962 0.173603 Uiso 0.0444 4 1 d . . .
  H10 H 0.483645 0.113194 0.210488 Uiso 0.0444 4 1 d . . .
  H4 H 0.729(7) 0.034(5) 0.385(5) Uiso 0.0311 4 1 d . . .
  H2 H 0.683(7) 0.109(4) 0.306(4) Uiso 0.0311 4 1 d . . .
  H3 H 0.560(7) 0.070(4) 0.371(4) Uiso 0.0311 4 1 d . . .
  H1 H 0.679(7) 0.134(5) 0.421(4) Uiso 0.0311 4 1 d . . .
  H5 H 0.354(7) 0.381(4) 0.410(3) Uiso 0.0314 4 1 d . . .
  H7 H 0.292(6) 0.337(3) 0.306(4) Uiso 0.0314 4 1 d . . .
  H6 H 0.427(5) 0.414(4) 0.312(4) Uiso 0.0314 4 1 d . . .
  H8 H 0.256(5) 0.447(4) 0.332(4) Uiso 0.0314 4 1 d . . .
  H8a H 0.739065 0.459265 0.298926 Uiso 0.0345 4 0.5 d . . .
  H8b H 0.618375 0.486918 0.367344 Uiso 0.0345 4 0.5 d . . .
  H14a H 0.782832 0.478756 0.481263 Uiso 0.0535 4 0.5 d . . .
  H14b H 0.826984 0.561036 0.401804 Uiso 0.0535 4 0.5 d . . .
  H15a H 0.986229 0.426911 0.425429 Uiso 0.0473 4 0.5 d . . .
  H15b H 0.925203 0.443448 0.323193 Uiso 0.0473 4 0.5 d . . .
  H11a H 0.854273 0.29271 0.341961 Uiso 0.043 4 0.5 d . . .
  H11b H 0.850073 0.303187 0.44821 Uiso 0.043 4 0.5 d . . .
  H8a' H 0.620707 0.472953 0.44958 Uiso 0.0345 4 0.5 d . . .
  H8b' H 0.664934 0.492881 0.346134 Uiso 0.0345 4 0.5 d . . .
  H11a' H 0.827566 0.286594 0.473141 Uiso 0.043 4 0.5 d . . .
  H11b' H 0.874029 0.280024 0.37052 Uiso 0.043 4 0.5 d . . .
  H14a' H 0.86933 0.538717 0.398268 Uiso 0.0535 4 0.5 d . . .
  H14b' H 0.83117 0.508869 0.496863 Uiso 0.0535 4 0.5 d . . .
  H15a' H 0.973289 0.400456 0.482834 Uiso 0.0473 4 0.5 d . . .
  H15b' H 0.978536 0.413863 0.37822 Uiso 0.0473 4 0.5 d . . .

loop_
 _atom_site_aniso_label
 _atom_site_aniso_type_symbol
 _atom_site_aniso_U_11
 _atom_site_aniso_U_22
 _atom_site_aniso_U_33
 _atom_site_aniso_U_12
 _atom_site_aniso_U_13
 _atom_site_aniso_U_23
 Nd1 Nd 0.02227(17) 0.01377(15) 0.02897(18) 0.00167(17) 0.0026(3) 0.00253(12)
 O3 O 0.043(3) 0.0187(17) 0.031(2) 0.003(2) 0.002(3) -0.0011(16)
 O2 O 0.024(3) 0.018(2) 0.029(2) -0.0015(18) 0.010(2) -0.0049(18)
 O1 O 0.022(3) 0.017(2) 0.057(3) -0.0012(19) 0.006(3) -0.002(2)
 B1 B 0.017(4) 0.017(4) 0.044(5) 0.005(3) 0.012(4) 0.007(3)
 B2 B 0.026(4) 0.022(3) 0.031(4) 0.007(3) 0.010(4) 0.001(4)
 C2 C 0.067(8) 0.033(4) 0.026(3) 0.007(3) 0.013(5) -0.001(3)
 C13 C 0.041(5) 0.018(3) 0.043(5) 0.002(3) 0.010(4) -0.005(3)
 C5 C 0.071(7) 0.040(4) 0.021(4) 0.008(4) 0.004(4) 0.006(3)
 C4 C 0.027(4) 0.031(3) 0.042(4) -0.002(3) 0.016(3) -0.004(3)
 C3 C 0.043(5) 0.043(4) 0.030(4) 0.002(4) 0.016(4) 0.005(3)
 C6 C 0.052(6) 0.059(4) 0.037(4) -0.001(5) 0.011(5) -0.020(3)
 C7 C 0.106(9) 0.058(4) 0.028(4) -0.004(5) -0.018(5) 0.000(4)
 C9 C 0.018(4) 0.036(4) 0.048(5) -0.007(3) 0.014(3) -0.002(3)
 C10 C 0.048(5) 0.026(3) 0.039(4) -0.015(3) 0.018(4) -0.008(3)
 C12 C 0.081(8) 0.043(4) 0.045(5) -0.014(4) 0.001(5) -0.016(3)
 C1 C 0.042(5) 0.043(4) 0.026(4) 0.002(3) 0.007(4) -0.004(3)

loop_
 _jana_atom_site_ADP_C_label
 _jana_atom_site_ADP_C_type_symbol
 _jana_atom_site_ADP_C_111
 _jana_atom_site_ADP_C_112
 _jana_atom_site_ADP_C_113
 _jana_atom_site_ADP_C_122
 _jana_atom_site_ADP_C_123
 _jana_atom_site_ADP_C_133
 _jana_atom_site_ADP_C_222
 _jana_atom_site_ADP_C_223
 _jana_atom_site_ADP_C_233
 _jana_atom_site_ADP_C_333
 ? ? ? ? ? ? ? ? ? ? ? ?

loop_
 _jana_atom_site_ADP_D_label
 _jana_atom_site_ADP_D_type_symbol
 _jana_atom_site_ADP_D_1111
 _jana_atom_site_ADP_D_1112
 _jana_atom_site_ADP_D_1113
 _jana_atom_site_ADP_D_1122
 _jana_atom_site_ADP_D_1123
 _jana_atom_site_ADP_D_1133
 _jana_atom_site_ADP_D_1222
 _jana_atom_site_ADP_D_1223
 _jana_atom_site_ADP_D_1233
 _jana_atom_site_ADP_D_1333
 _jana_atom_site_ADP_D_2222
 _jana_atom_site_ADP_D_2223
 _jana_atom_site_ADP_D_2233
 _jana_atom_site_ADP_D_2333
 _jana_atom_site_ADP_D_3333
 ? ? ? ? ? ? ? ? ? ? ? ? ? ? ? ? ?

loop_
 _jana_atom_site_ADP_E_label
 _jana_atom_site_ADP_E_type_symbol
 _jana_atom_site_ADP_E_11111
 _jana_atom_site_ADP_E_11112
 _jana_atom_site_ADP_E_11113
 _jana_atom_site_ADP_E_11122
 _jana_atom_site_ADP_E_11123
 _jana_atom_site_ADP_E_11133
 _jana_atom_site_ADP_E_11222
 _jana_atom_site_ADP_E_11223
 _jana_atom_site_ADP_E_11233
 _jana_atom_site_ADP_E_11333
 _jana_atom_site_ADP_E_12222
 _jana_atom_site_ADP_E_12223
 _jana_atom_site_ADP_E_12233
 _jana_atom_site_ADP_E_12333
 _jana_atom_site_ADP_E_13333
 _jana_atom_site_ADP_E_22222
 _jana_atom_site_ADP_E_22223
 _jana_atom_site_ADP_E_22233
 _jana_atom_site_ADP_E_22333
 _jana_atom_site_ADP_E_23333
 _jana_atom_site_ADP_E_33333
 ? ? ? ? ? ? ? ? ? ? ? ? ? ? ? ? ? ? ? ? ? ? ?

loop_
 _jana_atom_site_ADP_F_label
 _jana_atom_site_ADP_F_type_symbol
 _jana_atom_site_ADP_F_111111
 _jana_atom_site_ADP_F_111112
 _jana_atom_site_ADP_F_111113
 _jana_atom_site_ADP_F_111122
 _jana_atom_site_ADP_F_111123
 _jana_atom_site_ADP_F_111133
 _jana_atom_site_ADP_F_111222
 _jana_atom_site_ADP_F_111223
 _jana_atom_site_ADP_F_111233
 _jana_atom_site_ADP_F_111333
 _jana_atom_site_ADP_F_112222
 _jana_atom_site_ADP_F_112223
 _jana_atom_site_ADP_F_112233
 _jana_atom_site_ADP_F_112333
 _jana_atom_site_ADP_F_113333
 _jana_atom_site_ADP_F_122222
 _jana_atom_site_ADP_F_122223
 _jana_atom_site_ADP_F_122233
 _jana_atom_site_ADP_F_122333
 _jana_atom_site_ADP_F_123333
 _jana_atom_site_ADP_F_133333
 _jana_atom_site_ADP_F_222222
 _jana_atom_site_ADP_F_222223
 _jana_atom_site_ADP_F_222233
 _jana_atom_site_ADP_F_222333
 _jana_atom_site_ADP_F_223333
 _jana_atom_site_ADP_F_233333
 _jana_atom_site_ADP_F_333333
 ? ? ? ? ? ? ? ? ? ? ? ? ? ? ? ? ? ? ? ? ? ? ? ? ? ? ? ? ? ?


#=======================================================================

# 10. MOLECULAR GEOMETRY


loop_
 _geom_bond_atom_site_label_1
 _geom_bond_atom_site_label_2
 _geom_bond_site_symmetry_1
 _geom_bond_site_symmetry_2
 _geom_bond_distance
 _geom_bond_publ_flag
  O3 C5 . . 1.455(8) ?
  O3 C12 . . 1.413(8) ?
  O2 C13 . . 1.461(7) ?
  O2 C4 . . 1.467(8) ?
  O1 C8 . . 1.462(13) ?
  O1 C8' . . 1.494(13) ?
  O1 C11 . . 1.35(2) ?
  O1 C11' . . 1.511(19) ?
  B1 H4 . . 1.00(7) ?
  B1 H2 . . 1.01(6) ?
  B1 H3 . . 1.11(7) ?
  B1 H1 . . 0.94(6) ?
  B2 H5 . . 1.07(5) ?
  B2 H7 . . 1.08(5) ?
  B2 H6 . . 1.04(5) ?
  B2 H8 . . 1.01(5) ?
  C2 C3 . . 1.390(9) ?
  C2 C1 . . 1.363(8) ?
  C2 H11 . . 0.9993 ?
  C13 C10 . . 1.494(10) ?
  C13 H2a . . 0.9995 ?
  C13 H2b . . 0.9998 ?
  C5 C7 . . 1.487(10) ?
  C5 H3a . . 1.0003 ?
  C5 H3b . . 1.0001 ?
  C4 C9 . . 1.501(9) ?
  C4 H4a . . 0.9997 ?
  C4 H4b . . 1.0005 ?
  C3 H12 . . 1.0004 ?
  C3 H13 . . 0.9999 ?
  C6 C7 . . 1.504(10) ?
  C6 C12 . . 1.504(10) ?
  C6 H6a . . 0.9998 ?
  C6 H6b . . 1.0004 ?
  C7 H7a . . 1.0022 ?
  C7 H7b . . 0.9982 ?
  C8 C8' . . 0.67(2) ?
  C8 C14 . . 1.44(3) ?
  C8 H8a . . 0.9562 ?
  C8 H8b . . 0.9579 ?
  C8 H8b' . . 0.6737 ?
  C8' C14 . . 1.29(3) ?
  C8' C14' . . 1.57(3) ?
  C8' H8b . . 0.8988 ?
  C8' H8a' . . 0.9641 ?
  C8' H8b' . . 0.9587 ?
  C9 C10 . . 1.528(9) ?
  C9 H9a . . 1.0001 ?
  C9 H9b . . 1.0004 ?
  C10 H10a . . 1 ?
  C10 H10b . . 0.9999 ?
  C11 C11' . . 0.43(2) ?
  C11 C15 . . 1.52(2) ?
  C11 C15' . . 1.44(2) ?
  C11 H11a . . 0.9568 ?
  C11 H11b . . 0.9674 ?
  C11 H11b' . . 0.9146 ?
  C11' C15' . . 1.46(2) ?
  C11' H11b . . 0.5369 ?
  C11' H11a' . . 0.956 ?
  C11' H11b' . . 0.9654 ?
  C12 H12a . . 0.9998 ?
  C12 H12b . . 1.0004 ?
  C1 H9 . . 0.9996 ?
  C1 H10 . . 1.0007 ?
  C14 C14' . . 0.37(3) ?
  C14 C15 . . 1.47(3) ?
  C14 H14a . . 0.9527 ?
  C14 H14b . . 0.9682 ?
  C14 H14a' . . 0.9274 ?
  C14' C15 . . 1.32(3) ?
  C14' C15' . . 1.40(3) ?
  C14' H14a . . 0.8625 ?
  C14' H14a' . . 0.9549 ?
  C14' H14b' . . 0.9628 ?
  C15 C15' . . 0.73(2) ?
  C15 H15a . . 0.9637 ?
  C15 H15b . . 0.9553 ?
  C15 H15b' . . 0.7259 ?
  C15' H15a . . 0.7125 ?
  C15' H15a' . . 0.9563 ?
  C15' H15b' . . 0.9608 ?

loop_
 _geom_angle_atom_site_label_1
 _geom_angle_atom_site_label_2
 _geom_angle_atom_site_label_3
 _geom_angle_site_symmetry_1
 _geom_angle_site_symmetry_2
 _geom_angle_site_symmetry_3
 _geom_angle
 _geom_angle_publ_flag
  C5 O3 C12 . . . 109.1(5) ?
  C13 O2 C4 . . . 108.2(5) ?
  C8 O1 C8' . . . 26.3(8) ?
  C8 O1 C11 . . . 98.2(10) ?
  C8 O1 C11' . . . 108.5(10) ?
  C8' O1 C11 . . . 105.0(10) ?
  C8' O1 C11' . . . 108.6(9) ?
  C11 O1 C11' . . . 16.2(9) ?
  H4 B1 H2 . . . 108(6) ?
  H4 B1 H3 . . . 110(5) ?
  H4 B1 H1 . . . 107(6) ?
  H2 B1 H3 . . . 101(5) ?
  H2 B1 H1 . . . 126(5) ?
  H3 B1 H1 . . . 105(5) ?
  H5 B2 H7 . . . 110(4) ?
  H5 B2 H6 . . . 107(5) ?
  H5 B2 H8 . . . 115(5) ?
  H7 B2 H6 . . . 106(4) ?
  H7 B2 H8 . . . 101(4) ?
  H6 B2 H8 . . . 118(4) ?
  C3 C2 C1 . . . 127.9(6) ?
  C3 C2 H11 . . . 116.1 ?
  C1 C2 H11 . . . 116.05 ?
  O2 C13 C10 . . . 106.3(5) ?
  O2 C13 H2a . . . 109.47 ?
  O2 C13 H2b . . . 109.44 ?
  C10 C13 H2a . . . 109.49 ?
  C10 C13 H2b . . . 109.46 ?
  H2a C13 H2b . . . 112.51 ?
  O3 C5 C7 . . . 104.6(6) ?
  O3 C5 H3a . . . 109.46 ?
  O3 C5 H3b . . . 109.47 ?
  C7 C5 H3a . . . 109.53 ?
  C7 C5 H3b . . . 109.4 ?
  H3a C5 H3b . . . 113.93 ?
  O2 C4 C9 . . . 105.4(5) ?
  O2 C4 H4a . . . 109.48 ?
  O2 C4 H4b . . . 109.46 ?
  C9 C4 H4a . . . 109.5 ?
  C9 C4 H4b . . . 109.49 ?
  H4a C4 H4b . . . 113.25 ?
  C2 C3 H12 . . . 119.97 ?
  C2 C3 H13 . . . 120.07 ?
  H12 C3 H13 . . . 119.97 ?
  C7 C6 C12 . . . 101.3(6) ?
  C7 C6 H6a . . . 109.42 ?
  C7 C6 H6b . . . 109.54 ?
  C12 C6 H6a . . . 109.46 ?
  C12 C6 H6b . . . 109.45 ?
  H6a C6 H6b . . . 116.61 ?
  C5 C7 C6 . . . 105.0(6) ?
  C5 C7 H7a . . . 109.39 ?
  C5 C7 H7b . . . 109.63 ?
  C6 C7 H7a . . . 109.34 ?
  C6 C7 H7b . . . 109.56 ?
  H7a C7 H7b . . . 113.54 ?
  O1 C8 C8' . . . 79.5(16) ?
  O1 C8 C14 . . . 104.1(14) ?
  O1 C8 H8a . . . 109.65 ?
  O1 C8 H8b . . . 109.56 ?
  O1 C8 H8b' . . . 140.52 ?
  C8' C8 C14 . . . 64(2) ?
  C8' C8 H8a . . . 170.14 ?
  C8' C8 H8b . . . 64.13 ?
  C8' C8 H8b' . . . 90.76 ?
  C14 C8 H8a . . . 109.5 ?
  C14 C8 H8b . . . 109.21 ?
  C14 C8 H8b' . . . 105.42 ?
  H8a C8 H8b . . . 114.32 ?
  H8a C8 H8b' . . . 84.28 ?
  H8b C8 H8b' . . . 35.04 ?
  O1 C8' C8 . . . 74.2(15) ?
  O1 C8' C14 . . . 110.4(17) ?
  O1 C8' C14' . . . 103.1(14) ?
  O1 C8' H8b . . . 110.77 ?
  O1 C8' H8a' . . . 109.26 ?
  O1 C8' H8b' . . . 109.59 ?
  C8 C8' C14 . . . 89(2) ?
  C8 C8' C14' . . . 93(2) ?
  C8 C8' H8b . . . 73.51 ?
  C8 C8' H8a' . . . 155.59 ?
  C8 C8' H8b' . . . 44.64 ?
  C14 C8' C14' . . . 9.6(14) ?
  C14 C8' H8b . . . 127.97 ?
  C14 C8' H8a' . . . 111.5 ?
  C14 C8' H8b' . . . 100.76 ?
  C14' C8' H8b . . . 137.55 ?
  C14' C8' H8a' . . . 109.55 ?
  C14' C8' H8b' . . . 109.58 ?
  H8b C8' H8a' . . . 82.98 ?
  H8b C8' H8b' . . . 34.97 ?
  H8a' C8' H8b' . . . 115.11 ?
  C4 C9 C10 . . . 102.7(6) ?
  C4 C9 H9a . . . 109.46 ?
  C4 C9 H9b . . . 109.46 ?
  C10 C9 H9a . . . 109.52 ?
  C10 C9 H9b . . . 109.49 ?
  H9a C9 H9b . . . 115.49 ?
  C13 C10 C9 . . . 101.5(5) ?
  C13 C10 H10a . . . 109.46 ?
  C13 C10 H10b . . . 109.51 ?
  C9 C10 H10a . . . 109.45 ?
  C9 C10 H10b . . . 109.45 ?
  H10a C10 H10b . . . 116.45 ?
  O1 C11 C11' . . . 104(4) ?
  O1 C11 C15 . . . 107.8(12) ?
  O1 C11 C15' . . . 117.2(13) ?
  O1 C11 H11a . . . 109.57 ?
  O1 C11 H11b . . . 108.85 ?
  O1 C11 H11b' . . . 127.86 ?
  C11' C11 C15 . . . 113(3) ?
  C11' C11 C15' . . . 85(3) ?
  C11' C11 H11a . . . 112.56 ?
  C11' C11 H11b . . . 5.21 ?
  C11' C11 H11b' . . . 83.3 ?
  C15 C11 C15' . . . 28.3(9) ?
  C15 C11 H11a . . . 110.06 ?
  C15 C11 H11b . . . 109.66 ?
  C15 C11 H11b' . . . 116.71 ?
  C15' C11 H11a . . . 124.25 ?
  C15' C11 H11b . . . 81.47 ?
  C15' C11 H11b' . . . 114.84 ?
  H11a C11 H11b . . . 110.8 ?
  H11a C11 H11b' . . . 30.58 ?
  H11b C11 H11b' . . . 80.89 ?
  O1 C11' C11 . . . 60(3) ?
  O1 C11' C15' . . . 106.3(11) ?
  O1 C11' H11b . . . 129.19 ?
  O1 C11' H11a' . . . 109.63 ?
  O1 C11' H11b' . . . 109.05 ?
  C11 C11' C15' . . . 78(3) ?
  C11 C11' H11b . . . 170.59 ?
  C11 C11' H11a' . . . 168.98 ?
  C11 C11' H11b' . . . 70.2 ?
  C15' C11' H11b . . . 96.02 ?
  C15' C11' H11a' . . . 109.84 ?
  C15' C11' H11b' . . . 109.47 ?
  H11b C11' H11a' . . . 20.32 ?
  H11b C11' H11b' . . . 105.2 ?
  H11a' C11' H11b' . . . 112.35 ?
  O3 C12 C6 . . . 108.6(6) ?
  O3 C12 H12a . . . 109.49 ?
  O3 C12 H12b . . . 109.45 ?
  C6 C12 H12a . . . 109.51 ?
  C6 C12 H12b . . . 109.48 ?
  H12a C12 H12b . . . 110.26 ?
  C2 C1 H9 . . . 120.04 ?
  C2 C1 H10 . . . 120 ?
  H9 C1 H10 . . . 119.97 ?
  C8 C14 C8' . . . 27.8(10) ?
  C8 C14 C14' . . . 139(7) ?
  C8 C14 C15 . . . 88.9(15) ?
  C8 C14 H14a . . . 110 ?
  C8 C14 H14b . . . 108.83 ?
  C8 C14 H14a' . . . 117.92 ?
  C8' C14 C14' . . . 134(6) ?
  C8' C14 C15 . . . 107.5(19) ?
  C8' C14 H14a . . . 84 ?
  C8' C14 H14b . . . 119.26 ?
  C8' C14 H14a' . . . 140.62 ?
  C14' C14 C15 . . . 59(4) ?
  C14' C14 H14a . . . 64.74 ?
  C14' C14 H14b . . . 106.05 ?
  C14' C14 H14a' . . . 83.08 ?
  C15 C14 H14a . . . 110.28 ?
  C15 C14 H14b . . . 108.93 ?
  C15 C14 H14a' . . . 78.63 ?
  H14a C14 H14b . . . 124.2 ?
  H14a C14 H14a' . . . 131.5 ?
  H14b C14 H14a' . . . 31.63 ?
  C8' C14' C14 . . . 36(5) ?
  C8' C14' C15 . . . 100.6(16) ?
  C8' C14' C15' . . . 109.4(18) ?
  C8' C14' H14a . . . 70.88 ?
  C8' C14' H14a' . . . 109.65 ?
  C8' C14' H14b' . . . 109.38 ?
  C14 C14' C15 . . . 107(5) ?
  C14 C14' C15' . . . 131(6) ?
  C14 C14' H14a . . . 92.73 ?
  C14 C14' H14a' . . . 74.59 ?
  C14 C14' H14b' . . . 114.82 ?
  C15 C14' C15' . . . 30.9(10) ?
  C15 C14' H14a . . . 132.76 ?
  C15 C14' H14a' . . . 86.02 ?
  C15 C14' H14b' . . . 137.91 ?
  C15' C14' H14a . . . 106.28 ?
  C15' C14' H14a' . . . 109.58 ?
  C15' C14' H14b' . . . 108.99 ?
  H14a C14' H14a' . . . 141.13 ?
  H14a C14' H14b' . . . 42.46 ?
  H14a' C14' H14b' . . . 109.79 ?
  C11 C15 C14 . . . 100.4(16) ?
  C11 C15 C14' . . . 103.0(17) ?
  C11 C15 C15' . . . 69.7(18) ?
  C11 C15 H15a . . . 109.19 ?
  C11 C15 H15b . . . 109.3 ?
  C11 C15 H15b' . . . 103.45 ?
  C14 C15 C14' . . . 13.8(10) ?
  C14 C15 C15' . . . 92(2) ?
  C14 C15 H15a . . . 109.25 ?
  C14 C15 H15b . . . 110.2 ?
  C14 C15 H15b' . . . 151.92 ?
  C14' C15 C15' . . . 80(2) ?
  C14' C15 H15a . . . 95.79 ?
  C14' C15 H15b . . . 120.84 ?
  C14' C15 H15b' . . . 141.12 ?
  C15' C15 H15a . . . 47.33 ?
  C15' C15 H15b . . . 157.5 ?
  C15' C15 H15b' . . . 82.81 ?
  H15a C15 H15b . . . 117.2 ?
  H15a C15 H15b' . . . 48.43 ?
  H15b C15 H15b' . . . 75.51 ?
  C11 C15' C11' . . . 17.2(8) ?
  C11 C15' C14' . . . 103.5(16) ?
  C11 C15' C15 . . . 82.0(19) ?
  C11 C15' H15a . . . 142.19 ?
  C11 C15' H15a' . . . 125.71 ?
  C11 C15' H15b' . . . 97.35 ?
  C11' C15' C14' . . . 109.7(17) ?
  C11' C15' C15 . . . 99(2) ?
  C11' C15' H15a . . . 145.12 ?
  C11' C15' H15a' . . . 109 ?
  C11' C15' H15b' . . . 109.09 ?
  C14' C15' C15 . . . 68.9(18) ?
  C14' C15' H15a . . . 103.89 ?
  C14' C15' H15a' . . . 110.14 ?
  C14' C15' H15b' . . . 109.53 ?
  C15 C15' H15a . . . 84.06 ?
  C15 C15' H15a' . . . 149.67 ?
  C15 C15' H15b' . . . 48.55 ?
  H15a C15' H15a' . . . 66.45 ?
  H15a C15' H15b' . . . 48.71 ?
  H15a' C15' H15b' . . . 109.38 ?

loop_
 _geom_torsion_atom_site_label_1
 _geom_torsion_atom_site_label_2
 _geom_torsion_atom_site_label_3
 _geom_torsion_atom_site_label_4
 _geom_torsion_site_symmetry_1
 _geom_torsion_site_symmetry_2
 _geom_torsion_site_symmetry_3
 _geom_torsion_site_symmetry_4
 _geom_torsion
 _geom_torsion_publ_flag
 ? ? ? ? ? ? ? ? ? ?

loop_
 _geom_hbond_atom_site_label_D
 _geom_hbond_atom_site_label_H
 _geom_hbond_atom_site_label_A
 _geom_hbond_site_symmetry_D
 _geom_hbond_site_symmetry_H
 _geom_hbond_site_symmetry_A
 _geom_hbond_distance_DH
 _geom_hbond_distance_HA
 _geom_hbond_distance_DA
 _geom_hbond_angle_DHA
 _geom_hbond_publ_flag
 ? ? ? ? ? ? ? ? ? ? ?


#=======================================================================

# 11. STRUCTURE-FACTOR LIST

loop_
 _refln_index_h
 _refln_index_k
 _refln_index_l
 _refln_F_squared_calc
 _refln_F_squared_meas
 _refln_F_squared_sigma
 _refln_observed_status
   2   0   0  59428.20  54577.60    832.13 o
   4   0   0  38825.60  36536.30    473.42 o
   6   0   0  29292.80  27744.30    435.18 o
   8   0   0   7400.68   7626.68    165.07 o
  10   0   0   8622.58   8570.53    211.98 o
   1   1   0    136.37      5.56      6.45 <
   2   1   0    148.24    193.97      8.89 o
   3   1   0    166.80    124.94      9.11 o
   4   1   0    387.98    378.16     17.12 o
   5   1   0    689.08    635.72     20.56 o
   6   1   0    573.38    458.53     22.34 o
   7   1   0      0.82    -49.35     22.01 <
   8   1   0    172.15    198.08     30.68 o
   9   1   0      7.27     62.36     30.68 <
  10   1   0    372.98    392.05     42.13 o
  11   1   0      3.09    305.35     48.58 o
   0   2   0  85564.70 103449.00   1993.18 o
   1   2   0  14075.90  15208.10    192.30 o
   2   2   0  97593.20  97186.70   1154.49 o
   3   2   0    888.45    870.81     20.90 o
   4   2   0  42195.00  40282.80    436.74 o
   5   2   0    789.28    774.44     21.34 o
   6   2   0  26843.70  25966.70    271.45 o
   7   2   0      5.70    -45.57     18.23 <
   8   2   0  12393.80  12174.50    167.18 o
   9   2   0    215.29    233.32     35.35 o
  10   2   0   6536.86   6574.24    118.72 o
  11   2   0     63.34    407.39     54.36 o
   1   3   0   1120.50   1028.55     17.79 o
   2   3   0     23.36     28.79      8.56 o
   3   3   0   1143.25   1011.76     23.68 o
   4   3   0     39.33     16.12     15.67 <
   5   3   0    122.40    110.05     15.67 o
   6   3   0    326.25    343.92     19.23 o
   7   3   0     86.03     10.67     19.23 <
   8   3   0    254.40    333.36     30.12 o
   9   3   0    207.65    352.37     40.02 o
  10   3   0     75.45    140.62     37.57 o
  11   3   0      5.39    237.99     44.80 o
   0   4   0  32966.90  37984.40    581.03 o
   1   4   0   2127.26   2022.30     26.46 o
   2   4   0  46640.60  48231.40    564.35 o
   3   4   0    130.35    109.60     14.12 o
   4   4   0  30543.90  29784.50    328.81 o
   5   4   0    197.38    173.63     16.56 o
   6   4   0  19064.80  19789.90    217.87 o
   7   4   0    961.00   1053.23     35.01 o
   8   4   0  15901.80  15813.10    210.98 o
   9   4   0     21.90    146.73     34.90 o
  10   4   0   5755.13   6454.52    119.83 o
   1   5   0    237.38    240.88     11.23 o
   2   5   0    310.19    317.69     13.56 o
   3   5   0    583.96    563.46     20.12 o
   4   5   0    302.13    256.11     15.90 o
   5   5   0   1161.59   1235.41     29.90 o
   6   5   0    240.08    291.01     21.68 o
   7   5   0    174.74    204.98     25.01 o
   8   5   0    385.18    415.07     34.46 o
   9   5   0    103.36    147.73     38.46 o
  10   5   0    149.23    168.40     44.46 o
  11   5   0    109.06    343.59     49.13 o
   0   6   0  20865.30  20791.70    325.69 o
   1   6   0   1434.81   1785.87     26.79 o
   2   6   0  44166.50  49878.90    491.88 o
   3   6   0    146.32    209.98     15.12 o
   4   6   0  22465.40  22698.10    248.77 o
   5   6   0     98.01    155.18     17.79 o
   6   6   0  13599.60  13748.30    169.52 o
   7   6   0     40.02     71.92     25.01 <
   8   6   0  11048.10  11786.70    166.85 o
   9   6   0    186.59    271.23     41.02 o
  10   6   0   4628.99   5309.70    112.16 o
   1   7   0    277.67    308.91     13.34 o
   2   7   0    168.92    204.20     12.01 o
   3   7   0   1579.21   1437.28     27.57 o
   4   7   0    286.63    302.24     18.90 o
   5   7   0    900.88    735.42     26.01 o
   6   7   0    102.71     73.14     23.45 o
   7   7   0    799.58    841.91     35.90 o
   8   7   0    475.47    440.63     38.57 o
   9   7   0    310.36    476.42     45.46 o
  10   7   0    304.46    305.24     51.58 o
   0   8   0  22368.80  24667.90    387.72 o
   1   8   0   2793.91   3138.78     43.35 o
   2   8   0  23086.10  24515.80    237.54 o
   3   8   0    865.19    992.98     22.12 o
   4   8   0  19383.80  20072.20    217.87 o
   5   8   0    217.17    286.90     22.23 o
   6   8   0  14008.60  14281.10    177.63 o
   7   8   0    114.28    124.94     30.24 o
   8   8   0   6693.18   6944.73    128.94 o
   9   8   0    159.30    227.43     45.02 o
  10   8   0   4986.21   5661.74    134.39 o
   1   9   0    515.15    505.88     19.01 o
   2   9   0     47.26     28.35     11.34 <
   3   9   0   1454.58   1362.02     28.79 o
   4   9   0    277.12    287.57     20.68 o
   5   9   0   1909.25   1864.57     47.13 o
   6   9   0    374.01    433.52     30.46 o
   7   9   0   1275.33   1276.54     52.91 o
   8   9   0    361.88    356.04     52.69 o
   9   9   0    489.35    624.49     63.69 o
   0  10   0  23663.50  25315.40    401.95 o
   1  10   0     56.72    115.27     15.12 o
   2  10   0  12971.70  13215.50    151.73 o
   3  10   0     25.40     66.47     16.78 o
   4  10   0  19909.90  20176.10    251.44 o
   5  10   0     15.50     55.02     29.57 <
   6  10   0   7569.36   7440.05    131.17 o
   7  10   0     38.60     47.24     37.68 <
   8  10   0   6216.43   6643.93    154.29 o
   9  10   0     46.05    239.55     58.14 o
   1  11   0   1409.02   1441.06     36.35 o
   2  11   0    599.29    763.99     28.68 o
   3  11   0   3140.93   3207.47     54.80 o
   4  11   0    366.56    538.34     27.68 o
   5  11   0   1237.38   1129.37     50.69 o
   6  11   0    185.91    199.20     40.02 o
   7  11   0   1142.14   1279.65     71.03 o
   8  11   0     10.17     24.90     57.47 <
   0  12   0  14569.70  15528.80    262.45 o
   1  12   0    314.04    357.15     23.79 o
   2  12   0  13319.50  13654.70    171.52 o
   3  12   0     95.62    130.28     22.90 o
   4  12   0   9942.30  10337.80    137.28 o
   5  12   0    109.35    184.86     37.13 o
   6  12   0   8419.61   8094.66    176.74 o
   7  12   0    182.54     69.14     49.35 <
   8  12   0   3625.87   3186.80    141.28 o
   1  13   0   4840.40   5135.85     85.26 o
   2  13   0    136.01    247.55     27.46 o
   3  13   0   1370.37   1384.25     44.91 o
   4  13   0      8.14    -29.68     24.57 <
   5  13   0   1579.65   1672.71     68.03 o
   6  13   0     96.28    145.73     57.25 <
   7  13   0    776.49    689.18     75.03 o
   0  14   0   9950.76   9831.40    193.08 o
   1  14   0      1.43     27.79     23.45 <
   2  14   0   9213.35   9189.13    140.73 o
   3  14   0     61.68    110.71     27.79 o
   4  14   0   6064.24   5995.10    104.38 o
   5  14   0    139.12    148.84     40.80 o
   6  14   0   4962.19   4934.32    143.28 o
   1  15   0   2524.69   2472.94     61.36 o
   2  15   0      0.33     16.23     26.57 <
   3  15   0   2084.66   2208.27     59.58 o
   4  15   0      1.70    -26.79     31.35 <
   0  16   0   3391.91   3047.29     97.82 o
   1  16   0      0.11     19.79     28.90 <
   2  16   0   6029.62   5340.27     99.26 o
   3  16   0     33.20     82.37     32.24 <
 -11   0   1    932.98    702.74     88.15 o
  -9   0   1   3185.80   3108.21     95.60 o
  -7   0   1   4456.57   4152.10    102.71 o
  -5   0   1  23222.10  22602.30    378.83 o
  -3   0   1  19616.50  18921.40    298.68 o
  -1   0   1  19780.20  19844.50    432.18 o
   1   0   1  22388.30  22471.70    372.71 o
   3   0   1  25094.20  23054.90    335.36 o
   5   0   1  35024.00  32586.20    474.65 o
   7   0   1   5131.37   4596.73     93.60 o
   9   0   1   5457.35   5530.68    126.17 o
  11   0   1   1358.50   1442.39     91.59 o
 -11   1   1   3631.17   4291.38    104.93 o
 -10   1   1     89.17    342.70     48.35 o
  -9   1   1   7167.67   7767.19    135.72 o
  -8   1   1    393.65    375.71     34.46 o
  -7   1   1   6605.28   6294.67     95.15 o
  -6   1   1    662.12    586.25     27.12 o
  -5   1   1  20033.50  18133.40    218.43 o
  -4   1   1    406.98    416.07     19.56 o
  -3   1   1  12908.30  11472.90    125.72 o
  -2   1   1   1854.50   1525.76     23.34 o
  -1   1   1  31524.10  32124.50    357.04 o
   0   1   1     44.74     17.90      3.22 o
   1   1   1  30278.20  31825.70    364.71 o
   2   1   1    847.96    915.28     15.90 o
   3   1   1  13175.70  11849.30    125.39 o
   4   1   1    181.91    146.40     14.34 o
   5   1   1  18058.90  16814.80    183.74 o
   6   1   1    285.42    174.30     18.67 o
   7   1   1   7104.35   6809.34     89.26 o
   8   1   1    170.38    101.82     27.23 o
   9   1   1   5975.75   6399.83    101.93 o
  10   1   1     59.86     11.67     33.13 <
  11   1   1   3187.07   3326.64     80.37 o
 -11   2   1   1237.71   1389.48     65.25 o
 -10   2   1    374.01    461.75     55.69 o
  -9   2   1   3313.54   3097.20     75.81 o
  -8   2   1     71.81     56.02     27.68 <
  -7   2   1   4100.92   3907.55     64.81 o
  -6   2   1    643.70    688.74     23.45 o
  -5   2   1   7792.10   7779.42     94.04 o
  -4   2   1    487.84    455.53     19.34 o
  -3   2   1  22564.60  22471.90    255.89 o
  -2   2   1   1911.35   2011.30     27.68 o
  -1   2   1  28349.70  31280.30    372.27 o
   0   2   1     85.40     86.59      6.34 o
   1   2   1  30636.30  33878.90    436.18 o
   2   2   1   2718.86   2482.17     32.90 o
   3   2   1  26040.50  24116.40    283.34 o
   4   2   1   1115.49   1201.40     29.23 o
   5   2   1  10796.80  10108.30    114.60 o
   6   2   1    835.45    872.04     27.23 o
   7   2   1   7380.13   6700.18     87.37 o
   8   2   1    150.05    123.72     29.46 o
   9   2   1   4455.68   4319.95     78.59 o
  10   2   1    329.09    547.01     40.80 o
  11   2   1   1941.86   2371.34     71.47 o
 -11   3   1   3315.54   3722.58     87.04 o
 -10   3   1     25.84    268.23     41.80 o
  -9   3   1   6621.75   6771.77    107.93 o
  -8   3   1    276.07    334.36     31.35 o
  -7   3   1  10464.60   9887.87    127.83 o
  -6   3   1    101.70     89.04     16.34 o
  -5   3   1   7851.78   7486.40     83.37 o
  -4   3   1    209.10    208.76     14.01 o
  -3   3   1  34732.50  34712.40    366.93 o
  -2   3   1    367.11    507.99     13.89 o
  -1   3   1  30018.30  32052.40    368.05 o
   0   3   1   1243.40   1237.86     19.34 o
   1   3   1  27992.90  31584.40    349.26 o
   2   3   1    673.27    669.06     15.34 o
   3   3   1  35204.90  33915.10    399.06 o
   4   3   1    445.53    507.99     20.90 o
   5   3   1   8929.15   8399.24    105.04 o
   6   3   1    188.96    189.30     19.90 o
   7   3   1   8047.52   8008.40     98.93 o
   8   3   1    220.94    206.09     29.68 o
   9   3   1   6372.62   6415.06     98.38 o
  10   3   1     58.69     71.25     34.24 <
  11   3   1   2599.29   2875.11     80.92 o
 -11   4   1   1231.34   1226.74     65.25 o
 -10   4   1    143.70    246.66     38.79 o
  -9   4   1   2266.97   2271.52     58.47 o
  -8   4   1     34.84     -5.56     26.90 <
  -7   4   1   3953.27   3957.13     57.02 o
  -6   4   1    567.00    516.55     23.01 o
  -5   4   1   3589.18   3557.62     50.24 o
  -4   4   1   1614.08   1510.31     31.01 o
  -3   4   1  21037.60  22707.80    246.77 o
  -2   4   1   1324.22   1169.61     20.34 o
  -1   4   1  11042.80  12442.60    147.17 o
   0   4   1    320.27    354.60     10.78 o
   1   4   1  10369.10  12115.60    122.72 o
   2   4   1    714.31    822.91     18.56 o
   3   4   1  23619.40  24253.10    288.79 o
   4   4   1    699.15    485.21     21.45 o
   5   4   1   4818.55   4469.68     61.69 o
   6   4   1    249.74    177.30     18.79 o
   7   4   1   5813.84   5589.37     81.37 o
   8   4   1     58.71    183.30     32.24 o
   9   4   1   3637.62   3628.65     75.59 o
  10   4   1     74.22    340.14     43.57 o
  11   4   1   1979.02   2416.14     75.48 o
 -11   5   1   2645.39   3086.87    100.26 o
 -10   5   1    102.36    348.48     44.80 o
  -9   5   1   4580.93   4523.25     87.48 o
  -8   5   1    328.52    447.97     35.68 o
  -7   5   1  10689.40  10849.40    134.39 o
  -6   5   1     97.42     83.81     19.23 o
  -5   5   1  14291.60  14201.60    164.74 o
  -4   5   1    141.94    149.95     15.01 o
  -3   5   1  24987.00  26660.90    278.56 o
  -2   5   1    411.23    477.65     14.67 o
  -1   5   1  26487.70  29165.10    292.12 o
   0   5   1     73.15    108.93     10.00 o
   1   5   1  24273.20  28206.20    281.56 o
   2   5   1    944.12    917.39     20.45 o
   3   5   1  23765.50  25770.90    269.78 o
   4   5   1    310.62    349.37     17.23 o
   5   5   1  14261.70  13995.70    169.52 o
   6   5   1    131.52    114.60     19.90 o
   7   5   1  10153.70  10210.00    143.28 o
   8   5   1    269.55    181.85     32.79 o
   9   5   1   3748.01   3975.02     85.26 o
  10   5   1     50.25      5.89     40.80 <
  11   5   1   2173.82   2305.54     80.26 o
 -10   6   1     66.27    172.96     49.47 o
  -9   6   1   1174.58   1236.86     55.25 o
  -8   6   1    462.59    378.94     37.46 o
  -7   6   1   5631.89   5933.63     87.37 o
  -6   6   1    885.23    881.60     34.57 o
  -5   6   1   6119.98   6300.68     78.14 o
  -4   6   1   1620.55   1564.00     30.57 o
  -3   6   1   5833.44   6133.27     68.81 o
  -2   6   1    802.71    879.15     19.12 o
  -1   6   1   7210.27   7388.92     76.48 o
   0   6   1   1868.28   1909.26     28.57 o
   1   6   1   6898.60   7335.23     77.70 o
   2   6   1   1234.04   1120.36     21.34 o
   3   6   1   5643.53   6063.91     70.25 o
   4   6   1    833.44    932.73     25.01 o
   5   6   1   6620.06   6505.32     82.59 o
   6   6   1    588.70    462.20     25.57 o
   7   6   1   7869.72   7639.25    108.93 o
   8   6   1    339.08    366.27     34.68 o
   9   6   1   1970.66   2336.21     67.47 o
  10   6   1     62.03    419.51     49.24 o
 -10   7   1    100.28    325.80     56.47 o
  -9   7   1   3020.59   3169.24     81.92 o
  -8   7   1     60.45    104.71     37.02 <
  -7   7   1  11373.40  11372.50    159.29 o
  -6   7   1    835.92    853.25     35.68 o
  -5   7   1  12180.30  12154.60    138.17 o
  -4   7   1    151.60    140.62     16.56 o
  -3   7   1  16560.90  17125.50    161.74 o
  -2   7   1    446.91    485.10     16.12 o
  -1   7   1  24507.00  26192.10    252.33 o
   0   7   1   1080.39   1051.56     21.12 o
   1   7   1  23215.80  25756.30    253.66 o
   2   7   1    292.27    367.82     13.67 o
   3   7   1  13685.90  15190.00    165.29 o
   4   7   1    347.37    344.04     18.56 o
   5   7   1  11178.60  11668.10    137.17 o
   6   7   1    550.21    491.76     27.57 o
   7   7   1   9157.35   9575.51    128.39 o
   8   7   1    114.83    144.28     30.24 o
   9   7   1   2967.35   3198.36     78.70 o
  10   7   1    217.42    212.98     48.13 o
 -10   8   1    349.46    411.51     61.36 o
  -9   8   1   1516.06   1566.55     65.81 o
  -8   8   1    342.61    480.87     44.69 o
  -7   8   1   3336.87   3614.87     81.37 o
  -6   8   1   1692.10   1691.05     49.13 o
  -5   8   1   4696.31   4750.68     65.69 o
  -4   8   1   2333.32   1973.28     31.12 o
  -3   8   1   3813.85   4180.33     50.58 o
  -2   8   1   1331.25   1671.04     28.23 o
  -1   8   1   8083.29   8658.23     94.93 o
   0   8   1   1106.56   1208.29     24.34 o
   1   8   1   7417.56   8347.21     89.37 o
   2   8   1   2886.51   2532.30     34.68 o
   3   8   1   4978.65   4932.98     57.80 o
   4   8   1   1281.13   1272.10     30.12 o
   5   8   1   5166.19   5037.47     74.81 o
   6   8   1   2622.89   2523.96     53.58 o
   7   8   1   4176.11   4122.20     75.59 o
   8   8   1    156.39    278.56     33.01 o
   9   8   1   2022.25   2388.24     68.25 o
  10   8   1    170.12    477.76     56.47 o
  -9   9   1   4192.18   3910.33    106.60 o
  -8   9   1     74.18    161.40     45.02 o
  -7   9   1   4197.40   3877.43    103.04 o
  -6   9   1    553.49    560.57     35.57 o
  -5   9   1  12924.20  12940.80    168.40 o
  -4   9   1    255.29    275.12     17.90 o
  -3   9   1  11529.20  11347.50    127.61 o
  -2   9   1   1346.68   1360.02     29.68 o
  -1   9   1  15332.40  16421.90    171.85 o
   0   9   1    748.96    696.30     20.12 o
   1   9   1  15329.10  16513.60    178.19 o
   2   9   1    864.61   1045.89     22.68 o
   3   9   1   9593.36  10336.70    116.61 o
   4   9   1    575.61    522.78     25.01 o
   5   9   1  10297.70  10822.90    149.51 o
   6   9   1    296.63    324.36     30.35 o
   7   9   1   4172.21   4246.47     84.93 o
   8   9   1    166.34    240.88     46.69 o
   9   9   1   3219.11   3209.70    101.49 o
  -9  10   1   1565.94   1500.30     90.82 o
  -8  10   1    922.47   1034.33     70.14 o
  -7  10   1   1410.71   1326.67     69.92 o
  -6  10   1    953.52   1018.21     48.69 o
  -5  10   1   4748.16   5155.30     93.04 o
  -4  10   1   1228.77   1242.42     39.13 o
  -3  10   1   2848.48   3026.62     51.13 o
  -2  10   1   2239.66   2138.80     40.46 o
  -1  10   1   7234.42   8158.58    102.82 o
   0  10   1   1568.53   1513.53     33.46 o
   1  10   1   8268.48   8703.81    108.60 o
   2  10   1   1855.68   1921.48     36.90 o
   3  10   1   3283.88   3232.71     50.80 o
   4  10   1   1447.14   1479.85     39.13 o
   5  10   1   6503.60   6536.55    105.49 o
   6  10   1    701.79    703.63     40.46 o
   7  10   1   1198.70   1282.10     55.80 o
   8  10   1    617.28    769.77     57.91 o
   9  10   1   2152.24   2213.72    103.15 o
  -8  11   1    399.31    440.63     61.03 o
  -7  11   1   3651.92   3617.87    104.04 o
  -6  11   1    197.74    187.86     42.46 o
  -5  11   1   7584.11   7292.65    128.17 o
  -4  11   1   1278.11   1132.93     36.79 o
  -3  11   1   6932.03   7451.05     98.82 o
  -2  11   1    842.63   1018.43     30.57 o
  -1  11   1   9870.81  10291.10    127.28 o
   0  11   1   1400.34   1441.72     33.46 o
   1  11   1  10403.10  10329.90    127.72 o
   2  11   1   1705.52   1538.10     36.68 o
   3  11   1   8176.40   8103.11    105.38 o
   4  11   1    612.48    609.04     28.46 o
   5  11   1   6235.95   6545.78    118.94 o
   6  11   1    452.51    522.55     45.46 o
   7  11   1   3145.90   3263.83     92.48 o
   8  11   1    613.40    598.59     69.25 o
  -8  12   1    759.65    764.55     85.26 o
  -7  12   1   1871.40   1903.03     92.82 o
  -6  12   1   1250.36   1259.87     68.70 o
  -5  12   1   2080.21   2095.89     61.47 o
  -4  12   1   1309.89   1349.68     41.80 o
  -3  12   1   3481.70   3835.52     65.03 o
  -2  12   1   2294.41   1941.49     45.46 o
  -1  12   1   4591.73   4642.42     72.03 o
   0  12   1   1492.64   1637.58     38.68 o
   1  12   1   4581.91   4679.77     72.25 o
   2  12   1   1097.89   1277.77     36.68 o
   3  12   1   4107.25   4237.47     71.25 o
   4  12   1   2005.60   1821.89     47.69 o
   5  12   1   2776.44   2605.00     73.48 o
   6  12   1    669.84    762.77     54.91 o
   7  12   1   2288.11   2380.57     92.93 o
   8  12   1    597.61    546.23     71.25 o
  -7  13   1   3503.72   3311.41    127.72 o
  -6  13   1    525.87    490.21     57.14 o
  -5  13   1   4331.78   4394.65     93.04 o
  -4  13   1    994.39   1066.34     42.24 o
  -3  13   1   5860.09   5774.79     91.26 o
  -2  13   1    713.55    900.05     36.57 o
  -1  13   1   5916.37   5913.85     94.26 o
   0  13   1    568.33    630.60     28.90 o
   1  13   1   6376.38   6118.71     93.26 o
   2  13   1   1134.05   1124.48     38.24 o
   3  13   1   5671.60   5671.85     92.93 o
   4  13   1   1058.24   1183.61     42.35 o
   5  13   1   4194.13   4119.31     89.93 o
   6  13   1    799.00    775.22     54.58 o
   7  13   1   3267.87   3194.47    114.94 o
  -6  14   1    986.57    881.82     67.92 o
  -5  14   1   1703.84   1923.71     70.03 o
  -4  14   1   1114.51   1197.06     46.24 o
  -3  14   1   2332.32   2367.12     58.02 o
  -2  14   1   1303.28   1391.81     47.69 o
  -1  14   1   2016.25   2182.15     55.47 o
   0  14   1   1405.59   1459.95     45.24 o
   1  14   1   2636.77   2426.59     56.02 o
   2  14   1   1364.01   1452.51     48.24 o
   3  14   1   3251.54   2878.67     63.25 o
   4  14   1    910.80    962.30     44.91 o
   5  14   1   2031.57   2173.03     74.59 o
   6  14   1    698.08    694.74     65.92 o
  -4  15   1    562.49    627.60     42.80 o
  -3  15   1   4559.75   4667.32     86.59 o
  -2  15   1    894.37    933.73     43.80 o
  -1  15   1   3936.61   3653.66     75.59 o
   0  15   1    996.30   1221.19     44.02 o
   1  15   1   3460.06   3305.63     74.36 o
   2  15   1    757.97    855.59     42.13 o
   3  15   1   4512.91   4502.25     84.59 o
   4  15   1    861.63    803.12     50.47 o
  -3  16   1   2162.55   2361.78     65.36 o
  -2  16   1   1270.04   1412.60     52.02 o
  -1  16   1   1427.34   1593.57     55.25 o
   0  16   1   1552.66   1632.14     54.02 o
   1  16   1   1471.69   1539.99     56.36 o
   2  16   1   1338.15   1491.19     56.25 o
   3  16   1   2300.04   2429.48     68.36 o
 -10   0   2   1800.76   1708.28    109.49 o
  -8   0   2   2360.57   2392.35     80.92 o
  -6   0   2   1612.75   1654.37     55.13 o
  -4   0   2   3630.93   3268.28     79.03 o
  -2   0   2   4842.99   4863.07     94.82 o
   0   0   2    908.02    839.69     20.01 o
   2   0   2   5163.60   4964.33     70.59 o
   4   0   2   3177.38   2933.58     56.91 o
   6   0   2    932.48    788.11     35.13 o
   8   0   2   1754.55   1757.86     66.25 o
  10   0   2    797.66    324.36     54.13 o
 -11   1   2     70.49    124.50     48.69 <
 -10   1   2   5491.15   5897.73    131.72 o
  -9   1   2    120.02     19.34     41.68 <
  -8   1   2   5853.21   6503.43    123.28 o
  -7   1   2     28.17     26.57     25.57 <
  -6   1   2  18059.90  17670.70    224.32 o
  -5   1   2     48.32     36.90     16.90 <
  -4   1   2  18037.50  16563.00    206.87 o
  -3   1   2    277.10    186.41     14.01 o
  -2   1   2   2215.12   2100.67     32.35 o
  -1   1   2   8565.38   8391.01     92.48 o
   0   1   2  49050.10  48694.50    476.20 o
   1   1   2   7713.61   7819.88     90.37 o
   2   1   2   2750.07   2434.92     27.68 o
   3   1   2    625.41    546.68     14.12 o
   4   1   2  18039.60  16736.30    180.19 o
   5   1   2    109.27     12.34     13.01 <
   6   1   2  19631.40  18330.30    200.64 o
   7   1   2     17.75    -35.57     19.34 <
   8   1   2   6257.96   6704.85     99.04 o
   9   1   2    138.93    236.10     32.68 o
  10   1   2   5231.93   5489.67     94.60 o
  11   1   2     52.03    416.73     43.80 o
 -11   2   2     19.74    354.26     58.36 o
 -10   2   2   1560.74   1845.01     68.70 o
  -9   2   2    160.48    249.44     37.24 o
  -8   2   2   1578.91   1732.96     52.13 o
  -7   2   2    203.29    198.97     26.57 o
  -6   2   2   1671.36   1489.30     33.01 o
  -5   2   2     96.38    129.50     15.34 o
  -4   2   2   2710.09   2472.05     39.24 o
  -3   2   2    269.67    258.33     12.89 o
  -2   2   2   7709.98   7236.41     70.59 o
  -1   2   2   1001.85   1105.47     17.01 o
   0   2   2   8107.29   8215.94     97.49 o
   1   2   2   1314.31   1388.03     18.12 o
   2   2   2   4946.31   5454.65     61.03 o
   3   2   2    117.74     87.59     11.34 o
   4   2   2   1709.13   1751.97     33.46 o
   5   2   2    111.61     53.02     13.78 o
   6   2   2   1237.73   1187.39     28.68 o
   7   2   2     92.74     -0.11     18.45 <
   8   2   2   1102.87   1047.33     39.91 o
   9   2   2    241.89    238.88     35.24 o
  10   2   2    832.40    694.74     42.13 o
  11   2   2     18.00    129.50     43.35 <
 -11   3   2     27.07    138.28     48.69 <
 -10   3   2   3752.32   4102.08     88.26 o
  -9   3   2     24.07     78.92     34.57 <
  -8   3   2   9671.52   9460.02    136.95 o
  -7   3   2    170.41    145.73     24.68 o
  -6   3   2  14407.80  14773.80    156.84 o
  -5   3   2     80.59     52.80     14.78 o
  -4   3   2  19518.60  19120.90    195.30 o
  -3   3   2   1471.99   1577.78     27.57 o
  -2   3   2  33285.30  32982.80    329.58 o
  -1   3   2    455.31    464.53     11.89 o
   0   3   2   1280.94   1267.43     23.45 o
   1   3   2    567.32    527.56     13.01 o
   2   3   2  29745.60  30703.50    307.91 o
   3   3   2   1668.25   1639.36     28.79 o
   4   3   2  18960.30  18624.20    231.32 o
   5   3   2    178.53    158.40     17.01 o
   6   3   2  15411.90  15499.80    184.97 o
   7   3   2    165.95    150.51     24.45 o
   8   3   2  10882.70  10475.10    140.95 o
   9   3   2     16.21    174.85     34.90 o
  10   3   2   4427.96   4560.05     84.26 o
 -11   4   2     46.13    414.51     54.36 o
 -10   4   2    838.86    879.26     50.02 o
  -9   4   2    412.26    519.11     39.68 o
  -8   4   2   1584.71   1674.27     48.24 o
  -7   4   2    470.69    478.42     29.57 o
  -6   4   2   1814.78   1652.37     33.35 o
  -5   4   2    262.37    252.55     15.23 o
  -4   4   2   3298.98   2980.82     37.90 o
  -3   4   2    293.98    387.83     14.34 o
  -2   4   2   6618.13   6977.63     73.25 o
  -1   4   2    982.97    972.08     18.90 o
   0   4   2   5854.09   6751.09     90.59 o
   1   4   2    767.39    816.90     16.90 o
   2   4   2   5951.46   6641.15     81.70 o
   3   4   2    665.38    723.86     20.68 o
   4   4   2   2764.54   2776.96     41.24 o
   5   4   2    331.27    299.35     19.23 o
   6   4   2    920.90    692.18     25.57 o
   7   4   2    221.01    166.63     23.90 o
   8   4   2    961.43    873.71     41.24 o
   9   4   2    285.99    215.09     33.13 o
  10   4   2    726.37    684.18     44.57 o
  11   4   2     51.87    143.28     45.35 o
 -11   5   2     11.04     17.79     51.36 <
 -10   5   2   3259.91   3591.08     83.26 o
  -9   5   2     54.94     40.24     32.35 <
  -8   5   2   8855.75   8893.78    126.61 o
  -7   5   2    690.02    742.32     33.24 o
  -6   5   2   8318.72   8507.73     96.71 o
  -5   5   2    881.04    916.06     22.34 o
  -4   5   2  16296.20  16459.70    162.51 o
  -3   5   2    299.98    242.99     12.56 o
  -2   5   2  34457.40  37511.50    366.38 o
  -1   5   2   1770.68   1908.37     31.79 o
   0   5   2  34859.10  39203.20    411.95 o
   1   5   2   1768.76   1929.93     28.90 o
   2   5   2  32864.20  36862.40    367.82 o
   3   5   2    638.86    548.57     17.45 o
   4   5   2  16044.60  15921.10    167.18 o
   5   5   2   1471.31   1440.50     30.57 o
   6   5   2   8755.48   8916.68    115.72 o
   7   5   2    369.82    316.91     27.23 o
   8   5   2  10066.30  10085.10    144.73 o
   9   5   2     38.00    168.40     34.79 o
  10   5   2   3942.37   4455.00     99.15 o
  11   5   2     23.90    361.93     55.02 o
 -10   6   2    622.49    715.08     58.80 o
  -9   6   2    223.64    270.00     41.02 o
  -8   6   2   1050.85   1118.36     49.69 o
  -7   6   2    360.01    359.26     34.35 o
  -6   6   2   2985.79   2883.67     54.02 o
  -5   6   2    547.99    521.33     20.68 o
  -4   6   2   3488.55   3317.63     43.80 o
  -3   6   2   1568.19   1553.44     25.23 o
  -2   6   2   1603.66   1579.45     25.23 o
  -1   6   2   2765.34   2801.41     38.35 o
   0   6   2   4591.51   4639.64     56.02 o
   1   6   2   3091.37   3070.86     38.68 o
   2   6   2   1335.40   1453.95     24.79 o
   3   6   2   2194.09   1944.60     32.46 o
   4   6   2   2053.74   2381.12     37.35 o
   5   6   2    942.02    912.28     26.79 o
   6   6   2   3100.32   2982.93     49.91 o
   7   6   2    246.12    241.10     25.23 o
   8   6   2    790.68    825.68     39.02 o
   9   6   2    172.50    187.41     34.57 o
  10   6   2    380.53    372.60     46.13 o
 -10   7   2   3187.75   3484.70     94.15 o
  -9   7   2    164.44    163.18     43.46 o
  -8   7   2   5214.46   5134.74    104.60 o
  -7   7   2    108.79     81.26     31.90 <
  -6   7   2   9304.44   9238.04    131.50 o
  -5   7   2    554.88    540.67     25.68 o
  -4   7   2  12321.20  13143.90    130.83 o
  -3   7   2    432.72    490.88     16.78 o
  -2   7   2  30212.20  34538.70    324.14 o
  -1   7   2    611.66    818.24     19.45 o
   0   7   2  16856.80  18283.20    193.53 o
   1   7   2    686.27    812.90     19.34 o
   2   7   2  31262.50  35250.20    335.48 o
   3   7   2    380.01    404.17     17.79 o
   4   7   2  13114.40  13744.40    156.07 o
   5   7   2    267.66    249.99     20.01 o
   6   7   2   9907.20   9691.45    118.16 o
   7   7   2    241.39    237.77     27.23 o
   8   7   2   5556.03   5525.90     89.48 o
   9   7   2    105.09    220.54     35.90 o
  10   7   2   3384.38   3684.12     92.15 o
 -10   8   2    487.83    604.15     71.25 o
  -9   8   2    310.91    473.20     50.58 o
  -8   8   2   1169.70   1254.53     57.69 o
  -7   8   2    498.48    472.42     39.24 o
  -6   8   2   1899.65   1809.66     57.47 o
  -5   8   2    535.20    478.09     25.23 o
  -4   8   2   1406.31   1417.05     27.90 o
  -3   8   2   1643.67   1596.68     29.23 o
  -2   8   2   1779.24   1826.66     30.12 o
  -1   8   2   4582.44   4583.39     56.25 o
   0   8   2   1538.76   1484.52     27.57 o
   1   8   2   4507.89   4576.61     56.13 o
   2   8   2   1993.19   1912.48     30.46 o
   3   8   2   1413.15   1412.27     25.79 o
   4   8   2   1834.09   1694.94     34.57 o
   5   8   2    575.82    477.65     28.01 o
   6   8   2   1781.09   1757.97     43.02 o
   7   8   2    714.45    689.29     35.35 o
   8   8   2    727.58    654.83     35.57 o
   9   8   2    512.56    601.37     47.46 o
  10   8   2    334.03    307.24     54.36 o
  -9   9   2    148.52    148.17     56.13 <
  -8   9   2   5093.10   5272.68    122.39 o
  -7   9   2     69.29    132.83     38.02 o
  -6   9   2   6541.19   6495.65    123.83 o
  -5   9   2    243.41    207.76     24.34 o
  -4   9   2  13176.60  13282.40    158.73 o
  -3   9   2    829.63    874.04     27.01 o
  -2   9   2   9813.59   9848.18    116.61 o
  -1   9   2    704.93   1002.09     25.57 o
   0   9   2  19323.00  21398.50    233.32 o
   1   9   2   1003.22   1172.39     26.23 o
   2   9   2   9687.29   9867.97    106.04 o
   3   9   2    379.37    403.84     18.79 o
   4   9   2  13951.90  13683.60    163.96 o
   5   9   2    105.74    100.04     24.45 o
   6   9   2   6695.51   6826.46    108.93 o
   7   9   2     55.64     23.68     30.12 <
   8   9   2   5068.98   5268.57     93.37 o
   9   9   2     64.21    222.98     57.36 o
  -9  10   2    443.72    723.86     76.48 o
  -8  10   2    595.50    545.01     61.47 o
  -7  10   2    741.08    674.95     58.36 o
  -6  10   2    748.09    861.81     54.13 o
  -5  10   2    975.64    941.51     37.68 o
  -4  10   2   1028.70   1201.29     36.02 o
  -3  10   2   2554.86   2649.01     49.69 o
  -2  10   2   1282.54   1484.30     33.13 o
  -1  10   2   1300.77   1357.58     31.35 o
   0  10   2   2050.60   2135.46     36.90 o
   1  10   2   1468.91   1396.93     31.46 o
   2  10   2   1944.97   1836.67     36.13 o
   3  10   2   2881.56   2736.72     45.91 o
   4  10   2   1158.61   1192.28     36.24 o
   5  10   2   1085.62   1077.01     41.68 o
   6  10   2    635.30    762.99     39.79 o
   7  10   2    939.08    949.96     51.24 o
   8  10   2    431.77    433.96     47.13 o
   9  10   2    650.17    829.69     77.48 o
  -8  11   2   3880.16   3971.02    125.94 o
  -7  11   2    267.63    195.08     48.47 o
  -6  11   2   5076.86   4641.19    105.49 o
  -5  11   2    299.63    293.68     30.46 o
  -4  11   2   9207.10   9499.26    122.05 o
  -3  11   2     84.47     96.26     21.34 o
  -2  11   2   7161.81   7286.76     99.38 o
  -1  11   2    758.55    810.23     28.01 o
   0  11   2   9866.02   9877.64    119.27 o
   1  11   2    412.17    576.13     24.45 o
   2  11   2   7143.17   7063.45     94.04 o
   3  11   2    186.91    158.73     20.90 o
   4  11   2   9632.51   9915.43    126.05 o
   5  11   2    177.65    217.87     31.68 o
   6  11   2   5128.34   4827.83     89.48 o
   7  11   2    119.84     64.58     37.57 <
   8  11   2   3918.69   4294.16    110.38 o
  -7  12   2    758.67    763.99     72.36 o
  -6  12   2    827.94    840.36     66.14 o
  -5  12   2    930.08    920.17     42.24 o
  -4  12   2    718.81    756.99     34.90 o
  -3  12   2   1235.89   1329.45     41.02 o
  -2  12   2   1377.19   1557.11     42.35 o
  -1  12   2   1729.37   1787.31     45.24 o
   0  12   2    877.21   1010.10     32.90 o
   1  12   2   2227.50   1989.73     45.57 o
   2  12   2    895.08   1093.91     36.13 o
   3  12   2   1660.06   1601.68     43.46 o
   4  12   2    950.38   1055.67     37.57 o
   5  12   2    954.31    996.53     49.80 o
   6  12   2    570.92    564.24     45.80 o
   7  12   2    954.86   1066.68     62.14 o
  -7  13   2    304.48    197.42     64.03 o
  -6  13   2   4971.67   4688.21    122.05 o
  -5  13   2    189.62    227.10     35.24 o
  -4  13   2   3327.75   3183.57     66.36 o
  -3  13   2    161.45    162.74     27.68 o
  -2  13   2   6143.39   6290.12     96.60 o
  -1  13   2     98.40    103.38     23.01 o
   0  13   2   7110.78   7359.13    107.04 o
   1  13   2     64.05     56.80     21.12 <
   2  13   2   6740.83   6587.91     99.49 o
   3  13   2    312.96    345.70     28.57 o
   4  13   2   3928.72   3659.89     74.59 o
   5  13   2    101.98    119.27     35.90 o
   6  13   2   5198.66   5071.15    113.60 o
   7  13   2    135.18    155.51     54.80 <
  -6  14   2    746.61    676.73     63.36 o
  -5  14   2   1602.80   1639.92     66.58 o
  -4  14   2    704.97    724.64     42.13 o
  -3  14   2    833.32    816.68     38.46 o
  -2  14   2    473.05    506.88     32.68 o
  -1  14   2   1704.65   1873.91     51.58 o
   0  14   2    664.24    801.67     35.01 o
   1  14   2   1574.36   1698.61     49.13 o
   2  14   2    605.64    715.86     35.35 o
   3  14   2    899.93    779.44     38.24 o
   4  14   2    816.71    843.58     46.24 o
   5  14   2   1703.81   1748.97     64.69 o
   6  14   2    525.04    553.90     57.91 o
  -4  15   2   3469.38   3411.45     80.48 o
  -3  15   2    342.91    350.04     35.24 o
  -2  15   2   4629.00   4565.94     84.93 o
  -1  15   2    256.86    353.48     33.24 o
   0  15   2   4117.19   4173.77     78.14 o
   1  15   2    299.70    317.80     32.79 o
   2  15   2   5210.11   4997.23     96.60 o
   3  15   2    203.88    252.00     34.68 o
   4  15   2   3858.45   3578.30     85.70 o
  -2  16   2    655.84    617.60     41.80 o
  -1  16   2   1118.48   1196.17     50.13 o
   0  16   2    416.70    405.17     36.46 o
   1  16   2   1147.70   1160.94     50.58 o
   2  16   2    456.98    542.45     41.46 o
 -11   0   3   3965.41   4434.44    143.51 o
  -9   0   3   6802.57   7534.42    190.08 o
  -7   0   3   8899.68   9261.05    208.98 o
  -5   0   3  38970.60  38297.40    636.94 o
  -3   0   3  16159.70  16259.10    297.79 o
  -1   0   3  33164.90  31972.20    512.66 o
   1   0   3  38827.90  35332.30    474.87 o
   3   0   3  14993.30  15103.50    213.42 o
   5   0   3  34480.90  33718.50    522.67 o
   7   0   3  12282.90  11960.10    203.20 o
   9   0   3   5520.11   5846.82    140.06 o
  11   0   3   4037.45   4250.69    131.28 o
 -11   1   3    135.54    120.72     52.36 <
 -10   1   3     81.37    340.92     47.91 o
  -9   1   3    558.44    653.39     53.47 o
  -8   1   3    181.65    172.52     39.35 o
  -7   1   3    173.90    276.23     28.01 o
  -6   1   3    185.50    178.08     22.57 o
  -5   1   3   2005.93   2133.35     40.02 o
  -4   1   3    575.82    597.03     26.90 o
  -3   1   3    635.93    660.61     19.90 o
  -2   1   3   3140.03   3023.40     36.02 o
  -1   1   3    969.86    967.86     18.45 o
   0   1   3     39.95      7.11      6.34 <
   1   1   3   1238.91   1109.47     17.45 o
   2   1   3   2718.19   2716.49     31.12 o
   3   1   3    322.10    265.78     11.45 o
   4   1   3   1040.95   1121.25     24.01 o
   5   1   3   1813.12   1849.01     31.68 o
   6   1   3    201.19    194.42     18.45 o
   7   1   3     79.87     46.46     20.12 <
   8   1   3    376.04    346.81     31.12 o
   9   1   3   1036.97   1071.34     45.13 o
  10   1   3     88.82    340.92     38.46 o
  11   1   3    309.11    446.19     47.69 o
 -11   2   3   3607.95   4018.93    102.71 o
 -10   2   3     89.20    347.59     46.80 o
  -9   2   3   7073.41   7683.26    136.84 o
  -8   2   3    193.07    233.54     34.57 o
  -7   2   3  13492.60  13273.60    172.96 o
  -6   2   3    370.39    296.46     23.12 o
  -5   2   3  17923.40  18119.00    206.76 o
  -4   2   3    612.21    599.70     22.68 o
  -3   2   3  31853.10  31706.20    358.26 o
  -2   2   3    860.99    897.49     16.67 o
  -1   2   3  30390.70  27603.90    281.12 o
   0   2   3      1.26    -29.46      6.34 <
   1   2   3  23389.50  24129.10    227.43 o
   2   2   3   1237.72   1163.72     17.01 o
   3   2   3  31449.90  31915.00    318.80 o
   4   2   3    313.51    254.44     14.12 o
   5   2   3  18900.60  19057.20    190.86 o
   6   2   3    195.29     49.58     14.90 o
   7   2   3  11412.40  11101.30    134.61 o
   8   2   3     94.85     18.12     23.79 <
   9   2   3   7531.79   8165.69    131.39 o
  10   2   3     60.63    149.73     34.24 o
  11   2   3   3560.26   4066.06     91.04 o
 -11   3   3    143.60    117.27     51.36 <
 -10   3   3    190.86    407.62     49.47 o
  -9   3   3    370.71    288.79     41.13 o
  -8   3   3    333.15    163.07     32.24 o
  -7   3   3    195.37    209.65     29.90 o
  -6   3   3    245.32    201.31     19.56 o
  -5   3   3     14.12     10.78     14.45 <
  -4   3   3    582.44    529.00     19.79 o
  -3   3   3   3946.31   4640.97     53.91 o
  -2   3   3    450.54    349.70     13.78 o
  -1   3   3   1754.03   1877.46     26.01 o
   0   3   3    110.58    107.38      8.89 o
   1   3   3   1756.89   1823.33     23.79 o
   2   3   3   1024.78    849.69     17.23 o
   3   3   3   5529.43   5679.86     69.03 o
   4   3   3   1322.43   1306.78     29.12 o
   5   3   3     27.99     25.79     14.45 <
   6   3   3    117.41     51.13     17.45 <
   7   3   3    335.73    332.03     23.79 o
   8   3   3    754.04    875.82     39.24 o
   9   3   3    328.48    280.79     33.13 o
  10   3   3     83.30    133.72     38.24 o
  11   3   3    320.01    377.38     46.91 o
 -11   4   3   3112.53   3608.87    104.27 o
 -10   4   3     11.28    183.30     47.13 o
  -9   4   3   6529.36   6473.19    110.38 o
  -8   4   3     94.68     22.12     29.68 <
  -7   4   3  11421.40  11401.40    152.51 o
  -6   4   3     29.70      5.78     18.79 <
  -5   4   3  14913.40  14720.30    160.62 o
  -4   4   3    327.58    337.03     16.01 o
  -3   4   3  29237.10  28608.20    282.68 o
  -2   4   3     70.61     51.24     12.01 o
  -1   4   3  19396.80  19226.30    199.64 o
   0   4   3      8.51     -6.11     10.45 <
   1   4   3  17928.60  18835.40    190.75 o
   2   4   3     30.20      4.00     10.12 <
   3   4   3  25511.80  26607.10    263.89 o
   4   4   3    214.47    199.20     14.90 o
   5   4   3  15291.10  15255.00    176.19 o
   6   4   3     60.79     25.79     17.45 <
   7   4   3  10883.10  11162.70    137.06 o
   8   4   3    118.36     72.03     26.79 <
   9   4   3   6231.21   6305.68    112.16 o
  10   4   3     20.43    117.72     37.68 o
  11   4   3   2976.61   3425.23     90.15 o
 -10   5   3    174.37    323.69     52.58 o
  -9   5   3     40.17      9.34     34.90 <
  -8   5   3    242.47    180.74     34.13 o
  -7   5   3    693.29    628.16     35.35 o
  -6   5   3    136.50    160.29     21.01 o
  -5   5   3    330.02    326.47     16.67 o
  -4   5   3    526.29    550.68     17.79 o
  -3   5   3   2005.18   2529.07     34.35 o
  -2   5   3    781.74    841.02     18.79 o
  -1   5   3   1782.61   2323.99     33.13 o
   0   5   3   2470.37   2331.66     38.68 o
   1   5   3   3020.68   3123.66     43.91 o
   2   5   3   1501.31   1371.14     24.45 o
   3   5   3   3257.26   3281.84     42.57 o
   4   5   3    229.92    214.65     14.90 o
   5   5   3    587.72    594.92     23.23 o
   6   5   3    133.62    129.28     20.68 o
   7   5   3    788.11    695.52     30.01 o
   8   5   3    472.62    643.27     33.90 o
   9   5   3     81.37     42.35     33.13 <
  10   5   3    254.27    478.87     47.91 o
 -10   6   3     18.09    148.51     51.80 <
  -9   6   3   4091.57   4338.84     92.04 o
  -8   6   3    200.04    184.74     34.90 o
  -7   6   3   9870.83   9614.42    144.17 o
  -6   6   3     95.85     59.47     22.68 <
  -5   6   3   9729.16   9428.90     98.04 o
  -4   6   3    165.01    113.27     14.01 o
  -3   6   3  15326.00  15798.90    156.29 o
  -2   6   3     75.72     56.25     11.00 o
  -1   6   3  22099.60  22628.70    253.11 o
   0   6   3    303.97    394.28     17.23 o
   1   6   3  20379.60  22023.00    231.21 o
   2   6   3     49.86     53.02     10.67 o
   3   6   3  15846.10  16304.50    175.74 o
   4   6   3    136.65    104.82     15.23 o
   5   6   3  10310.00   9862.86    124.94 o
   6   6   3    172.65    143.73     21.79 o
   7   6   3   8892.70   9085.64    116.94 o
   8   6   3    405.32    389.28     33.57 o
   9   6   3   4310.17   4575.39     84.37 o
  10   6   3     15.84     59.91     42.57 <
 -10   7   3    278.58    490.65     58.02 o
  -9   7   3     37.98    -35.57     37.79 <
  -8   7   3    381.11    472.64     42.46 o
  -7   7   3    961.01    685.07     38.13 o
  -6   7   3    336.25    276.23     28.01 o
  -5   7   3    529.89    589.36     22.23 o
  -4   7   3    840.49    662.39     21.45 o
  -3   7   3    286.98    311.69     14.23 o
  -2   7   3    774.96    776.89     19.79 o
  -1   7   3   1661.66   1803.10     31.35 o
   0   7   3   1471.10   1437.06     27.79 o
   1   7   3   1410.21   1611.24     27.68 o
   2   7   3   1536.17   1349.35     24.79 o
   3   7   3    482.58    521.33     18.56 o
   4   7   3    395.58    236.54     18.12 o
   5   7   3    522.82    487.10     24.57 o
   6   7   3    515.83    435.52     26.68 o
   7   7   3   1830.93   1732.18     44.57 o
   8   7   3    209.80    195.42     29.68 o
   9   7   3     86.76     62.47     33.79 <
  10   7   3    223.31    367.38     53.24 o
 -10   8   3     40.15    214.87     59.25 o
  -9   8   3   4082.52   4201.34     97.60 o
  -8   8   3    192.80    148.73     41.35 o
  -7   8   3   6127.21   6222.20    111.27 o
  -6   8   3    285.46    278.90     28.46 o
  -5   8   3   8828.65   8719.15    104.49 o
  -4   8   3   1169.80   1151.04     30.46 o
  -3   8   3  11619.20  11371.70    127.72 o
  -2   8   3     58.84     63.36     12.78 o
  -1   8   3  14740.90  15408.20    172.74 o
   0   8   3    303.35    394.72     17.67 o
   1   8   3  16231.90  16659.90    179.52 o
   2   8   3     26.40      8.89     11.34 <
   3   8   3  10658.40  10968.10    113.71 o
   4   8   3   1045.16   1019.99     28.35 o
   5   8   3   8780.38   8868.21    112.94 o
   6   8   3    255.03    261.33     27.01 o
   7   8   3   6653.77   6795.00     92.37 o
   8   8   3     91.34     25.57     27.79 <
   9   8   3   4313.88   4382.86     87.59 o
  10   8   3     60.49    115.49     51.69 <
  -9   9   3    162.37    185.52     57.58 o
  -8   9   3    579.53    679.18     62.69 o
  -7   9   3     33.89     14.45     35.57 <
  -6   9   3    666.98    601.03     39.91 o
  -5   9   3    939.19    988.42     38.13 o
  -4   9   3    917.14    746.87     31.01 o
  -3   9   3     50.84     58.14     17.23 o
  -2   9   3   1054.03   1209.18     30.79 o
  -1   9   3   1084.48   1396.04     28.23 o
   0   9   3    900.11    888.49     25.46 o
   1   9   3   1259.20   1450.84     30.90 o
   2   9   3   1478.83   1386.92     30.79 o
   3   9   3     75.42     84.59     15.78 o
   4   9   3    427.02    289.23     22.68 o
   5   9   3   1181.65   1316.89     40.68 o
   6   9   3    980.81    979.53     40.13 o
   7   9   3     58.75     41.24     29.12 <
   8   9   3    302.39    328.14     34.57 o
   9   9   3    359.64    322.92     48.58 o
  -9  10   3   5058.92   4987.01    147.95 o
  -8  10   3     87.18    129.94     57.58 <
  -7  10   3   3974.20   4022.60     94.48 o
  -6  10   3    226.09    231.10     34.68 o
  -5  10   3   9356.61   9229.81    144.06 o
  -4  10   3     43.58     51.69     21.79 <
  -3  10   3   8387.94   8822.53    108.93 o
  -2  10   3    134.42    201.09     20.12 o
  -1  10   3   8361.03   8690.58    108.93 o
   0  10   3     54.33     38.02     14.90 <
   1  10   3   8527.39   8808.85    106.82 o
   2  10   3    293.61    328.25     20.45 o
   3  10   3   9879.70   9738.92    117.61 o
   4  10   3     35.10     39.24     20.56 <
   5  10   3   8974.27   8907.90    129.50 o
   6  10   3    149.26    108.16     29.79 o
   7  10   3   4804.67   4872.63     96.26 o
   8  10   3    183.82    207.53     46.13 o
   9  10   3   4749.68   4872.63    156.07 o
  -8  11   3    984.97   1084.68     72.48 o
  -7  11   3     57.75     10.45     44.24 <
  -6  11   3    840.52    840.91     52.24 o
  -5  11   3    358.99    335.92     34.13 o
  -4  11   3    840.66    737.31     31.90 o
  -3  11   3    193.77    175.74     23.57 o
  -2  11   3   2272.93   2045.98     46.58 o
  -1  11   3    607.96    628.82     27.46 o
   0  11   3   1760.21   1790.20     40.24 o
   1  11   3    463.15    569.02     26.34 o
   2  11   3   1156.69   1323.78     37.13 o
   3  11   3     92.98     69.81     20.23 o
   4  11   3   1658.40   1552.44     43.57 o
   5  11   3    637.84    640.60     38.46 o
   6  11   3    395.23    276.56     33.24 o
   7  11   3    114.03    216.54     39.46 o
   8  11   3    859.36    960.08     59.91 o
  -7  12   3   4558.12   4334.51    117.38 o
  -6  12   3    129.50     84.70     41.91 <
  -5  12   3   5078.93   4829.16     91.59 o
  -4  12   3    258.01    210.31     26.90 o
  -3  12   3   5540.21   5784.12     90.26 o
  -2  12   3     81.95     60.36     22.79 <
  -1  12   3   7392.29   7648.25    105.16 o
   0  12   3     25.47     71.70     19.90 o
   1  12   3   8754.95   8540.85    115.05 o
   2  12   3     60.76     44.13     19.90 <
   3  12   3   6499.38   6367.71     92.48 o
   4  12   3    113.09     84.37     25.23 o
   5  12   3   4841.58   4799.71     93.82 o
   6  12   3    158.83    150.51     34.57 o
   7  12   3   4461.87   4297.27    110.16 o
  -7  13   3    217.10    149.29     52.36 <
  -6  13   3   1390.47   1368.69     69.03 o
  -5  13   3    109.97     32.57     32.24 <
  -4  13   3   1330.59   1432.83     48.47 o
  -3  13   3    361.88    359.60     32.01 o
  -2  13   3   1511.99   1420.16     46.13 o
  -1  13   3     81.24     43.13     23.01 <
   0  13   3   1503.59   1662.26     44.91 o
   1  13   3     56.11     49.80     22.34 <
   2  13   3   1104.71   1279.77     41.02 o
   3  13   3    319.78    301.46     27.90 o
   4  13   3   1597.42   1559.11     52.02 o
   5  13   3     77.30     58.91     34.01 <
   6  13   3   1230.49   1299.00     61.58 o
  -5  14   3   3731.59   3490.26     88.70 o
  -4  14   3     36.47     37.90     29.35 <
  -3  14   3   5084.03   4797.48     87.26 o
  -2  14   3     21.86    -16.56     24.34 <
  -1  14   3   5870.33   5846.60     96.82 o
   0  14   3      9.11     22.12     23.34 <
   1  14   3   5324.57   5460.10     92.04 o
   2  14   3     14.41      4.11     24.01 <
   3  14   3   4341.05   4410.43     78.48 o
   4  14   3     82.06     33.24     32.90 <
   5  14   3   3416.05   3256.49     83.37 o
  -4  15   3   1386.67   1430.72     57.91 o
  -3  15   3    380.90    358.15     38.57 o
  -2  15   3   1432.30   1643.81     53.58 o
  -1  15   3     85.45     97.26     28.90 o
   0  15   3   1566.16   1622.24     51.02 o
   1  15   3    128.05    114.16     27.57 o
   2  15   3   1655.78   1727.40     52.80 o
   3  15   3    350.79    407.73     38.35 o
   4  15   3   1552.97   1666.04     66.14 o
  -2  16   3     35.92     78.70     32.12 <
  -1  16   3   3600.73   3484.37     77.37 o
   0  16   3     65.05     62.03     29.90 <
   1  16   3   3411.89   3330.64     75.14 o
   2  16   3     36.70     75.59     32.90 <
 -10   0   4   2843.60   2523.85    106.49 o
  -8   0   4   2498.37   2795.74     91.93 o
  -6   0   4   8755.17   8818.19    166.96 o
  -4   0   4  10354.50  10679.20    194.42 o
  -2   0   4   3772.78   4040.72     72.81 o
   0   0   4 103202.00  98608.10   1173.50 o
   2   0   4   6065.78   5569.26     80.15 o
   4   0   4  12307.50  11083.20    160.96 o
   6   0   4   9907.16   9485.47    163.29 o
   8   0   4   3691.39   3773.38     86.70 o
  10   0   4   3669.17   3630.99    107.71 o
 -11   1   4     40.32    557.13     57.58 o
 -10   1   4   2749.16   3071.97     86.26 o
  -9   1   4    148.44    378.49     42.46 o
  -8   1   4   6148.77   6178.74    103.82 o
  -7   1   4     28.58     87.04     27.46 o
  -6   1   4   9405.66   9102.64    123.05 o
  -5   1   4    141.72    199.64     20.90 o
  -4   1   4  18359.10  18061.90    229.76 o
  -3   1   4    324.42    348.93     18.56 o
  -2   1   4  16793.90  15296.10    159.51 o
  -1   1   4   2916.83   2748.72     35.35 o
   0   1   4   3685.68   3114.55     32.35 o
   1   1   4   2508.33   2510.40     29.01 o
   2   1   4  16145.70  15091.50    149.40 o
   3   1   4    151.44    113.83     11.00 o
   4   1   4  17620.40  17302.80    176.96 o
   5   1   4    227.18    368.82     17.01 o
   6   1   4   8533.61   8263.62     99.26 o
   7   1   4     63.47     59.58     20.90 <
   8   1   4   6149.22   5617.61     80.37 o
   9   1   4    183.37    171.18     30.01 o
  10   1   4   2069.38   1968.95     59.25 o
  11   1   4     36.00     14.90     39.46 <
 -11   2   4    145.77    193.41     51.13 o
 -10   2   4   2059.44   1999.07     67.14 o
  -9   2   4     52.94     39.79     39.91 <
  -8   2   4   3446.53   3509.27     72.48 o
  -7   2   4     63.60     89.59     29.12 o
  -6   2   4   7373.44   7962.16    114.94 o
  -5   2   4    109.24    121.50     21.56 o
  -4   2   4  11711.10  11366.20    133.72 o
  -3   2   4    562.81    693.74     19.67 o
  -2   2   4  17982.10  19213.10    200.20 o
  -1   2   4   2748.62   2738.83     33.68 o
   0   2   4  11967.30  11415.40    106.38 o
   1   2   4   2420.64   2414.03     27.46 o
   2   2   4  23795.00  22323.50    219.54 o
   3   2   4    942.86    857.03     18.34 o
   4   2   4  11556.20  11032.20    110.94 o
   5   2   4     64.82     33.57     12.78 <
   6   2   4   8777.11   8891.67     96.82 o
   7   2   4     56.25     41.57     22.12 <
   8   2   4   4639.21   4561.60     69.70 o
   9   2   4    116.62    239.66     32.12 o
  10   2   4   2922.71   3078.09     74.70 o
  11   2   4     98.57    407.17     46.46 o
 -11   3   4     34.65    491.43     60.14 o
 -10   3   4   3213.54   3351.98     91.82 o
  -9   3   4    143.90    348.04     44.57 o
  -8   3   4   4858.03   4835.72     96.49 o
  -7   3   4     44.75     90.15     30.24 <
  -6   3   4   6737.22   6221.31     98.60 o
  -5   3   4     59.42     78.81     18.90 o
  -4   3   4  11105.70  11296.00    137.17 o
  -3   3   4      3.25     27.23     12.67 <
  -2   3   4  18355.20  18225.40    186.41 o
  -1   3   4   1823.16   1751.30     25.68 o
   0   3   4  11731.90  11081.20    111.49 o
   1   3   4    788.66   1003.20     20.90 o
   2   3   4  16689.20  17344.30    164.18 o
   3   3   4      3.95     38.68     11.00 o
   4   3   4  12526.20  12210.90    140.95 o
   5   3   4    132.03    146.06     16.56 o
   6   3   4   5595.74   5523.90     68.70 o
   7   3   4     79.82    106.27     19.79 o
   8   3   4   3714.72   3615.31     60.14 o
   9   3   4    321.52    324.25     32.68 o
  10   3   4   2920.72   2880.11     73.03 o
  11   3   4     56.39     91.93     42.02 <
 -11   4   4     53.67    124.28     56.69 <
 -10   4   4   1732.27   1658.04     76.14 o
  -9   4   4     91.71    162.96     45.46 o
  -8   4   4   5130.69   4985.45     99.04 o
  -7   4   4    809.37    842.47     40.80 o
  -6   4   4   4014.83   4130.42     69.81 o
  -5   4   4    182.51    148.06     17.12 o
  -4   4   4   7295.40   7742.85     87.59 o
  -3   4   4    111.79     71.36     12.34 o
  -2   4   4  19376.20  19245.20    192.75 o
  -1   4   4   1301.13   1183.28     21.23 o
   0   4   4   8915.24   9356.31     98.38 o
   1   4   4    594.33    549.01     15.90 o
   2   4   4  19255.70  19377.30    182.74 o
   3   4   4    220.91    191.19     13.23 o
   4   4   4   9063.64   8856.99    106.93 o
   5   4   4    411.96    436.85     22.01 o
   6   4   4   4157.00   4418.99     64.03 o
   7   4   4    350.31    179.41     23.45 o
   8   4   4   5896.50   5835.48     89.93 o
   9   4   4    106.33    268.23     37.68 o
  10   4   4   2689.56   2856.99     73.92 o
 -10   5   4   2736.81   2835.09     92.37 o
  -9   5   4     53.91    240.88     48.35 o
  -8   5   4   4178.53   4243.47     86.04 o
  -7   5   4    109.13     84.70     31.57 <
  -6   5   4   6500.74   6535.67     95.71 o
  -5   5   4    574.55    299.46     17.56 o
  -4   5   4  10602.10  10131.90    111.71 o
  -3   5   4    239.84    171.41     12.56 o
  -2   5   4   9128.63   9567.95    100.49 o
  -1   5   4    230.66    236.66     14.56 o
   0   5   4  17909.20  18678.50    223.76 o
   1   5   4    182.40    218.65     13.12 o
   2   5   4  10355.00  10683.30    100.60 o
   3   5   4    510.10    476.09     18.23 o
   4   5   4   8641.05   9004.05    105.93 o
   5   5   4   1296.48   1117.36     30.24 o
   6   5   4   5568.62   5802.35     82.26 o
   7   5   4    147.20    143.73     23.34 o
   8   5   4   3259.86   3544.84     63.80 o
   9   5   4     71.90     75.25     33.24 <
  10   5   4   2366.39   2481.17     80.15 o
 -10   6   4   1314.08   1391.59     75.03 o
  -9   6   4    292.00    367.93     45.46 o
  -8   6   4   3494.81   3578.63     75.48 o
  -7   6   4    490.43    396.61     36.24 o
  -6   6   4   4389.37   4327.62     71.81 o
  -5   6   4    467.23    392.17     22.79 o
  -4   6   4   5986.06   6161.17     71.92 o
  -3   6   4    565.92    500.77     17.23 o
  -2   6   4  11133.40  12408.20    129.28 o
  -1   6   4   1590.72   1468.85     29.12 o
   0   6   4   5135.03   4872.51     67.92 o
   1   6   4    916.71   1057.23     23.90 o
   2   6   4  13903.20  13992.90    132.95 o
   3   6   4    245.68    175.41     13.12 o
   4   6   4   6168.59   6428.18     76.70 o
   5   6   4    486.76    467.31     23.68 o
   6   6   4   5425.00   5367.61     76.48 o
   7   6   4    581.79    661.06     30.79 o
   8   6   4   4110.36   4140.65     70.92 o
   9   6   4    165.08    301.46     36.13 o
  10   6   4   1476.15   1982.06     71.59 o
 -10   7   4   2166.62   2374.34     99.60 o
  -9   7   4     74.88    161.40     43.35 o
  -8   7   4   3538.41   3705.13     78.37 o
  -7   7   4    190.13    150.29     33.35 o
  -6   7   4   8431.26   8281.41    117.16 o
  -5   7   4    157.01    118.61     21.34 o
  -4   7   4   6959.45   6756.54     81.03 o
  -3   7   4    472.10    475.65     17.79 o
  -2   7   4   8345.71   8017.85     90.37 o
  -1   7   4    363.27    401.28     18.34 o
   0   7   4  12353.00  12740.40    147.95 o
   1   7   4    464.71    540.56     18.56 o
   2   7   4   6419.05   7176.16     73.92 o
   3   7   4    205.37    158.85     12.89 o
   4   7   4   5400.68   5833.37     74.14 o
   5   7   4    244.06    234.65     23.34 o
   6   7   4   8002.69   8057.20    105.82 o
   7   7   4    303.41    274.12     28.01 o
   8   7   4   3021.57   3329.41     63.58 o
   9   7   4     51.98     61.92     35.13 <
  10   7   4   1792.88   2053.21     70.47 o
  -9   8   4    596.30    555.90     54.91 o
  -8   8   4   2252.23   2202.16     77.70 o
  -7   8   4    245.50    265.11     39.68 o
  -6   8   4   4476.42   4501.36     81.37 o
  -5   8   4    687.75    623.71     33.68 o
  -4   8   4   4847.55   5183.42     73.25 o
  -3   8   4   1555.39   1432.83     32.68 o
  -2   8   4   6155.67   6335.02     79.48 o
  -1   8   4   2634.34   3429.90     59.47 o
   0   8   4   5224.87   5526.35     73.03 o
   1   8   4   6045.54   5377.51     69.36 o
   2   8   4   6530.19   6695.84     76.14 o
   3   8   4    760.40    573.02     20.12 o
   4   8   4   6599.21   6387.27     78.81 o
   5   8   4    369.68    249.99     24.34 o
   6   8   4   5450.82   5378.95     81.48 o
   7   8   4    398.68    479.87     31.68 o
   8   8   4   2626.11   2570.09     57.25 o
   9   8   4    282.58    347.70     41.24 o
  -9   9   4    100.58    247.99     61.92 o
  -8   9   4   3626.47   3261.05     99.49 o
  -7   9   4    237.33    177.19     40.13 o
  -6   9   4   4480.87   4361.52     84.81 o
  -5   9   4    285.27    264.45     29.23 o
  -4   9   4   5873.67   5890.95     82.15 o
  -3   9   4    681.45    592.59     26.46 o
  -2   9   4   8384.46   8974.59    108.71 o
  -1   9   4    403.85    433.41     21.56 o
   0   9   4   8558.89   9377.54    118.61 o
   1   9   4    210.59    216.09     16.90 o
   2   9   4   9219.64   9635.32    115.05 o
   3   9   4    383.98    283.23     19.67 o
   4   9   4   5260.31   5521.57     75.92 o
   5   9   4    197.40    167.07     25.01 o
   6   9   4   3518.53   3655.44     67.14 o
   7   9   4    256.72    233.77     33.46 o
   8   9   4   2765.97   2673.02     70.47 o
   9   9   4    151.87    186.52     43.69 o
  -8  10   4   1792.86   1823.44     83.26 o
  -7  10   4    434.73    368.27     52.47 o
  -6  10   4   1886.00   1865.46     55.80 o
  -5  10   4    559.74    556.79     35.68 o
  -4  10   4   6051.89   6166.06     96.15 o
  -3  10   4   1490.32   1555.55     40.02 o
  -2  10   4   3377.47   3447.69     56.02 o
  -1  10   4   2930.78   2865.77     50.80 o
   0  10   4  10153.40  10437.10    132.17 o
   1  10   4   2570.58   2646.57     46.80 o
   2  10   4   2949.16   3159.79     52.58 o
   3  10   4   1287.17   1317.12     35.01 o
   4  10   4   6279.63   6330.91     87.82 o
   5  10   4    571.41    651.17     34.68 o
   6  10   4   2584.47   2615.33     59.91 o
   7  10   4    320.77    374.71     38.02 o
   8  10   4   2368.58   2402.80     78.26 o
  -8  11   4   2373.61   2108.56     90.82 o
  -7  11   4    304.23    282.68     50.80 o
  -6  11   4   3526.76   3491.15     81.37 o
  -5  11   4    384.12    288.23     33.13 o
  -4  11   4   4339.44   4310.61     76.37 o
  -3  11   4    964.67   1090.69     35.90 o
  -2  11   4   6984.96   7023.87     98.60 o
  -1  11   4    188.13    218.20     22.45 o
   0  11   4   7378.23   7753.07    101.26 o
   1  11   4    405.97    391.61     24.45 o
   2  11   4   5873.28   6416.50     91.37 o
   3  11   4   1134.11   1146.49     36.13 o
   4  11   4   4116.83   4213.01     74.81 o
   5  11   4    310.41    264.45     32.12 o
   6  11   4   3019.26   3027.95     67.36 o
   7  11   4    486.75    504.77     44.91 o
   8  11   4   2317.46   2261.29     75.81 o
  -7  12   4    897.03    950.07     70.47 o
  -6  12   4   2947.46   2954.48     80.26 o
  -5  12   4   1348.55   1369.25     52.80 o
  -4  12   4   3006.60   3074.53     64.03 o
  -3  12   4   1103.50   1075.68     38.13 o
  -2  12   4   4844.66   4663.43     77.59 o
  -1  12   4   2661.76   2266.74     48.02 o
   0  12   4   4356.03   4616.29     72.59 o
   1  12   4   1420.47   1640.36     43.13 o
   2  12   4   3722.05   4141.43     68.36 o
   3  12   4   1547.65   1427.27     40.91 o
   4  12   4   3242.65   3254.49     65.92 o
   5  12   4   1058.35    963.85     43.24 o
   6  12   4   3321.01   3063.19     69.25 o
   7  12   4    574.00    589.81     51.02 o
  -6  13   4   3085.90   2711.60     80.15 o
  -5  13   4    504.93    474.54     41.46 o
  -4  13   4   3267.35   3145.56     66.92 o
  -3  13   4    243.66    259.33     28.90 o
  -2  13   4   4023.72   3945.90     71.59 o
  -1  13   4   1113.24   1290.55     41.57 o
   0  13   4   4057.45   3854.86     68.92 o
   1  13   4   1131.62   1228.63     40.24 o
   2  13   4   3625.69   3689.68     67.47 o
   3  13   4    408.44    376.38     30.57 o
   4  13   4   3176.98   3029.84     68.70 o
   5  13   4    537.78    524.00     41.68 o
   6  13   4   2642.31   2509.07     77.14 o
  -5  14   4    968.69    869.59     56.25 o
  -4  14   4   2090.26   1986.51     60.91 o
  -3  14   4   1618.50   1699.83     55.47 o
  -2  14   4   3004.72   2917.02     64.92 o
  -1  14   4    831.16    899.05     37.57 o
   0  14   4   3049.31   2974.15     63.69 o
   1  14   4    949.60    935.17     39.91 o
   2  14   4   3172.65   3067.75     65.69 o
   3  14   4   1494.41   1498.41     48.69 o
   4  14   4   1908.46   1899.70     61.47 o
   5  14   4    786.48    790.11     53.36 o
  -4  15   4   2225.59   2113.90     71.47 o
  -3  15   4    554.26    574.80     42.46 o
  -2  15   4   2399.91   2411.69     59.69 o
  -1  15   4    663.20    653.28     36.57 o
   0  15   4   3030.41   2904.57     65.25 o
   1  15   4    649.44    607.70     37.35 o
   2  15   4   2155.36   2260.18     59.58 o
   3  15   4    555.96    520.78     39.35 o
   4  15   4   2306.43   2267.85     76.70 o
  -1  16   4    810.12    912.83     43.91 o
   0  16   4   1036.25   1037.66     48.13 o
   1  16   4    814.58    857.92     45.46 o
 -11   0   5    581.60   1091.57     94.82 o
  -9   0   5   1096.86   1108.47     81.92 o
  -7   0   5   3356.60   3479.59     92.26 o
  -5   0   5   1690.41   1651.70     55.36 o
  -3   0   5   4269.24   4092.63     80.81 o
  -1   0   5   3478.64   3066.52     53.58 o
   1   0   5   1694.59   1635.58     35.90 o
   3   0   5   3281.05   3547.84     65.36 o
   5   0   5    882.83    519.89     38.68 o
   7   0   5   2170.31   2009.96     55.25 o
   9   0   5    566.36    205.20     44.13 o
  11   0   5    250.72    144.95     59.91 <
 -11   1   5   3928.57   3915.77    116.94 o
 -10   1   5     42.40    151.73     44.80 o
  -9   1   5   5902.77   6035.01    110.60 o
  -8   1   5    129.14    164.18     34.90 o
  -7   1   5   9194.93   9344.97    148.17 o
  -6   1   5    605.26    593.70     32.90 o
  -5   1   5  23066.90  22888.50    281.23 o
  -4   1   5     20.71      1.11     18.12 <
  -3   1   5  21201.80  21210.70    224.21 o
  -2   1   5    548.33    551.68     18.01 o
  -1   1   5  56375.60  54958.10    532.89 o
   0   1   5      9.54    -13.45      7.56 <
   1   1   5  61635.90  57661.80    529.89 o
   2   1   5    392.64    339.37     14.56 o
   3   1   5  23042.20  22233.70    218.87 o
   4   1   5     14.95     -7.34     11.67 <
   5   1   5  21591.70  21020.20    209.76 o
   6   1   5    286.76    134.17     17.79 o
   7   1   5  10663.50  10136.40    121.50 o
   8   1   5     60.36     54.80     23.23 <
   9   1   5   5759.55   5743.66     94.15 o
  10   1   5     29.70    221.87     37.79 o
  11   1   5   4544.30   4640.75     98.60 o
 -11   2   5    551.41    707.08     65.25 o
 -10   2   5     42.04    411.17     60.14 o
  -9   2   5    500.32    734.98     52.80 o
  -8   2   5    257.27    250.22     38.35 o
  -7   2   5   2388.33   2594.21     61.69 o
  -6   2   5    560.37    598.92     33.46 o
  -5   2   5   3943.21   3740.26     64.69 o
  -4   2   5    348.22    440.52     22.57 o
  -3   2   5   3423.29   3242.93     41.80 o
  -2   2   5    508.46    626.93     19.23 o
  -1   2   5   1243.88   1204.85     21.12 o
   0   2   5      1.47     31.12      9.00 o
   1   2   5   2012.22   1854.45     26.12 o
   2   2   5    359.53    408.29     15.56 o
   3   2   5   2039.07   2310.87     40.24 o
   4   2   5    585.72    689.07     18.79 o
   6   2   5    478.04    484.32     20.68 o
   7   2   5   1136.95    570.02     47.69 o
   8   2   5    583.76    499.99     29.57 o
   9   2   5    217.17     78.92     28.57 <
  10   2   5     19.40     68.03     37.13 <
  11   2   5    237.81    120.50     41.46 <
 -11   3   5   2986.77   3137.67     94.37 o
 -10   3   5     13.35    201.42     53.69 o
  -9   3   5   6835.81   6888.04    136.50 o
  -8   3   5     88.95     60.91     39.79 <
  -7   3   5  12989.00  12720.70    182.85 o
  -6   3   5    176.90    250.88     28.01 o
  -5   3   5  14181.20  14666.20    191.75 o
  -4   3   5    329.13    296.68     18.34 o
  -3   3   5  30321.50  29995.00    305.46 o
  -2   3   5   1975.33   1861.68     29.23 o
  -1   3   5  28386.20  26719.00    250.66 o
   0   3   5      2.33     26.90     10.23 <
   1   3   5  26685.90  26203.40    244.44 o
   2   3   5   1418.07   1482.52     23.57 o
   3   3   5  30612.00  29808.20    286.45 o
   4   3   5    352.42    398.06     15.90 o
   5   3   5  16197.50  16070.60    156.62 o
   6   3   5     85.21     63.03     15.90 o
   7   3   5  12015.20  11821.60    131.83 o
   8   3   5    104.53    108.27     25.01 o
   9   3   5   8268.06   8253.51    122.94 o
  10   3   5      9.83    288.68     43.91 o
 -10   4   5    153.86    361.93     57.25 o
  -9   4   5    803.07    852.25     56.25 o
  -8   4   5    202.74    279.67     45.24 o
  -7   4   5    818.87    892.71     44.02 o
  -6   4   5    283.33    303.57     30.57 o
  -5   4   5   2886.99   3013.39     51.58 o
  -4   4   5   1080.54    956.85     24.79 o
  -3   4   5   1296.52   1200.73     26.12 o
  -2   4   5   1317.41   1292.22     23.23 o
  -1   4   5   5395.47   5105.73     55.58 o
   0   4   5      5.92     21.23     11.12 <
   1   4   5   4537.34   4508.03     50.91 o
   2   4   5    593.77    423.18     16.56 o
   3   4   5    691.14    444.08     15.90 o
   4   4   5    523.68    265.22     15.90 o
   5   4   5   1958.13   2128.90     40.91 o
   6   4   5    170.61    132.28     20.56 o
   7   4   5    363.27    152.18     23.79 o
   8   4   5    433.36    610.59     32.68 o
   9   4   5    411.38    189.86     35.90 o
  10   4   5    133.62    187.75     40.46 o
 -10   5   5     14.19     93.60     53.91 <
  -9   5   5   5709.22   5616.83    114.27 o
  -8   5   5    265.82    260.00     40.68 o
  -7   5   5  10624.70  10695.20    174.41 o
  -6   5   5    343.35    372.27     33.57 o
  -5   5   5  15396.80  15696.00    189.08 o
  -4   5   5    234.36    187.52     17.34 o
  -3   5   5  22490.70  23542.30    250.22 o
  -2   5   5    675.79    618.37     17.90 o
  -1   5   5  21492.30  22343.30    216.87 o
   0   5   5     91.41    103.82     12.23 o
   1   5   5  23187.20  23493.20    227.54 o
   2   5   5    485.48    401.50     15.01 o
   3   5   5  25174.10  25078.20    231.10 o
   4   5   5    497.07    516.33     19.79 o
   5   5   5  18087.50  17932.80    214.20 o
   6   5   5    173.28    144.95     22.34 o
   7   5   5  11267.20  11728.60    144.62 o
   8   5   5    248.90    208.76     29.12 o
   9   5   5   5814.41   5951.86    103.60 o
  10   5   5     22.11    320.36     47.46 o
 -10   6   5    128.08    392.17     59.91 o
  -9   6   5   1093.81   1129.70     62.58 o
  -8   6   5    343.91    377.05     44.24 o
  -7   6   5    327.65    346.04     37.46 o
  -6   6   5    363.02    319.91     32.24 o
  -5   6   5   1329.95   1211.18     32.57 o
  -4   6   5   1200.78   1172.72     29.35 o
  -3   6   5   2084.10   2213.05     33.24 o
  -2   6   5    828.27    825.57     21.12 o
  -1   6   5   2964.77   3441.13     48.58 o
   0   6   5   1887.03   1714.40     28.68 o
   1   6   5   3493.04   3794.83     47.35 o
   2   6   5   1379.29   1276.32     23.57 o
   3   6   5   1966.51   2017.30     29.46 o
   4   6   5    727.60    568.35     22.57 o
   5   6   5    976.82    882.82     32.01 o
   6   6   5    551.03    564.13     31.35 o
   7   6   5    158.55     48.69     22.57 <
   8   6   5    434.43    578.80     38.02 o
   9   6   5    510.87    251.66     37.57 o
  10   6   5    174.54    347.26     49.47 o
 -10   7   5    111.24    208.53     58.36 o
  -9   7   5   4117.54   4393.09    105.71 o
  -8   7   5    110.90    170.41     42.13 o
  -7   7   5   8917.67   8879.11    150.29 o
  -6   7   5     94.22     80.92     28.79 <
  -5   7   5  10428.90  10972.00    145.40 o
  -4   7   5    188.12    214.20     20.68 o
  -3   7   5  18589.20  19715.50    207.53 o
  -2   7   5    415.46    364.60     18.56 o
  -1   7   5  24089.00  26174.50    284.45 o
   0   7   5    239.39    256.44     17.67 o
   1   7   5  26202.90  27774.90    282.79 o
   2   7   5    867.78    800.78     20.34 o
   3   7   5  20199.30  20756.40    191.53 o
   4   7   5     80.84     59.03     16.90 o
   5   7   5  11423.30  12020.00    150.84 o
   6   7   5     43.19     41.35     26.12 <
   7   7   5   8669.30   9089.31    119.50 o
   8   7   5     96.28    117.94     31.46 o
   9   7   5   4542.32   4919.76     97.15 o
  10   7   5     50.23    323.03     48.02 o
  -9   8   5    565.67    557.90     61.25 o
  -8   8   5    438.38    546.01     54.58 o
  -7   8   5    963.92    883.26     52.13 o
  -6   8   5   1381.26    727.20     84.37 o
  -5   8   5    558.97    566.24     34.35 o
  -4   8   5   1907.01   1794.87     38.91 o
  -3   8   5   2217.18   2095.45     38.91 o
  -2   8   5   1453.18   1632.25     34.01 o
  -1   8   5   1215.53   1352.24     31.12 o
   0   8   5    521.91    590.25     22.23 o
   1   8   5    948.20   1151.04     29.90 o
   2   8   5   2346.13   2158.92     40.13 o
   3   8   5   1629.84   1780.42     30.68 o
   4   8   5   1383.47   1297.77     29.79 o
   5   8   5    508.38    502.88     27.79 o
   6   8   5   2830.03   2764.84     55.13 o
   7   8   5    414.75    251.88     30.46 o
   8   8   5    401.93    484.32     37.79 o
   9   8   5    269.38    182.52     40.02 o
  -9   9   5   4701.76   4128.87    110.38 o
  -8   9   5    107.97    131.83     48.47 <
  -7   9   5   5092.72   5102.72    115.38 o
  -6   9   5     89.53     99.04     34.01 <
  -5   9   5  12346.30  12522.50    180.19 o
  -4   9   5    441.35    454.53     29.79 o
  -3   9   5  16822.30  17103.70    200.09 o
  -2   9   5    103.10    137.84     20.12 o
  -1   9   5  15812.40  16270.50    189.41 o
   0   9   5    378.88    383.50     22.90 o
   1   9   5  15042.10  15944.70    191.53 o
   2   9   5    146.82    157.62     19.90 o
   3   9   5  14970.60  15619.60    183.19 o
   4   9   5    190.08    157.07     23.90 o
   5   9   5  11852.80  12202.00    156.18 o
   6   9   5     39.02     41.13     28.01 <
   7   9   5   6504.33   6711.96    107.71 o
   8   9   5    125.75     96.82     39.24 <
   9   9   5   4970.08   4883.96    106.93 o
  -8  10   5    790.46    791.22     61.58 o
  -7  10   5    861.67    889.16     59.14 o
  -6  10   5   1052.87    963.63     46.58 o
  -5  10   5    450.17    433.07     37.68 o
  -4  10   5   1270.73   1097.24     38.57 o
  -3  10   5   2103.17   2014.41     43.80 o
  -2  10   5   2139.74   2073.21     44.57 o
  -1  10   5    676.91    656.06     28.90 o
   0  10   5   1840.64   1868.79     42.24 o
   1  10   5    331.50    371.38     24.23 o
   2  10   5   2008.52   1946.49     42.46 o
   3  10   5   1354.92   1362.69     36.57 o
   4  10   5   1990.67   1913.26     43.57 o
   5  10   5    317.66    248.99     29.79 o
   6  10   5   1258.53   1213.63     46.13 o
   7  10   5    719.75    592.03     40.24 o
   8  10   5    901.05    841.69     57.80 o
  -8  11   5     43.01     36.68     50.02 <
  -7  11   5   4694.92   4334.06    101.38 o
  -6  11   5    457.25    342.92     40.68 o
  -5  11   5   8809.85   8169.03    136.06 o
  -4  11   5     88.64     36.02     25.34 <
  -3  11   5  10832.50  10962.20    143.39 o
  -2  11   5     94.84     77.92     22.57 o
  -1  11   5  11702.60  11709.30    149.29 o
   0  11   5    119.14    130.39     21.01 o
   1  11   5  11447.60  11517.60    146.95 o
   2  11   5     64.80     56.02     21.01 <
   3  11   5  11131.80  11078.80    142.95 o
   4  11   5    193.00    176.52     28.46 o
   5  11   5   8092.54   7960.60    122.83 o
   6  11   5    241.11    162.40     33.46 o
   7  11   5   5287.88   5139.74    101.93 o
   8  11   5     30.02     47.24     46.13 <
  -7  12   5    432.65    431.63     54.80 o
  -6  12   5    968.66    890.71     53.58 o
  -5  12   5    569.84    540.67     42.80 o
  -4  12   5   1540.83   1376.03     44.69 o
  -3  12   5    495.17    463.64     33.68 o
  -2  12   5   2549.07   2390.24     52.80 o
  -1  12   5    492.23    540.78     31.90 o
   0  12   5   2935.03   2951.03     57.25 o
   1  12   5    346.30    428.18     28.12 o
   2  12   5   1741.74   1803.43     46.35 o
   3  12   5    251.10    217.87     26.79 o
   4  12   5   2656.76   2262.41     54.25 o
   5  12   5    305.15    244.55     33.90 o
   6  12   5    806.75    727.75     46.02 o
   7  12   5    195.66    138.06     41.13 o
  -6  13   5    234.34    243.44     48.24 o
  -5  13   5   5385.84   5230.44    107.38 o
  -4  13   5     76.14     43.46     29.90 <
  -3  13   5   6819.74   6444.07    104.82 o
  -2  13   5    147.14    141.84     28.68 o
  -1  13   5   9017.21   9006.60    133.17 o
   0  13   5    191.16    192.64     26.57 o
   1  13   5   9504.88   9483.25    133.28 o
   2  13   5     88.58     67.36     24.01 <
   3  13   5   6460.09   6395.27    103.04 o
   4  13   5     41.69     35.24     30.12 <
   5  13   5   5418.90   5475.33    101.04 o
   6  13   5    109.17     99.60     41.13 <
  -5  14   5    278.67    222.87     43.57 o
  -4  14   5   1128.00   1039.66     49.35 o
  -3  14   5    115.21    117.16     33.35 o
  -2  14   5   1737.20   1851.12     57.47 o
  -1  14   5    533.45    585.47     34.68 o
   0  14   5   2546.46   2398.91     59.80 o
   1  14   5    396.63    467.64     34.13 o
   2  14   5   1768.95   1790.76     54.91 o
   3  14   5     53.78     44.02     30.68 <
   4  14   5   1228.61   1180.72     53.80 o
   5  14   5    253.88    164.85     43.13 o
  -3  15   5   5066.72   4962.00    100.38 o
  -2  15   5    140.29    140.73     36.13 o
  -1  15   5   5231.88   4872.18     85.70 o
   0  15   5     30.17     56.91     29.23 <
   1  15   5   4988.83   4843.84     92.15 o
   2  15   5    181.77    153.51     34.01 o
   3  15   5   5178.47   4836.94    102.15 o
 -10   0   6   4714.51   5093.50    172.41 o
  -8   0   6  10175.80  11146.40    238.10 o
  -6   0   6  11811.30  12986.00    263.45 o
  -4   0   6  26634.60  27076.30    431.52 o
  -2   0   6  39656.40  39116.20    520.78 o
   0   0   6  31317.70  31549.80    386.27 o
   2   0   6  42719.60  41683.30    570.35 o
   4   0   6  22154.60  23503.70    345.04 o
   6   0   6   9820.35  10225.20    165.51 o
   8   0   6  10700.10  10525.60    186.63 o
  10   0   6   4373.95   4309.83    128.50 o
 -11   1   6    113.43    103.49     61.58 <
 -10   1   6    924.32    791.67     65.03 o
  -9   1   6      5.81     78.26     44.35 <
  -8   1   6    968.97    659.84     46.24 o
  -7   1   6     35.02     68.92     33.57 <
  -6   1   6   2254.04   2375.01     66.03 o
  -5   1   6    106.16    137.17     24.34 o
  -4   1   6   3787.82   3796.72     52.47 o
  -3   1   6    297.69    293.68     18.01 o
  -2   1   6   2378.40   2631.23     35.68 o
  -1   1   6   1404.74   1438.39     22.68 o
   0   1   6  18179.00  17561.50    157.73 o
   1   1   6   1328.81   1243.08     22.79 o
   2   1   6   2883.31   3271.95     43.91 o
   3   1   6    496.23    473.42     18.23 o
   4   1   6   4161.49   4097.63     52.02 o
   5   1   6     94.96    101.93     15.34 o
   6   1   6   3580.43   3338.97     49.80 o
   7   1   6     77.92     77.37     21.90 o
   8   1   6   1906.63   1959.17     44.57 o
   9   1   6     10.88    167.74     29.57 o
  10   1   6   1293.69   1388.03     55.58 o
 -10   2   6   5228.94   5682.41    123.72 o
  -9   2   6      6.79    112.71     44.69 <
  -8   2   6   8372.02   8912.01    147.40 o
  -7   2   6    274.92    229.76     36.35 o
  -6   2   6  12975.60  12689.70    200.75 o
  -5   2   6     44.04     43.24     21.68 <
  -4   2   6  20292.20  21307.10    227.88 o
  -3   2   6     71.15     78.92     15.12 o
  -2   2   6  39677.10  38703.90    381.05 o
  -1   2   6   1969.38   1774.31     26.57 o
   0   2   6  40366.40  38454.10    323.92 o
   1   2   6    888.27    594.14     19.79 o
   2   2   6  35122.80  35034.60    352.04 o
   3   2   6     80.56     57.91     12.56 o
   4   2   6  22067.10  21725.70    221.32 o
   5   2   6     96.31     86.15     14.78 o
   6   2   6  11854.50  11809.90    126.50 o
   7   2   6    485.60    451.75     26.46 o
   8   2   6   7747.44   7464.06    100.49 o
   9   2   6      6.19     34.46     28.01 <
  10   2   6   5242.02   5452.32    102.93 o
 -10   3   6    604.37    348.93     59.14 o
  -9   3   6     21.20    109.05     46.46 <
  -8   3   6   1191.98    852.36     50.58 o
  -7   3   6    271.03    381.61     41.68 o
  -6   3   6   1134.04    921.50     38.46 o
  -5   3   6    443.26    431.74     28.57 o
  -4   3   6   2029.12   2256.07     55.69 o
  -3   3   6    245.76    263.00     16.78 o
  -2   3   6   7516.44   7946.04     87.04 o
  -1   3   6   2345.08   2449.93     32.46 o
   0   3   6   1440.37   1463.18     23.01 o
   1   3   6   1010.94   1032.88     29.35 o
   2   3   6   8341.92   8160.69     85.04 o
   3   3   6    379.18    448.41     16.23 o
   4   3   6   3460.77   3213.59     41.80 o
   5   3   6    229.02    190.64     15.23 o
   6   3   6   1942.86   1960.72     35.79 o
   7   3   6    128.61     86.70     21.45 o
   8   3   6   2024.65   2054.21     45.13 o
   9   3   6     46.27    177.63     30.79 o
  10   3   6   1220.11   1552.99     61.36 o
 -10   4   6   4425.41   4443.33    116.49 o
  -9   4   6     36.54    215.98     51.47 o
  -8   4   6   7950.03   8025.08    143.28 o
  -7   4   6     90.26    121.72     37.79 o
  -6   4   6  11071.90  11006.60    160.85 o
  -5   4   6    118.85     60.80     24.12 <
  -4   4   6  21397.20  21930.00    249.66 o
  -3   4   6    169.29    189.86     16.23 o
  -2   4   6  27288.50  28890.40    280.79 o
  -1   4   6    171.75    246.66     13.56 o
   0   4   6  34535.30  35882.70    342.03 o
   1   4   6     88.81    110.16     11.67 o
   2   4   6  33419.40  32418.10    297.24 o
   3   4   6    145.83    114.60     12.56 o
   4   4   6  23401.80  22577.00    215.31 o
   5   4   6    152.52    125.94     16.12 o
   6   4   6  10890.40  10539.80    115.05 o
   7   4   6     47.72     24.01     21.45 <
   8   4   6   6774.54   6727.86     93.93 o
   9   4   6     20.04     42.13     31.01 <
  10   4   6   4415.71   4357.52     94.71 o
 -10   5   6    462.87    291.01     53.69 o
  -9   5   6     45.86     76.92     47.46 <
  -8   5   6   1635.77   1358.69     64.36 o
  -7   5   6    341.93    379.05     39.91 o
  -6   5   6   1019.72    763.10     39.24 o
  -5   5   6    419.38    445.30     28.57 o
  -4   5   6   1634.18   1838.11     35.79 o
  -3   5   6   1328.86   1189.95     28.35 o
  -2   5   6   4186.03   4284.15     49.13 o
  -1   5   6   1691.24   1629.47     27.01 o
   0   5   6   2617.60   2851.54     37.57 o
   1   5   6    906.70    918.72     20.45 o
   2   5   6   4562.23   4485.02     50.58 o
   3   5   6    580.19    311.58     17.12 o
   4   5   6   2217.40   2170.14     34.01 o
   5   5   6    346.12    377.83     22.23 o
   6   5   6   1849.46   1818.11     38.91 o
   7   5   6    341.86    340.59     28.57 o
   8   5   6   2993.07   2978.15     59.03 o
   9   5   6     58.83    239.32     36.79 o
  10   5   6   1001.57   1418.05     61.80 o
 -10   6   6   3286.35   3169.46     91.82 o
  -9   6   6      3.91    166.63     50.13 o
  -8   6   6   5470.50   5400.29    115.94 o
  -7   6   6     88.70     58.02     34.79 <
  -6   6   6  14088.00  14303.30    201.42 o
  -5   6   6    277.52    213.98     26.68 o
  -4   6   6  16277.20  16575.70    187.52 o
  -3   6   6     79.14     84.70     16.45 o
  -2   6   6  15962.40  16711.50    166.74 o
  -1   6   6    142.56    180.19     15.01 o
   0   6   6  33141.40  34391.10    329.58 o
   1   6   6     61.77     75.14     12.89 o
   2   6   6  16589.40  17402.50    164.96 o
   3   6   6    152.37    133.06     13.78 o
   4   6   6  15824.20  15947.40    167.96 o
   5   6   6    627.85    609.48     26.57 o
   6   6   6  15091.10  14652.10    181.85 o
   7   6   6    101.55     68.81     25.01 <
   8   6   6   5590.47   5571.37     84.48 o
   9   6   6      7.53     79.48     35.90 <
  10   6   6   3091.56   3203.03     88.70 o
  -9   7   6    242.21    269.23     60.58 o
  -8   7   6    843.58    432.85     49.80 o
  -7   7   6    494.17    336.48     42.68 o
  -6   7   6   2649.50   2481.05     75.81 o
  -5   7   6   1344.42   1410.04     43.91 o
  -4   7   6   1807.48   1900.14     39.68 o
  -3   7   6    825.92    856.25     29.01 o
  -2   7   6   2827.24   3136.89     44.13 o
  -1   7   6    621.23    604.03     21.79 o
   0   7   6    776.65    952.63     24.79 o
   1   7   6   1364.95   1339.46     29.46 o
   2   7   6   3427.26   3448.69     45.69 o
   3   7   6    466.33    380.27     17.67 o
   4   7   6   2313.80   2264.07     37.13 o
   5   7   6   1166.85   1038.66     36.02 o
   6   7   6   4037.58   3706.69     64.14 o
   7   7   6    918.94    895.71     40.35 o
   8   7   6   1605.58   1721.73     49.58 o
   9   7   6    118.40    268.23     41.91 o
  -9   8   6     43.71     94.71     60.69 <
  -8   8   6   4972.42   4535.26    111.49 o
  -7   8   6    151.14     55.80     39.68 <
  -6   8   6   9735.23   9792.05    155.18 o
  -5   8   6     87.55     83.92     26.68 o
  -4   8   6  11581.10  11784.10    150.06 o
  -3   8   6     13.90     10.56     20.56 <
  -2   8   6  15536.00  15881.30    180.52 o
  -1   8   6    261.48    303.46     20.01 o
   0   8   6  15928.80  16709.00    188.86 o
   1   8   6    462.39    443.86     22.01 o
   2   8   6  15695.40  15979.80    180.97 o
   3   8   6     24.51     40.80     17.34 <
   4   8   6  10223.20  10635.20    120.61 o
   5   8   6    199.21    166.85     24.68 o
   6   8   6   9833.31   9797.50    130.17 o
   7   8   6    343.74    292.79     32.24 o
   8   8   6   4976.41   5068.26     93.37 o
   9   8   6     57.65    122.27     41.91 <
  -9   9   6    569.16    573.80     70.70 o
  -8   9   6    560.28    491.21     56.69 o
  -7   9   6    582.73    499.21     51.47 o
  -6   9   6    873.40    636.72     41.46 o
  -5   9   6    738.11    756.88     39.79 o
  -4   9   6   1940.34   1966.72     46.24 o
  -3   9   6   1396.47   1392.70     39.02 o
  -2   9   6   1116.88   1280.99     34.01 o
  -1   9   6    892.61    847.47     29.35 o
   0   9   6   4551.80   4721.23     71.14 o
   1   9   6   2031.41   1902.70     40.35 o
   2   9   6   1357.33   1447.39     35.24 o
   3   9   6   1225.95   1108.14     31.57 o
   4   9   6   2906.51   2543.86     49.13 o
   5   9   6   1016.09    991.09     39.46 o
   6   9   6   1323.05   1352.13     47.91 o
   7   9   6    654.07    671.17     44.57 o
   8   9   6    798.96    777.78     62.03 o
  -8  10   6   3987.80   3476.37     99.60 o
  -7  10   6    110.88     89.48     46.13 <
  -6  10   6   5529.44   5536.13    103.71 o
  -5  10   6     85.24     83.15     30.90 <
  -4  10   6   8632.81   8731.04    116.16 o
  -3  10   6    550.36    483.32     29.79 o
  -2  10   6  11405.70  11557.70    138.73 o
  -1  10   6     48.54     11.67     19.12 <
   0  10   6  11384.80  11755.50    149.51 o
   1  10   6    108.42     93.82     20.45 o
   2  10   6  11164.30  11190.60    138.50 o
   3  10   6    956.53    833.02     31.35 o
   4  10   6   8643.85   8684.80    117.27 o
   5  10   6    190.23    174.52     28.46 o
   6  10   6   5107.93   5238.23     91.48 o
   7  10   6    249.14    258.89     40.46 o
   8  10   6   3884.55   3697.13     96.49 o
  -7  11   6    828.63    772.33     55.91 o
  -6  11   6    674.68    551.23     44.80 o
  -5  11   6   1125.58   1206.62     49.58 o
  -4  11   6   1487.24   1341.24     42.68 o
  -3  11   6    614.69    639.83     33.46 o
  -2  11   6   1113.52   1227.63     36.57 o
  -1  11   6   2420.43   2216.27     46.58 o
   0  11   6   3504.60   3468.81     58.80 o
   1  11   6   1121.36   1063.90     34.68 o
   2  11   6   1174.10   1308.56     37.90 o
   3  11   6    804.40    713.08     31.68 o
   4  11   6   2323.16   2235.51     52.47 o
   5  11   6   1150.35   1072.90     43.24 o
   6  11   6    972.13    858.70     47.13 o
   7  11   6    640.29    547.79     47.35 o
  -7  12   6    128.51    103.49     49.02 <
  -6  12   6   4677.08   4622.63    100.93 o
  -5  12   6     82.70    107.04     37.02 <
  -4  12   6   5855.62   5838.92     95.60 o
  -3  12   6    189.42    156.62     29.01 o
  -2  12   6   8236.02   7910.03    111.94 o
  -1  12   6    218.68    178.85     26.12 o
   0  12   6   7403.28   7245.08    100.26 o
   1  12   6    446.84    441.85     31.12 o
   2  12   6   7352.89   7433.16    109.49 o
   3  12   6    410.60    376.38     30.24 o
   4  12   6   5536.29   5455.32     92.93 o
   5  12   6    107.42    111.05     33.57 o
   6  12   6   4634.91   4608.07     91.93 o
  -6  13   6    979.00    759.21     53.47 o
  -5  13   6   1076.89   1116.14     57.80 o
  -4  13   6    577.49    442.08     36.13 o
  -3  13   6   1429.46   1538.21     50.13 o
  -2  13   6   1156.03   1161.38     43.80 o
  -1  13   6   1316.60   1221.74     43.91 o
   0  13   6    867.97    953.85     37.57 o
   1  13   6   1002.01   1066.45     41.46 o
   2  13   6   1509.68   1444.28     46.58 o
   3  13   6   1401.19   1388.59     46.24 o
   4  13   6    987.70    865.37     44.57 o
   5  13   6    812.84    660.17     46.69 o
   6  13   6   1341.73   1115.47     58.14 o
  -4  14   6   4597.33   4443.78     94.60 o
  -3  14   6     75.43     53.24     32.24 <
  -2  14   6   4504.38   4358.74     80.15 o
  -1  14   6    327.13    303.24     31.46 o
   0  14   6   5726.84   5420.86     90.04 o
   1  14   6    241.88    194.08     29.79 o
   2  14   6   4461.56   4286.82     78.26 o
   3  14   6    153.62    128.50     37.46 o
   4  14   6   4658.76   4433.44     93.37 o
  -3  15   6   1740.60   1636.70     60.80 o
  -2  15   6    706.71    493.65     41.80 o
  -1  15   6   1600.94   1731.40     56.47 o
   0  15   6    336.10    247.55     36.13 o
   1  15   6   1543.10   1596.46     57.91 o
   2  15   6   1043.33    975.53     48.69 o
   3  15   6   1662.74   1661.37     64.81 o
  -9   0   7   3310.79   3465.14    110.49 o
  -7   0   7   5767.39   6921.83    379.05 o
  -5   0   7  15123.10  15648.80    283.90 o
  -3   0   7   7779.19   8128.12    134.50 o
  -1   0   7  20422.20  20035.50    249.55 o
   1   0   7  24678.10  22893.50    282.90 o
   3   0   7   9721.04   9793.38    146.62 o
   5   0   7  16808.10  16375.60    265.33 o
   7   0   7   9857.00  10009.50    176.85 o
   9   0   7   3124.56   3399.22     93.48 o
 -10   1   7      2.02    203.86     59.25 o
  -9   1   7   1650.40   1582.23     71.14 o
  -8   1   7     38.12    115.83     38.35 o
  -7   1   7   3630.61   3640.66     75.37 o
  -6   1   7    270.60    293.90     35.24 o
  -5   1   7   1720.95   1681.05     43.69 o
  -4   1   7    274.48    299.57     20.79 o
  -3   1   7   5141.96   4903.31     58.14 o
  -2   1   7     27.08     34.35     12.78 <
  -1   1   7   6333.85   5973.87     57.25 o
   0   1   7    675.64    736.53     17.45 o
   1   1   7   6579.39   6154.73     69.36 o
   2   1   7     19.90     67.25     12.01 o
   3   1   7   5736.54   5314.81     63.69 o
   4   1   7    427.73    526.11     21.12 o
   5   1   7   1203.61   1043.55     28.46 o
   6   1   7    329.35    354.15     24.23 o
   7   1   7   3754.84   3520.94     58.25 o
   8   1   7     78.16     44.35     24.68 <
   9   1   7   1228.61   1118.92     43.24 o
  10   1   7      4.51     63.92     37.90 <
 -10   2   7     29.49    107.49     59.14 <
  -9   2   7   3832.16   3983.14    104.15 o
  -8   2   7    170.08    198.86     45.91 o
  -7   2   7   7300.69   7382.91    126.83 o
  -6   2   7     24.58     83.04     32.79 <
  -5   2   7   9309.23   9827.40    132.28 o
  -4   2   7    159.44    103.82     18.90 o
  -3   2   7  14277.60  14566.70    147.95 o
  -2   2   7    273.34    312.69     15.56 o
  -1   2   7  17413.70  16878.90    145.06 o
   0   2   7     63.62    144.51     12.45 o
   1   2   7  16974.40  16697.50    158.51 o
   2   2   7    267.63    249.77     14.56 o
   3   2   7  15410.90  15069.20    162.62 o
   4   2   7    112.46     53.47     14.23 o
   5   2   7  10932.70  10841.50    119.27 o
   6   2   7     15.32     -0.89     18.90 <
   7   2   7   8935.83   8677.13    108.60 o
   8   2   7     84.96     83.48     25.68 o
   9   2   7   5311.63   5449.76     85.81 o
  10   2   7     31.41    369.93     43.46 o
 -10   3   7     86.81    463.31     70.92 o
  -9   3   7   1688.50   1889.02     76.92 o
  -8   3   7     88.65    160.85     43.57 o
  -7   3   7   2363.90   2359.45     69.59 o
  -6   3   7    164.93    212.54     40.57 o
  -5   3   7   4985.61   4591.62     73.92 o
  -4   3   7    404.71    284.68     20.12 o
  -3   3   7   4458.00   4231.69     54.25 o
  -2   3   7    464.81    567.69     18.34 o
  -1   3   7   7251.21   7131.03     73.36 o
   0   3   7     21.95     -2.56     10.78 <
   1   3   7   8471.38   7930.70     78.59 o
   2   3   7    499.85    469.76     16.34 o
   3   3   7   3732.62   3526.83     44.80 o
   4   3   7    917.86    983.31     24.23 o
   5   3   7   4167.99   4103.19     54.13 o
   6   3   7    112.07    135.28     21.01 o
   7   3   7   1556.45   1451.06     37.02 o
   8   3   7    198.75    243.10     27.90 o
   9   3   7   1476.05   1500.75     45.91 o
  10   3   7     41.15      9.45     37.02 <
 -10   4   7     15.53     -0.44     57.69 <
  -9   4   7   3689.80   3439.46    106.82 o
  -8   4   7     84.47    166.29     45.13 o
  -7   4   7   6647.79   6609.92    123.83 o
  -6   4   7    203.37    175.52     36.02 o
  -5   4   7   9802.45  10171.70    142.73 o
  -4   4   7    312.54    340.92     22.57 o
  -3   4   7  16110.70  16072.90    163.07 o
  -2   4   7    222.29    290.35     16.23 o
  -1   4   7  16699.10  16308.00    158.51 o
   0   4   7    424.41    401.73     15.56 o
   1   4   7  13543.30  14121.30    139.06 o
   2   4   7    107.56    127.83     12.34 o
   3   4   7  13773.90  14313.60    143.95 o
   4   4   7    599.79    612.26     21.45 o
   5   4   7  12223.50  11884.40    130.95 o
   6   4   7    385.89    399.39     24.01 o
   7   4   7   7897.10   7530.87     94.93 o
   8   4   7     39.70     88.59     25.34 o
   9   4   7   5362.88   5227.11     94.04 o
  10   4   7     28.45    376.60     47.24 o
 -10   5   7     90.45    385.50     61.92 o
  -9   5   7   2524.83   2604.11     91.26 o
  -8   5   7     90.31    178.74     53.58 o
  -7   5   7   1901.18   1853.57     66.47 o
  -6   5   7    167.42    203.53     36.57 o
  -5   5   7   4889.34   4909.42     79.03 o
  -4   5   7    360.25    327.03     22.79 o
  -3   5   7   4309.71   4071.06     53.69 o
  -2   5   7    595.07    467.75     18.45 o
  -1   5   7   7257.89   7341.34     78.03 o
   0   5   7   1074.43   1064.34     22.90 o
   1   5   7   6288.17   6502.43     70.03 o
   2   5   7   1336.22   1319.12     25.57 o
   3   5   7   3432.13   3564.40     44.02 o
   4   5   7    631.98    622.38     23.79 o
   5   5   7   3874.33   3998.81     57.36 o
   6   5   7    116.36     64.25     21.68 <
   7   5   7   1567.75   1542.10     40.35 o
   8   5   7     55.93     43.57     26.90 <
   9   5   7   1856.02   1724.07     55.02 o
  10   5   7     69.43     74.36     42.46 <
  -9   6   7   2715.23   2439.93     84.70 o
  -8   6   7    200.77    177.63     50.24 o
  -7   6   7   5455.17   5073.60    103.71 o
  -6   6   7    570.68    532.23     44.24 o
  -5   6   7   7120.58   7011.31    103.38 o
  -4   6   7    504.42    381.72     25.23 o
  -3   6   7  12540.70  12823.30    134.28 o
  -2   6   7    285.24    226.87     17.79 o
  -1   6   7  14282.20  15335.10    154.62 o
   0   6   7     28.57     25.79     12.89 <
   1   6   7  15215.10  16114.60    158.18 o
   2   6   7    249.53    229.54     15.90 o
   3   6   7  13298.20  13339.10    140.06 o
   4   6   7    914.19    895.83     29.23 o
   5   6   7   8188.14   7914.47     96.60 o
   6   6   7    459.78    386.16     28.68 o
   7   6   7   6228.63   6102.26     91.26 o
   8   6   7     96.72    122.16     30.46 o
   9   6   7   3527.07   3551.84     77.81 o
  -9   7   7   1565.29   1507.75     87.15 o
  -8   7   7    262.52    327.36     59.47 o
  -7   7   7   2398.08   2263.85     72.48 o
  -6   7   7    199.45    164.07     38.68 o
  -5   7   7   4668.27   4619.18     79.81 o
  -4   7   7    870.49    807.68     31.57 o
  -3   7   7   4055.51   4128.09     59.58 o
  -2   7   7    845.56    758.66     25.01 o
  -1   7   7   3452.98   3625.98     50.80 o
   0   7   7    849.45   1032.55     27.90 o
   1   7   7   3846.34   3752.26     49.91 o
   2   7   7   1497.24   1388.03     29.12 o
   3   7   7   3723.33   3899.32     51.91 o
   4   7   7    529.14    345.92     23.01 o
   5   7   7   4689.88   4591.17     66.58 o
   6   7   7    401.34    383.72     30.46 o
   7   7   7   1626.66   1377.36     42.91 o
   8   7   7    142.24    127.94     32.68 o
   9   7   7   1195.79   1018.66     52.80 o
  -9   8   7   2597.77   2328.77     98.04 o
  -8   8   7    549.75    414.07     62.36 o
  -7   8   7   3752.89   3345.20     86.93 o
  -6   8   7     51.24     18.90     36.35 <
  -5   8   7   5674.66   5724.88     93.71 o
  -4   8   7   1959.35   1864.01     42.91 o
  -3   8   7   9222.67   9462.80    117.38 o
  -2   8   7    616.67    754.65     27.90 o
  -1   8   7   9930.52  10024.90    117.27 o
   0   8   7    294.61    306.58     21.68 o
   1   8   7  10342.80  10580.70    126.28 o
   2   8   7    551.13    557.13     24.23 o
   3   8   7   9671.11   9881.75    113.16 o
   4   8   7    856.26    386.50     33.13 o
   5   8   7   6511.51   6618.70     98.60 o
   6   8   7     36.92     26.34     28.68 <
   7   8   7   4311.57   4053.28     74.48 o
   8   8   7    423.82    285.12     39.46 o
   9   8   7   3032.50   3109.77     83.70 o
  -8   9   7    231.14    249.88     56.13 o
  -7   9   7   2336.54   2063.88     72.92 o
  -6   9   7    583.56    616.59     43.91 o
  -5   9   7   1376.40   1387.37     50.13 o
  -4   9   7    774.29    700.30     33.13 o
  -3   9   7   4428.62   4569.16     66.47 o
  -2   9   7    951.70   1044.22     33.68 o
  -1   9   7   3366.03   3292.95     52.24 o
   0   9   7    347.80    471.87     26.23 o
   1   9   7   2721.38   2816.86     50.69 o
   2   9   7    814.18    778.66     29.90 o
   3   9   7   4360.89   4620.19     66.14 o
   4   9   7    421.31    263.22     26.68 o
   5   9   7   1481.82   1429.16     44.91 o
   6   9   7    866.01    832.35     43.80 o
   7   9   7   2105.81   2099.78     70.59 o
   8   9   7    196.55     93.04     45.24 <
  -8  10   7    264.90    360.49     60.14 o
  -7  10   7   2466.59   2354.89     73.14 o
  -6  10   7    733.39    741.76     48.80 o
  -5  10   7   5117.27   4842.72     87.04 o
  -4  10   7   1100.84   1084.68     38.68 o
  -3  10   7   6865.83   7201.06     99.60 o
  -2  10   7    581.74    708.19     31.35 o
  -1  10   7   5275.21   5193.87     72.14 o
   0  10   7    419.07    499.99     28.23 o
   1  10   7   5169.92   4997.90     74.25 o
   2  10   7    449.05    504.21     27.90 o
   3  10   7   7988.93   7996.95    106.71 o
   4  10   7    747.72    591.47     31.68 o
   5  10   7   5349.10   5022.91     81.03 o
   6  10   7    420.73    344.04     36.79 o
   7  10   7   3006.79   2837.21     76.37 o
   8  10   7    119.20    149.40     53.47 <
  -7  11   7   1255.53   1188.84     67.25 o
  -6  11   7    507.70    555.01     50.69 o
  -5  11   7   1331.37   1350.68     51.58 o
  -4  11   7    600.41    499.10     32.79 o
  -3  11   7   2951.43   3142.67     59.25 o
  -2  11   7    721.70    818.01     34.01 o
  -1  11   7   2659.03   2772.84     50.02 o
   0  11   7    678.44    772.66     31.57 o
   1  11   7   2532.45   2595.66     51.02 o
   2  11   7    558.99    493.10     28.90 o
   3  11   7   3183.47   3253.49     61.03 o
   4  11   7   1125.81   1084.46     42.80 o
   5  11   7   1071.04    995.87     41.24 o
   6  11   7    271.14    184.63     39.13 o
   7  11   7   1201.84   1219.74     61.69 o
  -6  12   7    850.58    819.57     59.25 o
  -5  12   7   3275.00   3065.19     80.03 o
  -4  12   7    282.02    336.03     34.35 o
  -3  12   7   3267.18   3368.99     67.70 o
  -2  12   7    567.42    639.60     35.46 o
  -1  12   7   4965.96   5106.73     79.14 o
   0  12   7    839.21    911.16     36.13 o
   1  12   7   5915.14   5687.19     87.82 o
   2  12   7    513.42    527.11     32.46 o
   3  12   7   4415.91   4044.94     76.92 o
   4  12   7    317.27    290.57     35.68 o
   5  12   7   3501.23   3366.87     79.14 o
   6  12   7    559.30    416.73     45.80 o
  -5  13   7   1655.32   1552.10     65.58 o
  -4  13   7    568.85    458.64     43.80 o
  -3  13   7   1406.03   1392.15     51.80 o
  -2  13   7    616.48    558.35     35.79 o
  -1  13   7   2019.05   2151.25     54.80 o
   0  13   7   1151.25   1228.08     41.91 o
   1  13   7   1862.27   1958.50     51.69 o
   2  13   7    605.33    594.59     35.13 o
   3  13   7   1138.93   1034.66     46.58 o
   4  13   7    899.66    790.78     47.24 o
   5  13   7   1780.43   1575.67     61.58 o
  -4  14   7    593.38    531.34     48.69 o
  -3  14   7   2966.77   2831.98     68.03 o
  -2  14   7    604.97    607.48     39.79 o
  -1  14   7   3502.57   3433.79     70.03 o
   0  14   7    508.17    560.35     35.46 o
   1  14   7   3908.22   3645.55     69.59 o
   2  14   7    754.40    724.53     40.46 o
   3  14   7   3280.45   2964.15     74.14 o
   4  14   7    337.39    304.57     42.24 o
  -2  15   7    869.07    829.35     48.69 o
  -1  15   7   1324.48   1263.09     51.91 o
   0  15   7   1304.69   1284.43     49.80 o
   1  15   7   1164.78   1178.17     48.91 o
 -10   0   8     92.93     41.57     80.48 <
  -8   0   8    279.14     52.02     55.58 <
  -6   0   8     31.03     -7.67     46.69 <
  -4   0   8     85.00     87.04     31.57 <
  -2   0   8   2453.88   2295.75     44.46 o
   0   0   8    183.92    263.56     18.12 o
   2   0   8   2191.53   2202.82     48.69 o
   4   0   8    126.06     95.82     22.12 o
   6   0   8     54.67      7.45     30.12 <
   8   0   8    419.91    369.49     43.69 o
  10   0   8    189.76    165.29     57.14 <
 -10   1   8   3323.85   3425.57    108.16 o
  -9   1   8     25.79     12.56     44.69 <
  -8   1   8   6163.44   6098.92    114.05 o
  -7   1   8     50.09     14.23     38.24 <
  -6   1   8   7866.13   7923.92    126.39 o
  -5   1   8    186.57    110.60     26.90 o
  -4   1   8  12108.20  11945.10    150.84 o
  -3   1   8     19.34      8.11     14.90 <
  -2   1   8  16308.30  15111.80    139.95 o
  -1   1   8    326.98    347.93     14.12 o
   0   1   8  10537.50   9538.50     89.59 o
   1   1   8    426.57    453.64     16.12 o
   2   1   8  15795.60  14411.00    141.84 o
   3   1   8     40.69     17.67     13.67 <
   4   1   8  12445.60  12265.70    136.17 o
   5   1   8    251.29    208.42     21.01 o
   6   1   8   8202.74   7966.27     99.93 o
   7   1   8     82.41     58.14     24.23 <
   8   1   8   6781.52   6546.45     92.48 o
   9   1   8     14.71      6.11     28.79 <
  10   1   8   3081.79   3336.53     81.03 o
 -10   2   8     76.68     37.90     59.58 <
  -9   2   8     40.25    125.39     51.91 <
  -8   2   8     80.85     73.70     42.80 <
  -7   2   8    108.09    104.82     39.46 <
  -6   2   8     57.84     -3.78     34.01 <
  -5   2   8     50.37     78.70     28.57 <
  -4   2   8     85.89     44.13     20.01 <
  -3   2   8   1283.02   1408.82     29.12 o
  -2   2   8    142.02    133.39     14.45 o
  -1   2   8     81.13    157.62     12.67 o
   0   2   8    835.72    938.29     20.56 o
   1   2   8    149.75    201.86     13.56 o
   2   2   8     61.07     24.90     12.89 <
   3   2   8   1934.50   1765.64     31.35 o
   4   2   8    192.19    225.99     19.12 o
   5   2   8     94.65     99.15     19.34 o
   6   2   8    126.05    128.05     22.57 o
   7   2   8    199.08    179.74     25.34 o
   8   2   8     37.75     41.13     25.79 <
   9   2   8     66.46    131.39     32.35 o
  10   2   8     84.45     45.46     38.68 <
 -10   3   8   3680.83   3642.77    100.60 o
  -9   3   8     22.30    -54.36     50.24 <
  -8   3   8   5794.77   5953.97    119.27 o
  -7   3   8      0.26      2.67     37.90 <
  -6   3   8   8265.08   7810.43    125.72 o
  -5   3   8     63.50     -6.22     27.68 <
  -4   3   8  11453.40  11523.20    136.61 o
  -3   3   8    534.31    462.08     21.68 o
  -2   3   8  15349.10  14454.10    140.73 o
  -1   3   8    325.82    317.02     14.34 o
   0   3   8  12621.80  11744.10    110.60 o
   1   3   8    149.33     62.69     12.67 o
   2   3   8  11810.50  12143.90    121.61 o
   3   3   8    237.69    132.06     15.90 o
   4   3   8  12254.00  12051.00    131.72 o
   5   3   8    103.26     85.48     19.01 o
   6   3   8   8454.71   8068.21    101.26 o
   7   3   8      0.26    -28.68     22.23 <
   8   3   8   5354.24   5177.64     76.70 o
   9   3   8     41.29     69.14     31.57 <
  10   3   8   4207.68   4564.83     97.49 o
 -10   4   8     84.61    142.17     62.36 <
  -9   4   8     88.79    184.19     53.80 o
  -8   4   8     19.66     -2.45     45.13 <
  -7   4   8    199.01    281.79     46.02 o
  -6   4   8    149.27    172.63     37.13 o
  -5   4   8    116.77    134.84     28.79 o
  -4   4   8    134.36    137.61     21.45 o
  -3   4   8    430.50    294.79     19.12 o
  -2   4   8    809.96    831.46     22.12 o
  -1   4   8    286.42    300.24     16.23 o
   0   4   8     23.23     53.58     12.78 o
   1   4   8    568.57    586.36     18.90 o
   2   4   8    883.12   1057.45     23.12 o
   3   4   8    908.09    899.83     24.57 o
   4   4   8    123.23    148.06     19.01 o
   5   4   8    252.52    288.57     22.12 o
   6   4   8    120.56     92.04     22.45 o
   7   4   8    105.96    116.61     23.90 o
   8   4   8     38.83     22.23     25.46 <
   9   4   8    164.13    300.35     37.13 o
  -9   5   8     27.65     -4.00     57.02 <
  -8   5   8   4721.22   4827.05    106.16 o
  -7   5   8     18.02    -25.23     41.57 <
  -6   5   8   8227.00   8367.11    139.84 o
  -5   5   8     20.13    -16.90     27.23 <
  -4   5   8  11940.90  11531.00    130.50 o
  -3   5   8     13.64    -23.57     16.34 <
  -2   5   8   9146.14   8928.01    101.49 o
  -1   5   8     12.25    -21.34     13.89 <
   0   5   8  17964.20  17634.90    171.74 o
   1   5   8     24.65    -19.12     12.56 <
   2   5   8   9285.06   9170.12     95.71 o
   3   5   8     16.89     -7.11     15.23 <
   4   5   8  10216.00  10084.40    116.83 o
   5   5   8     13.73     -8.34     19.45 <
   6   5   8   7997.44   7793.64     97.60 o
   7   5   8     27.45     10.00     24.23 <
   8   5   8   4752.50   4876.74     74.36 o
   9   5   8     55.29    165.85     35.90 o
  -9   6   8    122.12    261.00     62.36 o
  -8   6   8     60.14     23.01     50.35 <
  -7   6   8    316.48    293.68     50.24 o
  -6   6   8     54.60    -30.57     36.79 <
  -5   6   8    538.97    665.73     38.24 o
  -4   6   8     49.05     28.79     23.12 <
  -3   6   8    379.20    435.85     25.57 o
  -2   6   8    250.07    263.33     21.34 o
  -1   6   8    827.00    911.72     26.23 o
   0   6   8    250.27    294.46     19.79 o
   1   6   8   1084.16   1143.26     27.12 o
   2   6   8    308.85    341.37     18.34 o
   3   6   8    276.14    239.21     19.34 o
   4   6   8     61.54     18.01     20.12 <
   5   6   8    355.16    252.77     24.34 o
   6   6   8    120.22     69.59     24.01 <
   7   6   8    609.31    615.82     35.68 o
   8   6   8     62.74     35.13     31.46 <
   9   6   8    118.46    228.65     42.57 o
  -9   7   8     35.07     52.69     62.36 <
  -8   7   8   3464.45   3363.65    105.60 o
  -7   7   8     20.63     12.12     47.58 <
  -6   7   8   7970.51   7952.93    140.84 o
  -5   7   8     27.35    -11.00     30.35 <
  -4   7   8   8185.70   8172.47    105.82 o
  -3   7   8     99.42     48.80     21.12 <
  -2   7   8   9774.70   9575.73    110.60 o
  -1   7   8    299.65    236.32     20.23 o
   0   7   8  15137.60  14769.80    159.51 o
   1   7   8    523.78    446.19     23.90 o
   2   7   8   9264.66   9297.95    106.82 o
   3   7   8    218.59    157.96     20.90 o
   4   7   8   6796.27   6791.77     88.82 o
   5   7   8     16.20    -23.79     21.90 <
   6   7   8   8563.13   8345.99    114.05 o
   7   7   8     18.55    -41.68     26.46 <
   8   7   8   4050.08   4208.34     81.03 o
   9   7   8     46.75     85.70     41.91 <
  -8   8   8     34.04     23.23     57.80 <
  -7   8   8    465.62    551.79     53.47 o
  -6   8   8     49.50    -23.23     34.46 <
  -5   8   8    792.66    830.02     42.35 o
  -4   8   8      1.37    -19.12     24.01 <
  -3   8   8   1320.22   1374.92     38.91 o
  -2   8   8     32.80      1.67     21.34 <
  -1   8   8   1038.03    894.27     30.01 o
   0   8   8     21.59     67.03     20.12 o
   1   8   8   2284.71   2133.68     42.46 o
   2   8   8     41.41     48.24     20.79 <
   3   8   8    909.84    779.11     30.46 o
   4   8   8      2.57      3.33     23.90 <
   5   8   8    682.08    594.47     34.13 o
   6   8   8     95.67     54.25     31.35 <
   7   8   8    445.52    420.18     42.02 o
   8   8   8     36.00     50.13     41.46 <
  -8   9   8   3919.02   3358.20    108.71 o
  -7   9   8     14.88    -39.02     42.24 <
  -6   9   8   4828.69   4904.75     97.82 o
  -5   9   8     85.06     71.36     32.24 <
  -4   9   8   6662.12   6936.50     94.93 o
  -3   9   8     10.06     -7.45     22.79 <
  -2   9   8   8966.59   9344.53    117.49 o
  -1   9   8     73.54     75.48     21.68 o
   0   9   8   7743.18   8142.68    103.82 o
   1   9   8     93.97    100.15     22.34 o
   2   9   8  10845.40  10526.40    132.50 o
   3   9   8     17.15     12.45     22.68 <
   4   9   8   7223.89   7085.90    104.60 o
   5   9   8     88.08     92.71     28.79 o
   6   9   8   4809.12   4687.99     87.93 o
   7   9   8      6.47      2.00     38.13 <
   8   9   8   4068.72   3956.35    111.71 o
  -7  10   8    661.64    616.82     54.25 o
  -6  10   8     36.96     -6.78     41.13 <
  -5  10   8    807.75    823.13     44.35 o
  -4  10   8     42.08     28.57     26.57 <
  -3  10   8   1153.16   1191.40     39.24 o
  -2  10   8    158.33    149.06     25.57 o
  -1  10   8   1899.06   1963.50     42.57 o
   0  10   8    809.93    855.36     32.57 o
   1  10   8   1606.08   1754.30     43.46 o
   2  10   8    176.79    147.73     24.01 o
   3  10   8   1022.50    904.61     37.02 o
   4  10   8     86.57     39.13     26.79 <
   5  10   8    917.97    825.68     38.35 o
   6  10   8     18.35    -39.02     33.46 <
   7  10   8    573.97    446.63     47.35 o
  -7  11   8     42.71     29.68     46.91 <
  -6  11   8   4053.24   3889.65     93.71 o
  -5  11   8     18.47    -27.46     35.46 <
  -4  11   8   4884.35   4871.29     88.82 o
  -3  11   8     18.41     27.68     26.46 <
  -2  11   8   6236.06   6316.91     89.48 o
  -1  11   8     95.16    119.38     25.79 o
   0  11   8   5652.82   5724.43     82.48 o
   1  11   8     46.46     23.79     22.34 <
   2  11   8   6801.68   6730.64     95.71 o
   3  11   8     23.99    -40.24     26.34 <
   4  11   8   6106.53   5681.75     95.37 o
   5  11   8     36.77     22.68     30.24 <
   6  11   8   4256.59   3963.79     90.71 o
  -6  12   8     36.50    -15.34     46.13 <
  -5  12   8    946.97    904.27     55.91 o
  -4  12   8     41.34    -43.13     36.35 <
  -3  12   8    936.71    953.74     41.02 o
  -2  12   8     23.33     16.90     26.23 <
  -1  12   8   2494.19   2341.77     54.69 o
   0  12   8      1.27    -13.89     24.34 <
   1  12   8   1452.40   1628.02     45.35 o
   2  12   8     21.53     -0.67     25.57 <
   3  12   8   1309.58   1261.31     49.91 o
   4  12   8     29.88     59.47     34.13 <
   5  12   8    987.53    831.80     47.58 o
   6  12   8     68.14     25.79     41.46 <
  -5  13   8      6.30    -33.57     42.57 <
  -4  13   8   3564.71   3307.96     81.59 o
  -3  13   8     49.46     32.46     33.13 <
  -2  13   8   4116.43   4004.81     73.81 o
  -1  13   8     34.13     36.35     30.35 <
   0  13   8   5017.60   5055.70     81.81 o
   1  13   8     67.82    132.83     29.46 o
   2  13   8   4958.50   4577.17     82.15 o
   3  13   8     23.04    -11.12     33.35 <
   4  13   8   3623.34   3285.17     78.48 o
  -3  14   8   1272.41   1246.08     51.69 o
  -2  14   8     15.77    -27.01     31.79 <
  -1  14   8   1052.37   1095.47     45.46 o
   0  14   8      0.28     -1.33     29.01 <
   1  14   8   1142.87   1104.14     46.69 o
   2  14   8     22.59    -17.56     31.79 <
   3  14   8   1440.49   1344.02     57.69 o
  -9   0   9   3015.31   2992.27    121.39 o
  -7   0   9   8066.90   7519.53    196.08 o
  -5   0   9   6248.31   6325.80    137.84 o
  -3   0   9  15067.70  14399.50    215.54 o
  -1   0   9  12830.10  12020.30    146.95 o
   1   0   9  10588.00  10143.20    146.95 o
   3   0   9  14921.20  15102.20    221.21 o
   5   0   9   5390.43   5302.03     99.82 o
   7   0   9   9064.86   8378.67    156.07 o
   9   0   9   2780.16   2558.98     85.04 o
 -10   1   9     42.40    -60.25     58.69 <
  -9   1   9    703.10    594.47     57.47 o
  -8   1   9      3.29    -44.35     42.02 <
  -7   1   9   2016.17   1611.24     63.36 o
  -6   1   9    121.03    218.43     38.35 o
  -5   1   9   4669.31   4626.52     78.48 o
  -4   1   9     35.12     57.69     23.23 <
  -3   1   9   2910.78   2791.63     42.68 o
  -2   1   9    301.71    275.67     15.12 o
  -1   1   9   4547.28   4437.89     46.24 o
   0   1   9     11.95     45.02     12.23 o
   1   1   9   5345.85   5186.76     57.36 o
   2   1   9    250.88    272.89     17.01 o
   3   1   9   3435.56   3312.07     45.35 o
   4   1   9     78.81     77.14     17.34 o
   5   1   9   4093.38   3499.04     53.58 o
   6   1   9     89.34     20.90     22.34 <
   7   1   9   2859.50   2636.90     51.69 o
   8   1   9      4.16     69.81     27.12 <
   9   1   9    726.26    823.68     43.46 o
 -10   2   9     36.12    130.39     62.25 <
  -9   2   9   2534.57   2428.36     76.92 o
  -8   2   9    130.34     90.48     43.91 <
  -7   2   9   5242.25   5340.27    103.93 o
  -6   2   9    101.92    125.39     36.79 o
  -5   2   9   8618.88   8388.45    126.05 o
  -4   2   9    174.60    126.50     25.79 o
  -3   2   9  11273.40  10980.90    120.61 o
  -2   2   9    327.30    320.02     16.23 o
  -1   2   9   9979.49   9499.81     87.70 o
   0   2   9     52.78     18.34     12.56 <
   1   2   9  10789.80  10323.60    104.15 o
   2   2   9    477.80    473.09     20.79 o
   3   2   9  10687.80  10629.10    114.94 o
   4   2   9    239.30    290.01     20.90 o
   5   2   9   8393.12   8010.29     95.15 o
   6   2   9    147.65    129.39     23.45 o
   7   2   9   5023.77   4867.85     72.25 o
   8   2   9    235.25    262.22     29.90 o
   9   2   9   2421.64   2249.96     60.36 o
  -9   3   9    939.01    640.16     58.58 o
  -8   3   9    158.02    200.86     46.35 o
  -7   3   9   1966.61   1995.29     65.25 o
  -6   3   9    233.61    292.46     40.13 o
  -5   3   9   2112.22   2163.81     52.58 o
  -4   3   9     13.96     76.70     23.68 o
  -3   3   9   4303.77   4147.98     54.80 o
  -2   3   9    315.75    376.16     19.56 o
  -1   3   9   4286.75   3966.91     44.69 o
   0   3   9    773.31    868.48     21.56 o
   1   3   9   3664.20   3504.60     45.24 o
   2   3   9    172.71    135.39     14.45 o
   3   3   9   4186.85   4037.05     55.13 o
   4   3   9     27.97     94.26     19.12 o
   5   3   9   2387.52   2395.46     42.68 o
   6   3   9    130.21    101.15     22.68 o
   7   3   9   1658.32   1575.45     42.13 o
   8   3   9     77.34     94.60     27.46 o
   9   3   9   1450.27   1582.78     53.02 o
  -9   4   9   3230.99   3256.72     96.15 o
  -8   4   9    128.14    157.62     48.80 o
  -7   4   9   2997.41   3027.73     76.25 o
  -6   4   9     45.14     59.80     36.24 <
  -5   4   9   6217.42   6237.65     96.93 o
  -4   4   9     45.70     -4.34     23.12 <
  -3   4   9   6476.69   6450.63     76.48 o
  -2   4   9     99.37    112.94     16.67 o
  -1   4   9  10006.00   9753.81    104.15 o
   0   4   9    159.55    163.29     15.67 o
   1   4   9   9267.13   9040.95     95.15 o
   2   4   9     78.24     33.46     14.67 <
   3   4   9   6192.27   6137.94     77.48 o
   4   4   9    102.64     92.26     20.68 o
   5   4   9   6385.80   6078.92     79.81 o
   6   4   9     79.17     58.36     23.79 <
   7   4   9   2889.37   2899.34     52.36 o
   8   4   9    256.35    237.88     29.46 o
   9   4   9   3244.51   3122.77     71.59 o
  -9   5   9    873.83    774.55     71.59 o
  -8   5   9    269.54    421.62     57.14 o
  -7   5   9   1227.11   1093.02     63.03 o
  -6   5   9    594.64    704.97     46.58 o
  -5   5   9   1943.02   1921.04     48.80 o
  -4   5   9    157.24    167.29     25.79 o
  -3   5   9   3267.07   3207.58     48.47 o
  -2   5   9    232.03    298.13     21.79 o
  -1   5   9   3162.70   2998.38     44.35 o
   0   5   9    250.41    346.04     19.23 o
   1   5   9   3124.48   2921.57     41.02 o
   2   5   9    101.65    120.05     16.90 o
   3   5   9   3299.68   3090.54     47.13 o
   4   5   9    346.06    425.74     25.23 o
   5   5   9   2670.85   2551.75     46.46 o
   6   5   9    391.94    286.45     26.23 o
   7   5   9   1307.43   1491.41     43.02 o
   8   5   9    128.50    122.83     30.68 o
   9   5   9   1112.15   1179.61     51.13 o
  -9   6   9   2619.25   2343.33    101.15 o
  -8   6   9     96.78     65.25     54.80 <
  -7   6   9   2833.10   2587.88     86.37 o
  -6   6   9     43.06     44.24     41.13 <
  -5   6   9   6523.77   6697.18    102.27 o
  -4   6   9     29.63     31.46     26.01 <
  -3   6   9   4267.38   4321.84     63.47 o
  -2   6   9     65.32     81.37     20.68 o
  -1   6   9   6410.69   6150.72     76.70 o
   0   6   9    114.81     86.81     19.12 o
   1   6   9   6587.88   6431.95     81.70 o
   2   6   9    101.14    111.94     18.90 o
   3   6   9   3684.62   3783.50     54.69 o
   4   6   9     35.25    -14.90     20.56 <
   5   6   9   5970.92   5886.72     83.26 o
   6   6   9     71.65     47.13     25.12 <
   7   6   9   3093.34   2900.45     57.02 o
   8   6   9     93.52     79.37     33.35 <
   9   6   9   2630.69   2589.77     71.36 o
  -8   7   9    262.46    343.48     61.58 o
  -7   7   9   1245.76   1000.09     66.25 o
  -6   7   9     97.74    170.41     40.35 o
  -5   7   9   1174.84    994.65     41.68 o
  -4   7   9    311.33    375.38     29.68 o
  -3   7   9   2360.45   2257.18     44.69 o
  -2   7   9    247.21    281.79     24.57 o
  -1   7   9   2570.29   2534.08     45.02 o
   0   7   9    406.73    512.44     26.01 o
   1   7   9   3475.14   3221.59     52.69 o
   2   7   9    396.24    429.29     25.46 o
   3   7   9   3075.18   2867.11     51.58 o
   4   7   9    190.42    211.42     24.34 o
   5   7   9   1563.74   1682.27     43.91 o
   6   7   9     79.55     53.91     27.57 <
   7   7   9   1498.04   1476.85     48.69 o
   8   7   9    255.64    188.75     37.68 o
  -8   8   9      9.83     55.36     61.47 <
  -7   8   9   3622.39   3399.67     93.48 o
  -6   8   9    208.68    187.63     39.02 o
  -5   8   9   3809.97   3655.55     70.36 o
  -4   8   9    170.82    153.84     28.23 o
  -3   8   9   5098.50   5113.62     78.37 o
  -2   8   9    222.01    168.63     26.01 o
  -1   8   9   4753.36   4574.50     68.70 o
   0   8   9     72.72     85.04     22.34 o
   1   8   9   4469.35   4368.30     67.70 o
   2   8   9    238.71    199.31     25.34 o
   3   8   9   4568.07   4594.51     76.14 o
   4   8   9    105.84     75.03     26.68 <
   5   8   9   3917.22   3620.87     70.03 o
   6   8   9    353.18    362.82     35.90 o
   7   8   9   2993.64   2709.60     73.59 o
   8   8   9      9.40    -10.89     44.69 <
  -7   9   9    728.39    604.48     58.14 o
  -6   9   9     23.54     28.01     38.68 <
  -5   9   9   1417.75   1126.15     50.91 o
  -4   9   9    646.74    657.61     36.35 o
  -3   9   9   2775.89   2901.45     54.80 o
  -2   9   9    564.70    580.58     31.12 o
  -1   9   9   2120.99   1902.47     44.13 o
   0   9   9    523.66    558.02     29.12 o
   1   9   9   1599.85   1613.91     42.02 o
   2   9   9    740.51    762.32     33.24 o
   3   9   9   2877.01   2944.70     59.03 o
   4   9   9    473.60    382.05     31.57 o
   5   9   9   1970.04   1710.95     51.36 o
   6   9   9     39.12     36.68     32.57 <
   7   9   9   1134.17   1091.57     57.36 o
  -7  10   9   2834.69   2355.33     85.15 o
  -6  10   9     21.79     -6.11     43.46 <
  -5  10   9   1988.08   1990.29     63.36 o
  -4  10   9     56.70     46.58     32.24 <
  -3  10   9   4649.82   4838.72     75.03 o
  -2  10   9    302.19    291.90     29.01 o
  -1  10   9   5008.45   4880.52     74.14 o
   0  10   9    238.13    276.67     25.34 o
   1  10   9   4487.19   4509.36     72.36 o
   2  10   9    267.09    199.64     26.01 o
   3  10   9   5054.41   5150.08     88.59 o
   4  10   9    120.58    105.16     29.90 o
   5  10   9   1742.90   1602.46     53.58 o
   6  10   9     34.56      1.11     36.13 <
   7  10   9   2559.89   2158.69     72.81 o
  -6  11   9    774.73    842.36     59.14 o
  -5  11   9   1266.67   1104.58     54.47 o
  -4  11   9    409.29    476.09     42.91 o
  -3  11   9   1594.15   1587.56     46.13 o
  -2  11   9    589.05    569.69     33.57 o
  -1  11   9   2095.24   2095.56     48.80 o
   0  11   9    970.11    975.86     35.57 o
   1  11   9   1840.15   1828.89     49.24 o
   2  11   9    706.58    736.65     36.68 o
   3  11   9   1777.23   1733.40     52.47 o
   4  11   9    515.71    489.43     41.02 o
   5  11   9   1272.80   1056.67     47.91 o
   6  11   9    675.90    634.05     49.69 o
  -5  12   9   2448.66   2389.79     73.03 o
  -4  12   9    250.04    150.73     41.02 o
  -3  12   9   2968.09   2946.14     61.36 o
  -2  12   9    128.07    135.61     31.01 o
  -1  12   9   3398.37   3545.40     66.03 o
   0  12   9    252.95    205.98     28.35 o
   1  12   9   3560.41   3652.11     71.59 o
   2  12   9    161.49     89.93     31.35 <
   3  12   9   3146.98   2962.15     73.25 o
   4  12   9    544.91    467.98     43.91 o
   5  12   9   2394.20   2389.46     72.48 o
  -4  13   9    654.12    693.29     55.02 o
  -3  13   9   1040.53    908.16     45.24 o
  -2  13   9    909.46    970.86     45.35 o
  -1  13   9   1566.33   1564.89     53.36 o
   0  13   9    856.59    779.89     41.13 o
   1  13   9   1621.58   1703.28     53.80 o
   2  13   9    917.83    954.07     48.24 o
   3  13   9    896.29    892.93     50.47 o
   4  13   9    562.12    486.76     46.24 o
  -2  14   9    121.60    122.27     36.57 o
  -1  14   9   2553.20   2393.46     62.25 o
   0  14   9    270.49    194.97     35.68 o
   1  14   9   2384.80   2310.54     62.36 o
   2  14   9    148.04    102.71     36.79 <
  -8   0  10   3956.24   3475.25    125.61 o
  -6   0  10   6001.62   5564.59    142.28 o
  -4   0  10  10210.00  10062.90    170.74 o
  -2   0  10  14420.30  13810.00    189.97 o
   0   0  10  11745.20  12245.50    155.62 o
   2   0  10  18054.20  16999.60    237.32 o
   4   0  10  10797.10  10361.10    154.62 o
   6   0  10   6376.34   6412.17    119.72 o
   8   0  10   5105.71   5084.16    113.38 o
  -9   1  10      5.33     82.15     51.24 <
  -8   1  10   1291.54   1311.22     67.25 o
  -7   1  10     82.31    178.19     42.91 o
  -6   1  10   2094.05   2113.79     59.36 o
  -5   1  10    125.36    252.44     34.57 o
  -4   1  10   1308.75   1255.31     37.02 o
  -3   1  10     46.91    142.62     22.01 o
  -2   1  10   1770.48   1706.06     29.35 o
  -1   1  10    260.00    317.80     16.56 o
   0   1  10    193.92    206.53     15.67 o
   1   1  10    256.33    317.69     17.90 o
   2   1  10   1745.53   1753.08     34.01 o
   3   1  10     35.72    103.04     18.12 o
   4   1  10   1247.71   1310.89     31.68 o
   5   1  10     82.86     83.70     21.79 o
   6   1  10   1897.71   1797.65     43.02 o
   7   1  10    185.35    184.86     27.90 o
   8   1  10    784.48    594.25     35.68 o
   9   1  10     11.08     16.23     33.46 <
  -9   2  10     59.89     57.58     52.58 <
  -8   2  10   3782.03   3453.36     85.04 o
  -7   2  10     51.34     48.69     42.02 <
  -6   2  10   6099.28   5605.16    101.82 o
  -5   2  10     71.22     61.69     31.79 <
  -4   2  10   8616.09   8523.62    120.50 o
  -3   2  10    175.78    156.07     21.12 o
  -2   2  10  13773.60  13377.90    134.06 o
  -1   2  10    219.24    241.44     16.45 o
   0   2  10  11037.60  10793.10    106.71 o
   1   2  10    197.45    193.30     17.67 o
   2   2  10  12625.30  12529.70    141.73 o
   3   2  10    104.45     64.47     18.01 o
   4   2  10  11106.30  10900.50    123.05 o
   5   2  10    119.29    116.38     23.12 o
   6   2  10   7049.23   6867.03     91.82 o
   7   2  10    114.72    147.06     27.34 o
   8   2  10   4400.26   4358.07     73.59 o
   9   2  10     41.40    111.60     35.68 o
  -9   3  10     86.42    233.99     52.13 o
  -8   3  10    870.11    864.92     58.02 o
  -7   3  10    124.50    258.11     46.46 o
  -6   3  10   1686.50   1743.52     60.14 o
  -5   3  10    193.36    341.26     36.24 o
  -4   3  10   2628.92   2671.36     49.47 o
  -3   3  10    275.37    355.04     23.34 o
  -2   3  10   1426.51   1427.38     32.68 o
  -1   3  10    478.48    577.36     20.56 o
   0   3  10   3364.73   3001.61     39.46 o
   1   3  10    232.38    262.22     18.23 o
   2   3  10   1034.35   1070.90     28.35 o
   3   3  10    202.36    262.45     21.34 o
   4   3  10   1577.25   1278.32     37.68 o
   5   3  10     87.64     88.04     22.01 o
   6   3  10   1289.21   1187.62     37.02 o
   7   3  10     55.07      2.56     24.45 <
   8   3  10    782.16    669.06     37.68 o
   9   3  10    189.93    122.16     36.90 o
  -9   4  10     44.00    129.50     57.80 <
  -8   4  10   3454.20   3163.68     83.04 o
  -7   4  10    103.39     33.57     43.69 <
  -6   4  10   5390.96   5109.95     92.48 o
  -5   4  10     84.34     97.71     34.13 <
  -4   4  10   8266.33   8205.15    109.05 o
  -3   4  10    137.41    123.28     21.34 o
  -2   4  10   7442.60   7490.29     90.71 o
  -1   4  10    108.64     97.82     17.56 o
   0   4  10  10384.10  10320.90    108.27 o
   1   4  10    248.24    213.76     18.67 o
   2   4  10   8963.72   8994.38     98.93 o
   3   4  10    122.81    108.05     20.34 o
   4   4  10  10062.20   9622.53    117.49 o
   5   4  10    150.17    159.18     24.90 o
   6   4  10   6420.17   6294.01     86.93 o
   7   4  10     57.38     -6.89     26.01 <
   8   4  10   3614.02   3545.73     67.36 o
   9   4  10     20.15    133.17     37.35 o
  -9   5  10     41.83    145.73     66.25 <
  -8   5  10    618.75    491.99     65.36 o
  -7   5  10     97.38     53.24     46.80 <
  -6   5  10   1743.15   1560.89     60.58 o
  -5   5  10    205.88    309.13     38.24 o
  -4   5  10   2649.92   2717.82     49.47 o
  -3   5  10    422.44    521.00     27.79 o
  -2   5  10   2888.02   2878.33     49.13 o
  -1   5  10    602.35    695.74     27.01 o
   0   5  10   3487.73   3494.82     53.13 o
   1   5  10    619.95    641.72     24.57 o
   2   5  10   2045.16   2077.55     37.90 o
   3   5  10    182.19    140.17     21.56 o
   4   5  10   2205.67   2204.49     45.57 o
   5   5  10     89.21    101.26     25.01 o
   6   5  10   1230.13    935.40     37.57 o
   7   5  10    202.41    192.53     29.79 o
   8   5  10    348.51    220.32     33.90 o
  -8   6  10   2426.91   1956.72     87.37 o
  -7   6  10    122.93    162.62     50.91 o
  -6   6  10   4660.40   4508.14     94.15 o
  -5   6  10     81.22     48.47     32.01 <
  -4   6  10   5962.38   5884.61     83.37 o
  -3   6  10    208.89    121.27     23.90 o
  -2   6  10   5758.41   5980.54     80.03 o
  -1   6  10    814.69    873.04     31.24 o
   0   6  10  11691.60  11550.70    137.73 o
   1   6  10    608.13    552.35     27.57 o
   2   6  10   7061.98   6972.18     97.60 o
   3   6  10    440.09    477.98     27.01 o
   4   6  10   6563.99   6354.92     89.04 o
   5   6  10     54.94     27.90     25.68 <
   6   6  10   5672.91   5348.16     78.48 o
   7   6  10     59.01     26.90     28.01 <
   8   6  10   2906.57   3184.24     65.14 o
  -8   7  10   1030.01   1046.56     71.70 o
  -7   7  10    154.51    153.29     51.36 <
  -6   7  10    763.91    662.06     54.58 o
  -5   7  10    205.23    269.34     34.13 o
  -4   7  10   1992.70   1962.83     54.80 o
  -3   7  10    314.60    334.36     29.46 o
  -2   7  10   2620.79   2557.09     49.69 o
  -1   7  10    358.01    405.95     28.35 o
   0   7  10   4008.28   4182.22     63.69 o
   1   7  10    644.45    833.69     32.90 o
   2   7  10   2100.26   2141.47     46.91 o
   3   7  10    241.24    219.65     25.57 o
   4   7  10   1899.00   1744.96     47.02 o
   5   7  10    192.33    212.76     28.68 o
   6   7  10    390.48    248.88     31.46 o
   7   7  10    336.89    456.08     41.46 o
   8   7  10    626.72    320.47     42.80 o
  -7   8  10     46.24     -1.45     50.91 <
  -6   8  10   3671.17   3534.17     84.04 o
  -5   8  10    218.71    232.54     36.90 o
  -4   8  10   4705.17   4698.11     82.15 o
  -3   8  10    823.53    903.72     38.35 o
  -2   8  10   7072.49   7073.00     99.26 o
  -1   8  10    704.59    731.42     34.24 o
   0   8  10   7250.40   7133.36     98.04 o
   1   8  10    481.86    438.85     29.90 o
   2   8  10   7982.67   7708.83    116.49 o
   3   8  10    786.67    759.88     36.35 o
   4   8  10   4222.25   4082.07     75.48 o
   5   8  10    112.96     37.68     30.24 <
   6   8  10   4165.45   4165.88     82.26 o
   7   8  10     21.24    -53.58     37.79 <
  -7   9  10    228.49    290.35     56.02 o
  -6   9  10   1037.55   1023.77     61.69 o
  -5   9  10    266.65    238.21     39.35 o
  -4   9  10   1283.81   1352.02     49.58 o
  -3   9  10    365.80    465.64     32.46 o
  -2   9  10   2306.15   2378.45     52.13 o
  -1   9  10    361.10    381.94     29.79 o
   0   9  10    645.23    676.73     32.24 o
   1   9  10    781.45    848.36     36.35 o
   2   9  10   1957.52   1938.93     52.24 o
   3   9  10    307.36    269.23     31.79 o
   4   9  10   1003.17    872.59     41.57 o
   5   9  10    526.84    606.81     43.46 o
   6   9  10    685.02    401.06     40.24 o
   7   9  10    319.60    368.38     52.24 o
  -6  10  10   2833.41   2687.92     83.15 o
  -5  10  10    247.72    284.23     43.69 o
  -4  10  10   4627.92   4559.83     86.15 o
  -3  10  10    244.44    296.02     33.35 o
  -2  10  10   6494.41   6144.28     92.37 o
  -1  10  10    960.29    944.40     38.13 o
   0  10  10   4183.52   4187.22     70.47 o
   1  10  10    827.64    735.53     37.57 o
   2  10  10   5546.24   5330.71     91.59 o
   3  10  10    125.53    108.05     31.90 o
   4  10  10   4849.42   4623.74     87.15 o
   5  10  10    168.03    102.71     36.24 <
   6  10  10   2634.28   2296.75     77.48 o
  -5  11  10    400.52    375.49     47.46 o
  -4  11  10    787.47    882.60     50.47 o
  -3  11  10    293.10    335.03     34.68 o
  -2  11  10   1209.45   1414.82     46.91 o
  -1  11  10   1291.73   1374.03     45.57 o
   0  11  10    337.79    349.48     31.79 o
   1  11  10    620.56    601.03     35.35 o
   2  11  10   1390.03   1476.52     50.58 o
   3  11  10    448.24    431.85     40.68 o
   4  11  10    467.50    279.34     38.24 o
   5  11  10    572.08    596.48     46.02 o
  -4  12  10   3201.20   2848.32     76.25 o
  -3  12  10    215.49    169.74     35.01 o
  -2  12  10   4367.74   4080.62     73.70 o
  -1  12  10    249.97    272.00     34.68 o
   0  12  10   4167.54   4049.94     74.25 o
   1  12  10    286.57    366.60     36.02 o
   2  12  10   4141.15   3896.32     82.03 o
   3  12  10    171.37    110.82     40.13 <
   4  12  10   2748.90   2590.54     76.14 o
  -3  13  10    566.54    526.89     44.13 o
  -2  13  10    438.98    435.74     40.02 o
  -1  13  10    799.67    827.35     44.91 o
   0  13  10    873.49    859.81     44.91 o
   1  13  10    682.09    679.73     46.46 o
   2  13  10    438.80    494.21     43.80 o
   3  13  10    679.14    642.61     48.58 o
  -9   0  11    129.88     28.12     74.36 <
  -7   0  11    591.29    537.78     74.59 o
  -5   0  11    118.97     32.12     45.35 <
  -3   0  11    128.46    154.40     33.46 o
  -1   0  11    316.33    184.52     23.57 o
   1   0  11    508.41    575.69     33.24 o
   3   0  11    113.99    174.63     29.12 o
   5   0  11    196.03    214.09     36.79 o
   7   0  11   1022.38   1074.46     57.91 o
   9   0  11    281.42    397.06     60.80 o
  -9   1  11   3308.61   2810.64     94.82 o
  -8   1  11      9.33    -19.12     48.02 <
  -7   1  11   6496.14   6225.98    125.50 o
  -6   1  11    120.61     46.35     36.68 <
  -5   1  11   6493.92   6884.59    103.04 o
  -4   1  11    108.47     84.04     27.12 o
  -3   1  11  11779.60  11861.00    132.50 o
  -2   1  11     58.80     41.80     18.34 <
  -1   1  11   9771.71   9644.54     94.48 o
   0   1  11    422.32    336.81     20.12 o
   1   1  11   9630.19   9742.92    111.71 o
   2   1  11     81.08     96.37     19.90 o
   3   1  11  12001.30  11895.40    126.94 o
   4   1  11    126.18    103.49     21.01 o
   5   1  11   5667.60   5714.09     75.70 o
   6   1  11    219.09    198.31     27.57 o
   7   1  11   6711.74   6505.65     91.37 o
   8   1  11     15.17     46.35     31.79 <
   9   1  11   3665.08   3991.92     81.03 o
  -9   2  11    183.27    -11.12     52.80 <
  -8   2  11     20.76     64.36     50.24 <
  -7   2  11    226.10     58.36     44.24 <
  -6   2  11     57.36    202.09     37.68 o
  -5   2  11     65.41     63.69     32.79 <
  -4   2  11     15.76    119.27     28.68 o
  -3   2  11    134.61    111.49     25.46 o
  -2   2  11    133.54    242.77     21.90 o
  -1   2  11    260.29    214.54     18.79 o
   0   2  11     13.11    122.16     17.79 o
   1   2  11    507.39    581.25     26.68 o
   2   2  11     73.45    128.61     19.23 o
   3   2  11    272.56    323.92     23.68 o
   4   2  11     32.09     89.70     21.68 o
   5   2  11     93.36    132.50     25.01 o
   6   2  11     62.36    167.96     26.23 o
   7   2  11    477.94    621.82     36.24 o
   8   2  11     46.84     51.13     31.90 <
  -9   3  11   3316.81   2919.02     96.71 o
  -8   3  11     51.08     24.23     48.24 <
  -7   3  11   4683.83   4736.35     96.37 o
  -6   3  11     46.66     25.68     37.57 <
  -5   3  11   8512.45   8338.32    129.05 o
  -4   3  11     25.02    -39.68     26.46 <
  -3   3  11  11014.40  10793.00    137.61 o
  -2   3  11    297.12    301.80     22.90 o
  -1   3  11  12891.10  12844.50    132.61 o
   0   3  11     37.57    -20.45     16.67 <
   1   3  11  13932.70  13699.20    146.95 o
   2   3  11    158.99    120.50     20.23 o
   3   3  11  12121.80  11953.60    130.95 o
   4   3  11     50.13    -19.90     21.79 <
   5   3  11   9461.28   9283.05    110.49 o
   6   3  11     69.28     46.24     26.46 <
   7   3  11   3942.59   3844.86     65.47 o
   8   3  11     26.12    -36.90     32.79 <
  -8   4  11     63.02    151.29     54.47 <
  -7   4  11     66.53    -33.46     45.02 <
  -6   4  11    355.30    324.58     44.69 o
  -5   4  11    374.89    313.02     37.46 o
  -4   4  11     56.06    143.62     28.57 o
  -3   4  11    136.23     38.46     21.90 <
  -2   4  11    409.11    630.16     28.57 o
  -1   4  11    183.80    174.96     22.45 o
   0   4  11    588.81    764.33     29.23 o
   1   4  11     99.24     91.48     21.01 o
   2   4  11    207.65    257.44     22.90 o
   3   4  11    271.62    283.90     24.57 o
   4   4  11     61.04    162.18     24.79 o
   5   4  11    694.74    710.41     32.90 o
   6   4  11    594.21    661.84     36.02 o
   7   4  11    152.25    255.00     33.01 o
   8   4  11     76.27    155.18     35.79 o
  -8   5  11      0.63     24.34     50.35 <
  -7   5  11   3891.07   3688.01     92.59 o
  -6   5  11      4.81    -39.91     40.24 <
  -5   5  11   8632.67   8823.86    141.28 o
  -4   5  11     58.02     -7.11     28.68 <
  -3   5  11   9464.44   9426.34    115.94 o
  -2   5  11      0.51    -37.35     22.01 <
  -1   5  11  15717.30  15675.10    177.30 o
   0   5  11     19.88      1.33     22.79 <
   1   5  11  16281.20  15891.00    197.31 o
   2   5  11      1.16    -30.35     20.23 <
   3   5  11  10459.00  10398.60    123.61 o
   4   5  11    129.97     75.37     24.45 o
   5   5  11   8928.59   8588.76    110.38 o
   6   5  11      3.15     -3.33     27.90 <
   7   5  11   4250.86   4043.38     71.03 o
   8   5  11      0.32     50.35     34.79 <
  -8   6  11    109.48    137.28     56.80 <
  -7   6  11    226.67     16.01     47.58 <
  -6   6  11    426.25    527.34     49.69 o
  -5   6  11    209.01    130.17     36.35 o
  -4   6  11    417.86    548.90     36.02 o
  -3   6  11    124.25     73.03     25.68 <
  -2   6  11    632.21    755.21     32.24 o
  -1   6  11    105.48     32.46     23.57 <
   0   6  11    753.22    973.53     34.90 o
   1   6  11    218.29    227.65     25.34 o
   2   6  11    498.15    508.66     29.46 o
   3   6  11    214.40    186.75     27.46 o
   4   6  11    491.73    459.64     30.90 o
   5   6  11    421.38    531.56     34.01 o
   6   6  11    513.69    626.93     37.90 o
   7   6  11    499.37    571.13     41.80 o
   8   6  11    182.51    271.78     40.35 o
  -7   7  11   4250.19   3803.50    102.04 o
  -6   7  11    151.80     88.15     45.80 <
  -5   7  11   8236.61   8063.65    129.17 o
  -4   7  11     44.88     28.57     31.68 <
  -3   7  11   8477.79   8614.99    113.60 o
  -2   7  11     74.15     50.13     25.79 <
  -1   7  11  11296.00  11718.60    148.51 o
   0   7  11      5.69    -37.13     24.01 <
   1   7  11  12575.00  12691.80    163.51 o
   2   7  11     67.69      9.67     26.01 <
   3   7  11   8307.18   8173.03    122.83 o
   4   7  11     23.88     39.57     29.23 <
   5   7  11   8493.21   8145.57    124.72 o
   6   7  11    253.06    197.75     36.35 o
   7   7  11   4533.14   3988.81     87.04 o
  -7   8  11    120.68    -36.46     52.24 <
  -6   8  11    176.60    186.30     45.46 o
  -5   8  11    140.44     48.69     38.57 <
  -4   8  11    901.79   1002.09     46.02 o
  -3   8  11    258.29    179.85     29.46 o
  -2   8  11    970.90   1214.29     41.91 o
  -1   8  11     64.89     45.57     26.90 <
   0   8  11   1246.12   1478.85     44.69 o
   1   8  11     43.93     49.02     25.79 <
   2   8  11   1149.27   1211.85     46.69 o
   3   8  11    314.90    301.57     33.79 o
   4   8  11    910.17    842.91     43.91 o
   5   8  11    297.68    286.79     40.13 o
   6   8  11    319.22    401.06     43.57 o
   7   8  11    249.30    201.98     44.02 o
  -6   9  11     81.68     -0.56     52.13 <
  -5   9  11   4008.76   3951.35     94.82 o
  -4   9  11      2.85    -57.69     34.35 <
  -3   9  11   7515.66   7667.15    113.38 o
  -2   9  11     17.00     20.90     28.46 <
  -1   9  11   8592.99   8509.50    120.72 o
   0   9  11     54.58    -13.89     26.79 <
   1   9  11   7748.93   7834.00    117.05 o
   2   9  11     18.73    -12.34     29.90 <
   3   9  11   7379.59   7344.79    115.49 o
   4   9  11      6.29     -8.45     32.35 <
   5   9  11   4403.11   4053.61     86.59 o
   6   9  11    159.81     95.49     42.02 <
  -5  10  11    106.32     50.58     43.80 <
  -4  10  11    975.50    921.50     49.02 o
  -3  10  11    240.74    218.43     35.46 o
  -2  10  11    950.52   1118.59     43.57 o
  -1  10  11    236.95    191.97     33.24 o
   0  10  11    829.17    997.09     41.68 o
   1  10  11    125.43     45.80     29.01 <
   2  10  11   1132.87   1249.53     48.13 o
   3  10  11    364.39    292.01     38.13 o
   4  10  11   1093.64   1007.43     48.13 o
   5  10  11    204.65    104.82     41.91 <
  -5  11  11   3176.46   3137.56     87.15 o
  -4  11  11     44.15     27.23     41.02 <
  -3  11  11   5060.17   4930.09     86.15 o
  -2  11  11     23.17    -34.68     33.68 <
  -1  11  11   5401.16   5313.04     95.04 o
   0  11  11      4.40    -20.23     30.12 <
   1  11  11   5024.32   4915.20     93.60 o
   2  11  11     20.74    -15.12     33.24 <
   3  11  11   5298.99   4998.79     98.82 o
   4  11  11     89.25     40.91     40.35 <
  -3  12  11     72.17     -2.33     38.57 <
  -2  12  11    861.69    873.93     48.02 o
  -1  12  11    223.24    209.42     37.13 o
   0  12  11   1139.66   1055.11     47.69 o
   1  12  11    255.91    201.98     40.24 o
   2  12  11    728.31    786.45     47.13 o
   3  12  11    157.42    139.28     42.68 o
   0  13  11      0.02    -90.82     33.35 <
  -8   0  12   2226.19   2043.53    114.05 o
  -6   0  12   5032.35   5077.94    128.17 o
  -4   0  12   4944.49   4974.22    110.82 o
  -2   0  12   9180.07   9420.78    163.62 o
   0   0  12   7209.23   7253.30    117.27 o
   2   0  12   9322.67   9455.91    152.73 o
   4   0  12   4743.12   4657.65     96.04 o
   6   0  12   4886.48   4320.28     95.37 o
   8   0  12   1877.52   1665.71     78.59 o
  -8   1  12   1831.43   1457.51     71.03 o
  -7   1  12     24.49    101.15     45.91 <
  -6   1  12   2128.18   1970.06     59.58 o
  -5   1  12     43.58     67.58     34.46 <
  -4   1  12   2612.88   2583.10     53.24 o
  -3   1  12     62.61    186.30     26.23 o
  -2   1  12   4964.38   4871.18     66.47 o
  -1   1  12     30.54     98.71     20.01 o
   0   1  12   4812.10   4820.38     64.69 o
   1   1  12     45.14    130.17     22.34 o
   2   1  12   5632.49   5553.36     73.70 o
   3   1  12     33.84    101.15     22.12 o
   4   1  12   3010.44   3098.87     50.47 o
   5   1  12     99.86     72.59     24.90 <
   6   1  12   2564.89   2684.03     55.47 o
   7   1  12     26.20     46.69     29.68 <
   8   1  12   2565.48   2770.84     65.14 o
  -8   2  12   2427.90   2337.44     84.93 o
  -7   2  12     26.28    -22.68     44.46 <
  -6   2  12   3276.62   3471.25     73.36 o
  -5   2  12      8.04     58.91     34.13 <
  -4   2  12   5125.10   5317.15     85.26 o
  -3   2  12     69.25     88.70     25.90 o
  -2   2  12   7320.89   7324.33     89.37 o
  -1   2  12     64.05    123.94     23.01 o
   0   2  12   9600.47   9707.68    107.82 o
   1   2  12     90.62     59.14     22.68 <
   2   2  12   8003.75   8124.23     96.04 o
   3   2  12    145.42    219.76     23.90 o
   4   2  12   4299.69   4100.41     59.58 o
   5   2  12      8.10     51.13     26.01 <
   6   2  12   2917.30   2799.19     54.91 o
   7   2  12     53.72     35.79     30.68 <
   8   2  12   2405.37   2274.74     64.14 o
  -8   3  12   1723.52   1373.47     79.48 o
  -7   3  12     34.67     -2.78     47.46 <
  -6   3  12   2630.72   2354.67     68.25 o
  -5   3  12     24.07    131.95     38.91 o
  -4   3  12   3454.58   3315.96     61.80 o
  -3   3  12    515.98    547.34     32.24 o
  -2   3  12   5323.20   5179.76     71.36 o
  -1   3  12     48.95    112.49     22.90 o
   0   3  12   5135.62   4767.69     72.48 o
   1   3  12    111.46    215.43     24.79 o
   2   3  12   4298.25   4074.84     60.25 o
   3   3  12    221.84     86.26     21.90 o
   4   3  12   4126.77   3976.36     63.92 o
   5   3  12     21.65     77.92     26.57 <
   6   3  12   3414.74   3459.47     61.58 o
   7   3  12     76.01    135.61     31.90 o
   8   3  12   2150.28   2270.19     64.25 o
  -8   4  12   1584.17   1552.99     74.25 o
  -7   4  12      8.26     22.45     47.80 <
  -6   4  12   3298.36   3305.29     86.59 o
  -5   4  12     16.46     54.91     38.02 <
  -4   4  12   4757.95   5076.05     80.26 o
  -3   4  12    156.81    122.39     26.68 o
  -2   4  12   4768.25   4986.45     69.81 o
  -1   4  12     49.43     76.59     23.57 o
   0   4  12   6982.11   7074.78     96.71 o
   1   4  12     93.97    136.06     24.57 o
   2   4  12   4732.26   4822.60     67.47 o
   3   4  12    357.75    432.30     27.68 o
   4   4  12   4866.83   4880.74     71.25 o
   5   4  12     37.00     15.45     27.01 <
   6   4  12   2941.09   2677.58     54.91 o
   7   4  12      4.36    -42.80     31.01 <
   8   4  12   1320.11   1202.07     51.36 o
  -7   5  12    181.12    138.28     50.91 <
  -6   5  12   2696.59   2320.54     75.70 o
  -5   5  12    200.76    124.94     35.90 o
  -4   5  12   4299.68   3960.24     72.14 o
  -3   5  12     34.42    121.39     28.68 o
  -2   5  12   3395.63   3344.09     56.80 o
  -1   5  12    273.99    264.45     27.23 o
   0   5  12   6964.86   6848.91     95.26 o
   1   5  12    140.38    139.39     25.79 o
   2   5  12   3862.83   3799.06     66.47 o
   3   5  12     17.35     33.24     23.57 <
   4   5  12   4921.90   4508.14     72.59 o
   5   5  12    298.22    345.70     32.46 o
   6   5  12   3394.98   3298.62     68.14 o
   7   5  12    131.82     70.47     34.79 <
  -7   6  12    133.25     99.04     50.69 <
  -6   6  12   2373.21   2363.11     78.48 o
  -5   6  12    152.24    167.40     39.57 o
  -4   6  12   3519.30   3481.92     77.70 o
  -3   6  12    137.51     46.91     29.35 <
  -2   6  12   3347.46   3410.67     59.58 o
  -1   6  12    105.84    131.39     26.79 o
   0   6  12   3806.09   4201.12     69.03 o
   1   6  12    204.22    243.99     27.57 o
   2   6  12   3632.50   3764.71     66.47 o
   3   6  12    219.25    226.54     31.01 o
   4   6  12   4117.40   3994.81     73.03 o
   5   6  12    176.31    155.96     32.01 o
   6   6  12   2221.35   2240.84     60.14 o
   7   6  12    296.13    230.10     39.68 o
  -7   7  12    127.13    166.63     52.58 o
  -6   7  12   2292.11   1401.37     84.81 o
  -5   7  12    203.43    211.09     47.46 o
  -4   7  12   2992.85   2702.93     66.92 o
  -3   7  12    344.39    403.95     34.35 o
  -2   7  12   3738.53   3731.03     66.25 o
  -1   7  12    170.99    281.79     31.35 o
   0   7  12   4852.41   4874.29     79.92 o
   1   7  12     79.32    115.94     28.46 o
   2   7  12   4746.82   4606.18     79.81 o
   3   7  12    407.74    446.30     38.02 o
   4   7  12   3148.04   3053.96     70.25 o
   5   7  12    114.45     60.14     34.01 <
   6   7  12   3461.85   3232.26     78.59 o
  -6   8  12   1732.22   1669.15     73.36 o
  -5   8  12    244.18    162.40     47.91 o
  -4   8  12   2656.51   2764.73     67.81 o
  -3   8  12    325.68    304.24     34.79 o
  -2   8  12   3016.03   3135.33     63.80 o
  -1   8  12    156.77    183.52     30.90 o
   0   8  12   3066.50   3089.42     61.92 o
   1   8  12    358.59    456.86     34.90 o
   2   8  12   2692.42   2682.81     65.03 o
   3   8  12    292.37    226.99     34.46 o
   4   8  12   3248.36   3197.14     75.25 o
   5   8  12    383.60    261.78     43.46 o
   6   8  12   1811.63   1602.01     65.14 o
  -5   9  12    279.86    260.78     52.24 o
  -4   9  12   2304.28   2080.55     65.47 o
  -3   9  12    385.97    534.89     44.13 o
  -2   9  12   3183.57   3079.75     64.69 o
  -1   9  12    285.72    368.16     36.57 o
   0   9  12   1943.33   2034.98     54.69 o
   1   9  12    190.39    162.85     32.90 o
   2   9  12   3774.65   3611.65     77.48 o
   3   9  12    264.65    360.38     37.90 o
   4   9  12   3214.19   2973.71     77.92 o
   5   9  12    236.38    215.54     44.46 o
  -5  10  12    237.79    235.88     48.91 o
  -4  10  12   2033.29   2271.19     73.81 o
  -3  10  12    145.02    158.40     42.80 o
  -2  10  12   3649.32   4085.62     79.26 o
  -1  10  12    263.70    247.88     37.79 o
   0  10  12   1497.09   1748.52     55.02 o
   1  10  12    187.88    129.17     34.90 o
   2  10  12   3563.21   3456.25     76.25 o
   3  10  12    138.21     89.82     39.24 <
   4  10  12   1845.57   1766.08     63.25 o
  -3  11  12    257.98    285.12     46.80 o
  -2  11  12   2141.36   1967.06     63.03 o
  -1  11  12    488.93    574.58     44.69 o
   0  11  12   1337.08   1342.24     53.69 o
   1  11  12    550.26    611.70     45.57 o
   2  11  12   2165.82   2168.92     73.70 o
   3  11  12    227.13    207.87     44.46 o
  -1  12  12    338.83    366.60     43.24 o
   0  12  12   2321.71   2539.52     73.25 o
   1  12  12    201.86    240.10     43.57 o
  -7   0  13   3878.33   3027.62    124.50 o
  -5   0  13   3116.27   3212.81     99.15 o
  -3   0  13   9044.07   9653.77    193.42 o
  -1   0  13  10581.00  11074.70    187.30 o
   1   0  13  10296.50  10127.70    164.29 o
   3   0  13   9850.25   9809.72    168.96 o
   5   0  13   3259.92   3424.34     88.26 o
   7   0  13   5339.39   5418.75    123.28 o
  -8   1  13      2.04     43.57     50.58 <
  -7   1  13    180.76    166.40     49.35 o
  -6   1  13      3.47     76.48     41.80 <
  -5   1  13     27.09    -59.25     37.68 <
  -4   1  13     31.32    119.61     33.13 o
  -3   1  13    220.10    249.33     29.57 o
  -2   1  13    118.26    264.67     28.35 o
  -1   1  13    513.70    577.47     30.46 o
   0   1  13     49.25    127.83     22.45 o
   1   1  13    473.68    493.88     27.01 o
   2   1  13    264.60    366.16     26.68 o
   3   1  13    186.23    146.62     24.34 o
   4   1  13     71.83    163.85     25.68 o
   5   1  13     53.99     73.81     28.23 <
   6   1  13      1.84     23.90     29.01 <
   7   1  13    104.20     20.56     34.24 <
  -7   2  13   3297.77   2983.05     87.70 o
  -6   2  13     19.95    -87.26     41.46 <
  -5   2  13   4709.72   4628.19     87.70 o
  -4   2  13    372.83    444.19     40.91 o
  -3   2  13   7614.55   7588.78    110.49 o
  -2   2  13     70.86     28.12     27.79 <
  -1   2  13   8037.05   8160.69    109.82 o
   0   2  13     57.21    -11.78     24.57 <
   1   2  13   8060.99   8404.24    105.93 o
   2   2  13     84.99    -13.01     22.90 <
   3   2  13   7984.30   7838.77     95.26 o
   4   2  13    279.62    165.74     26.79 o
   5   2  13   5789.78   6263.33     86.81 o
   6   2  13     20.06     33.24     30.12 <
   7   2  13   3619.04   3430.01     71.59 o
  -7   3  13    132.54     74.36     52.58 <
  -6   3  13     89.73    145.62     42.13 o
  -5   3  13    266.89    266.78     40.13 o
  -4   3  13     50.95    109.60     32.35 o
  -3   3  13    124.77    107.82     28.57 o
  -2   3  13    104.74    157.40     29.12 o
  -1   3  13     86.21     82.81     26.12 o
   0   3  13    362.44    456.42     29.12 o
   1   3  13    110.06    106.38     27.34 o
   2   3  13    185.35    249.44     26.57 o
   3   3  13    104.77    117.83     24.57 o
   4   3  13    111.51    214.65     28.90 o
   5   3  13    140.34     62.36     29.12 <
   6   3  13    152.37    161.62     32.68 o
   7   3  13    124.50     81.81     36.02 <
  -7   4  13   2774.30   2428.48     81.92 o
  -6   4  13      2.56    -99.82     45.02 <
  -5   4  13   4727.47   4546.82     92.59 o
  -4   4  13    166.98    205.09     36.68 o
  -3   4  13   4936.41   4819.38     80.48 o
  -2   4  13     24.77    -35.01     25.12 <
  -1   4  13   6064.34   6318.80     98.15 o
   0   4  13    152.41     91.26     27.46 o
   1   4  13   5727.86   6027.56     88.26 o
   2   4  13     47.17    -20.90     26.79 <
   3   4  13   4941.44   5100.94     70.36 o
   4   4  13     85.98     -5.11     24.12 <
   5   4  13   5289.66   5191.65     81.37 o
   6   4  13      2.19    -39.68     30.35 <
   7   4  13   3180.13   3296.07     71.81 o
  -7   5  13    234.68    224.65     54.58 o
  -6   5  13    205.98    227.32     51.58 o
  -5   5  13    162.83    226.10     42.13 o
  -4   5  13    110.74    137.39     35.79 o
  -3   5  13     89.45     30.68     30.90 <
  -2   5  13    176.71    188.86     28.35 o
  -1   5  13     68.94     81.59     28.12 <
   0   5  13    306.07    457.08     33.68 o
   1   5  13     94.42    101.60     26.79 o
   2   5  13    198.94    234.88     31.79 o
   3   5  13    141.39    102.82     30.46 o
   4   5  13    118.84     86.93     29.12 <
   5   5  13     72.94     22.90     30.12 <
   6   5  13    184.36    137.06     37.24 o
   7   5  13    161.38     22.90     39.02 <
  -6   6  13    110.72    150.29     50.91 <
  -5   6  13   4785.34   5077.82    110.71 o
  -4   6  13     50.10    -39.13     37.79 <
  -3   6  13   3097.63   3247.82     67.47 o
  -2   6  13    148.50    148.51     29.57 o
  -1   6  13   4361.78   4591.62     78.14 o
   0   6  13      4.81    -63.36     28.12 <
   1   6  13   4742.17   4862.73     80.26 o
   2   6  13     67.86     37.57     29.68 <
   3   6  13   2868.82   2955.70     65.58 o
   4   6  13     50.49    -29.90     33.35 <
   5   6  13   4563.03   4530.59     89.70 o
   6   6  13     71.84    -16.34     37.79 <
  -6   7  13    227.32    360.15     55.58 o
  -5   7  13    178.18    299.35     52.24 o
  -4   7  13    304.01    447.19     51.91 o
  -3   7  13    159.04     96.15     34.35 <
  -2   7  13    122.11    190.52     31.24 o
  -1   7  13    204.80    214.65     32.01 o
   0   7  13    191.67    274.01     34.68 o
   1   7  13     98.05    157.40     32.35 o
   2   7  13    124.94    114.60     31.68 o
   3   7  13    176.84    182.63     36.24 o
   4   7  13    282.44    346.48     44.13 o
   5   7  13    155.28    106.82     43.80 <
   6   7  13    147.37    101.15     44.69 <
  -5   8  13   2970.01   2880.00     86.26 o
  -4   8  13    121.70     43.57     44.13 <
  -3   8  13   3541.75   3531.83     82.70 o
  -2   8  13     27.56     57.58     32.68 <
  -1   8  13   3468.72   3639.21     72.81 o
   0   8  13     17.22    -25.34     30.79 <
   1   8  13   3984.10   4128.42     80.59 o
   2   8  13     26.02     11.56     31.68 <
   3   8  13   3479.82   3355.65     78.14 o
   4   8  13    214.54    162.96     43.13 o
   5   8  13   3113.77   2804.86     79.81 o
  -4   9  13    577.54    579.47     51.69 o
  -3   9  13    167.68    197.86     45.80 o
  -2   9  13    234.60    299.68     40.68 o
  -1   9  13    207.10    246.10     40.57 o
   0   9  13     97.85    119.16     36.90 o
   1   9  13    321.33    337.70     40.02 o
   2   9  13    259.08    292.90     40.91 o
   3   9  13     80.99     75.59     38.57 <
   4   9  13    501.62    452.97     48.80 o
  -3  10  13   3219.13   3126.88     86.48 o
  -2  10  13     47.12     12.56     38.35 <
  -1  10  13   3813.63   3565.40     81.92 o
   0  10  13     78.30     26.12     39.46 <
   1  10  13   3459.58   3399.67     82.26 o
   2  10  13     28.27     21.34     41.24 <
   3  10  13   3878.98   3983.25     94.04 o
  -2  11  13    480.33    576.80     48.24 o
  -1  11  13    104.63    131.61     41.46 o
   0  11  13    630.42    755.88     53.24 o
   1  11  13     93.73    108.16     42.13 <
  -6   0  14    716.16    245.55     76.92 o
  -4   0  14    825.66    464.42     59.25 o
  -2   0  14    835.29    574.58     52.02 o
   0   0  14    784.87    727.20     42.13 o
   2   0  14   1468.43   1723.51     55.69 o
   4   0  14   1218.53   1208.40     63.03 o
   6   0  14   1011.96   1004.76     68.14 o
  -7   1  14     28.47     10.00     50.80 <
  -6   1  14   2851.28   2805.53     89.48 o
  -5   1  14      3.34    -57.91     40.02 <
  -4   1  14   2840.59   2952.03     75.37 o
  -3   1  14      0.19    -32.01     32.24 <
  -2   1  14   3798.59   4014.04     76.59 o
  -1   1  14     79.08     40.24     32.01 <
   0   1  14   3186.57   3331.97     58.69 o
   1   1  14     40.16    -19.79     24.12 <
   2   1  14   3900.52   4306.39     65.03 o
   3   1  14      0.26    -52.36     23.79 <
   4   1  14   2410.65   2665.69     53.24 o
   5   1  14      3.39    -54.02     29.57 <
   6   1  14   3019.90   3139.44     66.47 o
   7   1  14     47.16    -56.91     36.02 <
  -7   2  14      5.82     25.68     50.47 <
  -6   2  14    551.24    242.66     51.47 o
  -5   2  14      9.58     75.37     40.57 <
  -4   2  14    543.50    446.74     42.46 o
  -3   2  14    152.17    180.30     35.57 o
  -2   2  14   1076.11   1064.67     50.35 o
  -1   2  14     51.48     65.92     30.35 <
   0   2  14    516.49    567.46     33.46 o
   1   2  14    116.16    210.87     30.01 o
   2   2  14    985.77    964.85     36.02 o
   3   2  14    174.46    125.28     26.90 o
   4   2  14    757.71    813.79     37.13 o
   5   2  14     21.46     65.92     30.90 <
   6   2  14    904.32   1016.65     48.35 o
  -7   3  14      4.52     -9.89     54.80 <
  -6   3  14   2059.84   2083.33     77.81 o
  -5   3  14      4.08    -30.90     40.13 <
  -4   3  14   3014.18   3195.14     72.25 o
  -3   3  14     92.54     24.23     32.12 <
  -2   3  14   3402.63   3514.27     75.03 o
  -1   3  14      2.12    -42.68     27.01 <
   0   3  14   5005.94   5291.92     81.48 o
   1   3  14      1.23    -61.69     24.45 <
   2   3  14   3352.11   3429.90     60.91 o
   3   3  14    209.58    154.29     27.68 o
   4   3  14   2838.40   2989.16     56.47 o
   5   3  14      3.69    -43.80     30.35 <
   6   3  14   2043.96   2356.22     61.36 o
  -6   4  14    392.16    264.11     51.58 o
  -5   4  14    172.37    206.31     45.13 o
  -4   4  14    576.71    395.95     44.35 o
  -3   4  14     56.48     71.81     34.01 <
  -2   4  14    346.60    377.16     41.68 o
  -1   4  14    101.42    148.84     32.01 o
   0   4  14    930.78    888.60     39.91 o
   1   4  14    202.18    219.09     29.68 o
   2   4  14    215.61    191.64     32.35 o
   3   4  14     36.01     99.38     29.12 o
   4   4  14    728.16    698.07     37.79 o
   5   4  14    302.57    313.69     36.68 o
   6   4  14    449.82    436.74     45.57 o
  -6   5  14   2687.01   2585.77     85.04 o
  -5   5  14      1.61    -60.36     43.46 <
  -4   5  14   3474.39   3557.96     90.04 o
  -3   5  14     13.04     -8.67     37.68 <
  -2   5  14   3293.20   3539.84     80.70 o
  -1   5  14     16.91      1.11     30.90 <
   0   5  14   3409.77   3577.41     69.81 o
   1   5  14     37.03     37.57     28.79 <
   2   5  14   2849.91   2925.13     63.80 o
   3   5  14     29.76      9.11     31.79 <
   4   5  14   3444.41   3575.30     75.03 o
   5   5  14      1.14    -37.13     33.57 <
   6   5  14   2650.67   2438.04     67.14 o
  -5   6  14    165.98    211.98     54.91 o
  -4   6  14    507.75    456.64     56.69 o
  -3   6  14    156.52    187.97     42.24 o
  -2   6  14    264.79    187.52     37.79 o
  -1   6  14    332.25    422.62     40.13 o
   0   6  14    702.65    637.94     41.46 o
   1   6  14    181.67    224.87     33.57 o
   2   6  14    332.47    392.95     39.57 o
   3   6  14    330.87    284.45     40.24 o
   4   6  14    360.81    307.13     45.57 o
   5   6  14    193.17     84.70     41.24 <
  -5   7  14      9.59    -95.49     50.02 <
  -4   7  14   3110.66   3112.21     90.59 o
  -3   7  14     34.49      4.78     43.02 <
  -2   7  14   3076.82   3140.67     77.81 o
  -1   7  14     21.07    -21.23     35.57 <
   0   7  14   3727.24   3840.85     82.15 o
   1   7  14     47.33     27.01     35.46 <
   2   7  14   2589.93   2540.97     65.14 o
   3   7  14     15.00    -28.79     39.46 <
   4   7  14   2868.51   2758.17     79.03 o
   5   7  14     13.46     -9.23     42.35 <
  -4   8  14    316.50    297.57     55.91 o
  -3   8  14    512.07    572.47     52.69 o
  -2   8  14    604.14    484.76     46.02 o
  -1   8  14    282.67    467.86     48.80 o
   0   8  14    356.98    305.68     43.02 o
   1   8  14    210.90    288.57     42.02 o
   2   8  14    736.80    634.16     49.02 o
   3   8  14    664.58    732.20     52.80 o
   4   8  14    303.78    342.81     49.02 o
  -3   9  14     36.03     -3.00     45.35 <
  -2   9  14   3260.27   3433.79     77.92 o
  -1   9  14     90.55     -3.00     40.35 <
   0   9  14   2265.44   2224.06     72.36 o
   1   9  14    133.06     13.89     39.68 <
   2   9  14   2991.17   3017.62     79.26 o
   3   9  14     30.38    -38.46     41.02 <
  -1  10  14    595.91    632.16     52.24 o
   0  10  14    269.86    160.74     44.13 o
   1  10  14    634.35    727.53     53.24 o
  -5   0  15   1216.60   1035.88    108.05 o
  -3   0  15   1264.59   1451.17     86.81 o
  -1   0  15   1584.17   1837.56     93.04 o
   1   0  15   1677.68   1888.69     71.25 o
   3   0  15   1044.50   1255.20     59.25 o
   5   0  15   1429.80   1825.11     83.48 o
  -6   1  15     10.05     -8.67     53.47 <
  -5   1  15   1773.16   1518.53     87.82 o
  -4   1  15     41.18      1.78     50.13 <
  -3   1  15   3014.26   3345.31     88.93 o
  -2   1  15     32.40     52.24     35.35 <
  -1   1  15   2124.51   2250.96     59.69 o
   0   1  15     39.76     -4.22     30.46 <
   1   1  15   2034.27   2117.01     52.24 o
   2   1  15     42.01     33.57     26.12 <
   3   1  15   3224.37   3443.13     61.47 o
   4   1  15     27.82     92.37     35.57 <
   5   1  15   1815.52   2230.39     65.36 o
   6   1  15      8.69     34.57     37.57 <
  -6   2  15     36.12    108.38     53.24 <
  -5   2  15   1358.41   1276.21     72.59 o
  -4   2  15     13.92     62.14     47.13 <
  -3   2  15   1606.68   1984.29     71.81 o
  -2   2  15      8.79     71.25     35.13 <
  -1   2  15   1529.12   1739.52     61.25 o
   0   2  15     72.96     56.13     31.24 <
   1   2  15   1238.37   1331.45     45.02 o
   2   2  15      9.28      2.56     27.90 <
   3   2  15   1268.99   1298.00     41.57 o
   4   2  15      7.57     29.01     29.35 <
   5   2  15   1300.77   1307.78     50.58 o
   6   2  15     25.46     44.91     39.02 <
  -6   3  15      2.51    -46.91     56.69 <
  -5   3  15   2299.66   1969.50     87.82 o
  -4   3  15     69.09    146.51     50.35 <
  -3   3  15   2735.86   2612.89     81.15 o
  -2   3  15    129.89     62.69     38.68 <
  -1   3  15   2283.93   2335.55     67.03 o
   0   3  15      3.17     14.45     29.90 <
   1   3  15   2132.51   2308.76     57.69 o
   2   3  15    263.28    249.66     34.57 o
   3   3  15   2864.55   2870.00     59.03 o
   4   3  15     30.26     42.68     29.79 <
   5   3  15   3009.16   3306.18     70.14 o
  -5   4  15   1299.10   1360.24     77.92 o
  -4   4  15     26.32     34.35     47.91 <
  -3   4  15   1410.02   1693.05     72.03 o
  -2   4  15     26.98     59.69     41.13 <
  -1   4  15   1646.16   1998.40     66.58 o
   0   4  15     84.12    139.39     32.35 o
   1   4  15   1637.36   1839.56     55.91 o
   2   4  15     12.18     43.91     32.90 <
   3   4  15   1130.01   1151.82     48.69 o
   4   4  15     30.34     -3.56     34.79 <
   5   4  15    882.39    802.90     52.02 o
  -5   5  15   2028.36   1801.88     85.37 o
  -4   5  15     39.78     26.68     55.80 <
  -3   5  15   1818.41   1869.35     80.59 o
  -2   5  15     46.53    -15.45     43.02 <
  -1   5  15   3640.33   3544.17     83.15 o
   0   5  15    113.49     99.26     36.57 <
   1   5  15   3702.01   3591.19     76.14 o
   2   5  15    105.09    135.50     39.24 o
   3   5  15   2095.19   2273.52     63.80 o
   4   5  15     61.94     78.03     40.02 <
   5   5  15   2254.11   2005.52     74.70 o
  -4   6  15     19.00     77.37     56.25 <
  -3   6  15   1372.28   1303.33     78.48 o
  -2   6  15     76.47    110.16     49.91 <
  -1   6  15   1564.82   1817.66     66.14 o
   0   6  15    171.65    272.12     40.46 o
   1   6  15   1189.32   1309.45     53.47 o
   2   6  15    130.65    136.95     42.02 o
   3   6  15   1362.96   1403.15     61.14 o
   4   6  15     24.72    -10.78     41.57 <
  -4   7  15     87.99     36.13     56.02 <
  -3   7  15   2049.11   2026.64     86.04 o
  -2   7  15    226.81    204.98     53.02 o
  -1   7  15   2849.73   2832.31     76.14 o
   0   7  15     57.98     35.79     39.68 <
   1   7  15   3703.77   3728.25     86.93 o
   2   7  15    185.02    163.85     44.35 o
   3   7  15   2229.95   2260.63     72.25 o
  -2   8  15     89.32     37.90     47.35 <
  -1   8  15    932.27    987.31     56.47 o
   0   8  15    318.14    244.99     44.80 o
   1   8  15    970.16   1194.29     60.14 o
   2   8  15    117.11    180.63     44.24 o
  -4   0  16   3697.32   3959.57    180.52 o
  -2   0  16   4014.16   4557.49    160.96 o
   0   0  16   2633.52   2933.14    113.27 o
   2   0  16   4359.33   4876.52    115.05 o
   4   0  16   3629.71   3948.01    121.27 o
  -5   1  16      7.79    226.32     65.25 o
  -4   1  16     53.70    -70.25     57.58 <
  -3   1  16     42.59     98.26     53.24 <
  -2   1  16     36.87    -19.01     43.80 <
  -1   1  16      0.25    116.49     45.80 <
   0   1  16     37.50      5.22     38.46 <
   1   1  16      0.37     49.47     37.13 <
   2   1  16     16.84     17.45     30.68 <
   3   1  16     77.42    181.85     34.57 o
   4   1  16     65.75     38.13     38.79 <
  -5   2  16     35.61    -18.45     66.25 <
  -4   2  16   3339.01   3612.87    135.17 o
  -3   2  16     34.67    -86.70     59.14 <
  -2   2  16   3920.63   4033.49    106.93 o
  -1   2  16     80.18      3.11     39.13 <
   0   2  16   4372.25   4926.98    112.16 o
   1   2  16     88.02    -20.90     33.13 <
   2   2  16   4467.79   4744.02     86.48 o
   3   2  16     42.41    -38.13     33.46 <
   4   2  16   3534.10   3826.07     78.14 o
  -4   3  16    133.39     44.91     60.91 <
  -3   3  16     79.39     45.02     55.02 <
  -2   3  16     14.13    -67.92     42.35 <
  -1   3  16     32.53    160.74     42.80 o
   0   3  16      0.26     -1.78     39.57 <
   1   3  16     73.91    145.84     36.24 o
   2   3  16      6.15    -50.80     34.57 <
   3   3  16     36.91     95.37     37.02 <
   4   3  16     59.24    -32.90     37.24 <
  -4   4  16   3251.96   2915.91    124.61 o
  -3   4  16      4.73    -15.78     61.14 <
  -2   4  16   3818.08   4074.62     97.37 o
  -1   4  16     37.14    -17.01     42.68 <
   0   4  16   4439.20   4688.10     86.59 o
   1   4  16     65.10    -12.89     35.57 <
   2   4  16   4039.74   4396.98     84.15 o
   3   4  16      3.53    -45.24     35.90 <
   4   4  16   4059.13   4332.62     91.93 o
  -3   5  16     32.44    181.08     64.58 <
  -2   5  16    159.68    129.83     53.47 <
  -1   5  16    306.45    384.72     51.91 o
   0   5  16     33.19     36.24     39.24 <
   1   5  16    194.57    252.55     42.80 o
   2   5  16     69.20    -40.46     39.46 <
   3   5  16     15.48     54.58     42.02 <
  -3   6  16      8.36    -19.01     64.14 <
  -2   6  16   3002.18   3173.24     99.82 o
  -1   6  16     65.87    -17.67     46.46 <
   0   6  16   4141.56   4544.71     98.49 o
   1   6  16     72.08    -59.69     40.80 <
   2   6  16   3259.54   3414.67     85.26 o
  -1   7  16    369.39    554.57     54.13 o
   0   7  16     25.97     82.26     44.02 <
   1   7  16    208.00    354.15     48.80 o
  -3   0  17    583.19    436.63    102.15 o
  -1   0  17   1021.60    813.12     92.04 o
   1   0  17   1189.75   1043.00     98.60 o
   3   0  17    926.14   1110.69     69.36 o
  -3   1  17   2250.93   2517.18    106.16 o
  -2   1  17     12.99    -43.91     53.36 <
  -1   1  17   2735.92   2995.49     95.49 o
   0   1  17     21.94     19.12     51.58 <
   1   1  17   2973.52   3210.92     91.59 o
   2   1  17     27.59    -24.12     42.35 <
   3   1  17   2298.82   2748.83     69.47 o
  -3   2  17    768.69    468.53     79.37 o
  -2   2  17     67.19    150.62     63.03 <
  -1   2  17    656.45    684.51     68.47 o
   0   2  17      6.28     18.67     50.35 <
   1   2  17    672.25    682.51     61.25 o
   2   2  17     57.27     86.70     42.80 <
   3   2  17   1001.62   1071.34     57.36 o
  -2   3  17     11.46     43.91     68.92 <
  -1   3  17   2574.56   2954.92     95.26 o
   0   3  17      4.68    -72.36     50.35 <
   1   3  17   2622.78   2918.35     81.15 o
   2   3  17     11.95    -62.25     40.46 <
  -2   4  17     22.04    172.96     67.03 <
  -1   4  17    829.97    832.80     67.58 o
   0   4  17     79.12    143.73     53.91 <
   1   4  17    757.62    787.67     53.58 o

loop_
 _twin_refln_datum_id
 _twin_refln_individual_id
 _twin_refln_index_h
 _twin_refln_index_k
 _twin_refln_index_l
 _twin_refln_F_squared_calc
 _twin_refln_F_squared_meas
 _twin_refln_F_squared_sigma
 _twin_refln_include_status
 ? ? ? ? ? ? ? ? ?
